# Supplementary material for: C–H bond activation by high-valent iron/cobalt–oxo complexes: a quantum chemical modeling approach
Source: Royal Society of Chemistry journal article supplement (doi:10.1039/d3cp05866b), 2023-12-22
Supplement: d3cp05866b1.pdf [file d3cp05866b1.pdf]

--- *Supplementary Information* ---

**C-H Bond Activation by High-valent Iron/Cobalt-Oxo Complexes: A Quantum  
Chemical Modeling Approach**

Manjeet Kumar<sup>1</sup>, Manoj Kumar Gupta<sup>1</sup>, Mursaleem Ansari<sup>2\*</sup> and Azaj Ansari<sup>1\*</sup>

<sup>1</sup>Department of Chemistry, Central University of Haryana, Mahendergarh – 123031, India

<sup>2</sup>Max-Planck-Institut für Kohlenforschung, Kaiser-Wilhelm-Platz 1, 45470 Mülheim an der Ruhr,  
Germany

\*Correspondence to Mursaleem Ansari ([mansaribhu@gmail.com](mailto:mansaribhu@gmail.com)), Azaj Ansari  
([ajaz.alam2@gmail.com](mailto:ajaz.alam2@gmail.com))

**Table S1** Energy computed using DLPNO-CCSD(T) method for species **1** and **2**.

| <b>Spin States</b>                  | <b>Relative energy (kJ/mol)</b> |
|-------------------------------------|---------------------------------|
| <sup>5</sup> <b>1</b> <sub>hs</sub> | 25.6                            |
| <sup>3</sup> <b>1</b> <sub>is</sub> | 0.0                             |
| <sup>1</sup> <b>1</b> <sub>is</sub> | 128.6                           |
| <sup>6</sup> <b>2</b> <sub>hs</sub> | 134.4                           |
| <sup>4</sup> <b>2</b> <sub>is</sub> | 34.3                            |
| <sup>2</sup> <b>2</b> <sub>is</sub> | 0.0                             |

**Table S2** Computed salient bond parameters of all the studied species. *Given bond length in Å and angle in °.*

| Fe-oxo                          |       |       |                    |        |                      |                     |         |       |       |       |
|---------------------------------|-------|-------|--------------------|--------|----------------------|---------------------|---------|-------|-------|-------|
| Species                         | Fe-O  | O-H   | H-C <sub>DHA</sub> | Fe-O-H | O-H-C <sub>DHA</sub> | Fe-C <sub>NHC</sub> | Fe-N1   | Fe-N2 | Fe-N3 | Fe-N4 |
| <sup>5</sup> 1 <sub>HS</sub>    | 1.661 | -     | -                  | -      | -                    | 2.208               | 2.052   | 2.072 | 2.051 | 2.072 |
| <sup>3</sup> 1 <sub>IS</sub>    | 1.671 | -     | -                  | -      | -                    | 2.180               | 1.983   | 1.988 | 1.984 | 1.988 |
| <sup>1</sup> 1 <sub>LS</sub>    | 1.671 | -     | -                  | -      | -                    | 2.178               | 1.987   | 1.981 | 1.987 | 1.982 |
| <sup>5</sup> TS1 <sub>HS</sub>  | 1.755 | 1.263 | 1.295              | 119.7  | 158.6                | 2.145               | 2.040   | 2.084 | 2.043 | 2.070 |
| <sup>3</sup> TS1 <sub>IS</sub>  | 1.768 | 1.267 | 1.296              | 116.7  | 160.7                | 2.130               | 1.978   | 1.988 | 1.983 | 1.977 |
| <sup>1</sup> TS1 <sub>LS</sub>  | 1.752 | 1.332 | 1.220              | 115.3  | 159.6                | 2.110               | 1.973   | 2.012 | 2.000 | 1.952 |
| <sup>6</sup> Int1 <sub>HS</sub> | 1.881 | 0.976 | -                  | 122.5  | -                    | 2.475               | 2.082   | 2.077 | 2.055 | 2.084 |
| <sup>4</sup> Int1 <sub>IS</sub> | 1.917 | 0.979 | -                  | 117.8  | -                    | 2.487               | 2.011   | 2.007 | 1.996 | 2.013 |
| <sup>2</sup> Int1 <sub>LS</sub> | 1.839 | 0.982 | -                  | 108.9  | -                    | 2.107               | 1.986   | 1.984 | 1.979 | 1.984 |
| <sup>7</sup> TS2 <sub>HS</sub>  | 2.017 | 1.272 | 1.340              | 126.3  | 170.9                | 2.315               | 2.039   | 2.069 | 2.076 | 2.053 |
| <sup>5</sup> TS2 <sub>HS</sub>  | 1.953 | 1.385 | 1.249              | 135.3  | 169.9                | 2.175               | 2.042   | 2.091 | 2.053 | 2.094 |
| <sup>5</sup> TS2 <sub>IS</sub>  | 2.029 | 1.338 | 1.284              | 127.7  | 173.4                | 2.366               | 1.977   | 2.000 | 2.000 | 1.986 |
| <sup>3</sup> TS2 <sub>IS</sub>  | 1.934 | 1.228 | 1.400              | 144.4  | 167.2                | 2.146               | 1.986   | 1.991 | 1.992 | 1.984 |
| <sup>3</sup> TS2 <sub>LS</sub>  | 1.904 | 1.267 | 1.342              | 132.6  | 171.5                | 2.068               | 1.973   | 1.978 | 1.981 | 1.970 |
| <sup>5</sup> Int2 <sub>HS</sub> | 2.129 | 0.979 | -                  | -      | -                    | 1.982               | 2.08394 | 2.092 | 2.145 | 2.116 |
| <sup>3</sup> Int2 <sub>IS</sub> | 1.763 | 0.971 | -                  | -      | -                    | 2.213               | 1.99651 | 1.984 | 1.996 | 1.984 |
| <sup>1</sup> Int2 <sub>LS</sub> | 2.142 | 0.978 | -                  | -      | -                    | 1.984               | 1.98250 | 1.980 | 1.998 | 1.992 |
| Co-oxyl                         |       |       |                    |        |                      |                     |         |       |       |       |
| Species                         | Co-O  | O-H   | H-C <sub>DHA</sub> | Co-O-H | O-H-C <sub>DHA</sub> | Co-C <sub>NHC</sub> | Co-N1   | Co-N2 | Co-N3 | Co-N4 |
| <sup>6</sup> 2 <sub>HS</sub>    | 1.924 | -     | -                  | -      | -                    | 2.277               | 2.068   | 2.097 | 2.033 | 2.066 |
| <sup>4</sup> 2 <sub>IS</sub>    | 1.698 | -     | -                  | -      | -                    | 2.115               | 2.103   | 1.992 | 2.103 | 1.992 |
| <sup>2</sup> 2 <sub>LS</sub>    | 1.854 | -     | -                  | -      | -                    | 2.058               | 1.954   | 1.960 | 1.954 | 1.960 |
| <sup>6</sup> TS1 <sub>HS</sub>  | 1.893 | 1.396 | 1.213              | 110.9  | 156.3                | 2.327               | 2.064   | 2.053 | 2.042 | 2.069 |
| <sup>4</sup> TS1 <sub>IS</sub>  | 1.768 | 1.315 | 1.258              | 117.3  | 156.3                | 2.124               | 1.984   | 2.101 | 1.976 | 2.099 |
| <sup>2</sup> TS1 <sub>LS</sub>  | 1.873 | 1.309 | 1.254              | 113.6  | 159.1                | 2.054               | 1.954   | 1.960 | 1.954 | 1.952 |
| <sup>5</sup> Int1 <sub>HS</sub> | 1.865 | 0.980 | -                  | 116.7  | -                    | 2.373               | 2.032   | 2.073 | 2.079 | 2.068 |
| <sup>3</sup> Int1 <sub>IS</sub> | 1.830 | 0.982 | -                  | 109.1  | -                    | 2.138               | 1.974   | 2.103 | 1.961 | 2.109 |
| <sup>1</sup> Int1 <sub>LS</sub> | 1.893 | 0.981 | -                  | 105.8  | -                    | 2.050               | 1.958   | 1.958 | 1.951 | 1.959 |
| <sup>6</sup> TS2 <sub>HS</sub>  | 2.096 | 1.332 | 1.272              | 117.1  | 165.7                | 2.272               | 2.045   | 2.088 | 2.104 | 2.060 |

|                                 |       |       |       |       |       |       |       |       |       |       |
|---------------------------------|-------|-------|-------|-------|-------|-------|-------|-------|-------|-------|
| <sup>4</sup> TS2 <sub>HS</sub>  | 1.926 | 1.479 | 1.202 | 132.4 | 170.9 | 2.177 | 2.014 | 2.093 | 2.019 | 2.086 |
| <sup>4</sup> TS2 <sub>IS</sub>  | 1.926 | 1.478 | 1.202 | 132.4 | 170.8 | 2.177 | 2.014 | 2.093 | 2.018 | 2.086 |
| <sup>2</sup> TS2 <sub>LS</sub>  | 1.942 | 1.276 | 1.352 | 123.7 | 166.2 | 1.994 | 1.945 | 1.953 | 1.958 | 1.949 |
| <sup>4</sup> Int2 <sub>HS</sub> | 2.195 | 0.977 | -     | -     | -     | 2.294 | 2.084 | 2.085 | 2.066 | 2.061 |
| <sup>2</sup> Int2 <sub>LS</sub> | 2.069 | 0.977 | -     | -     | -     | 1.937 | 1.959 | 1.955 | 1.950 | 1.944 |

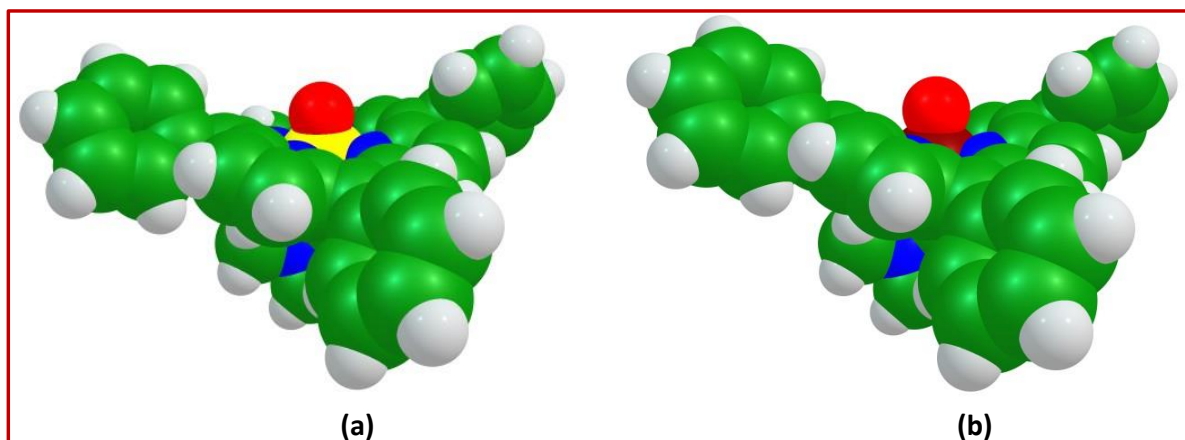

Fig. S1 van der Waal's images for oxidants a) species 1 and b) 2.

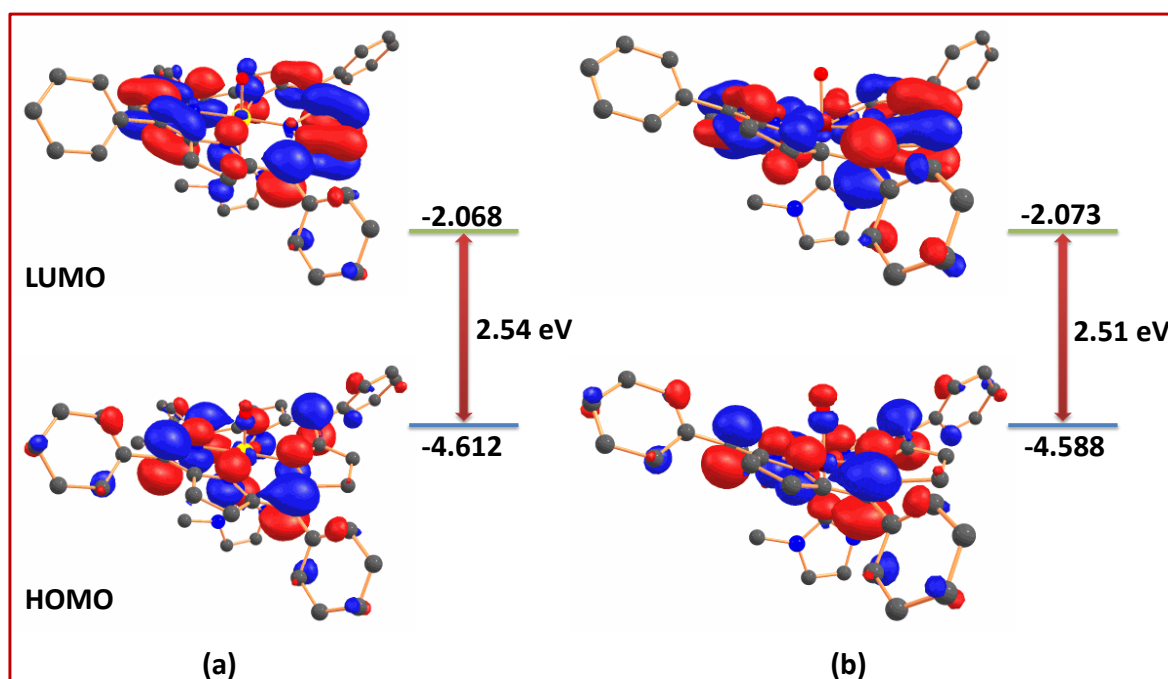

Fig. S2 Computed frontier molecular orbitals (FMOs) of (a) species 1, and (b) 2.

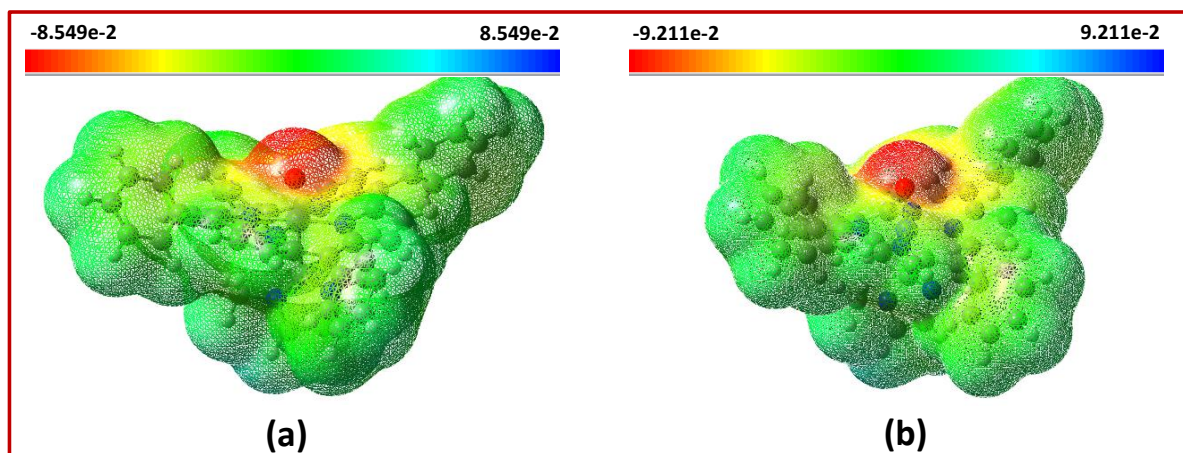

Fig. S3 Computed molecular electrostatic potential (MEP) maps of (a) species 1, and (b) 2.

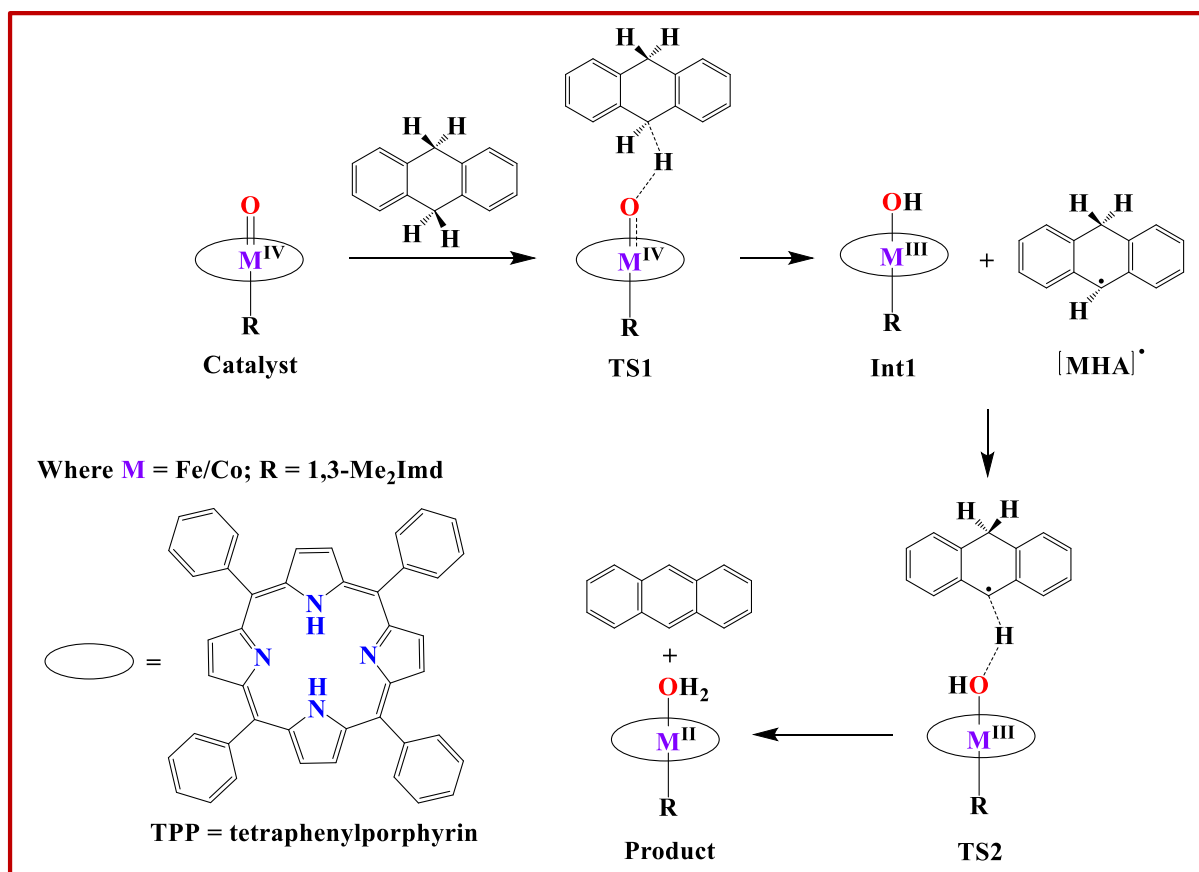

Scheme S1 Plausible mechanism adopted for the C–H bond activation reaction by species 1 and 2.

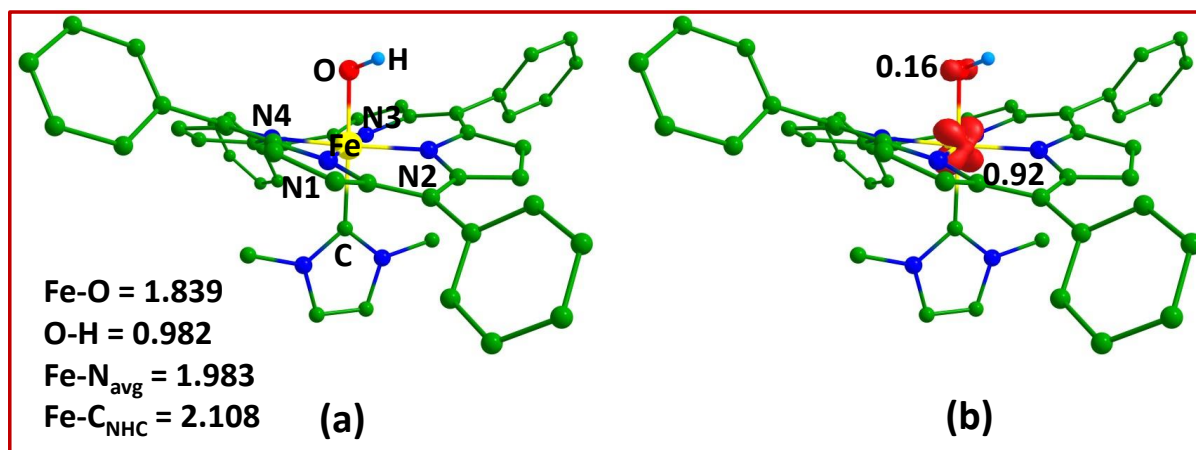

Fig. S4 (a) Optimized structure and key geometric parameters, and (b) spin density plot of ground spin state of Int1 of species 1.

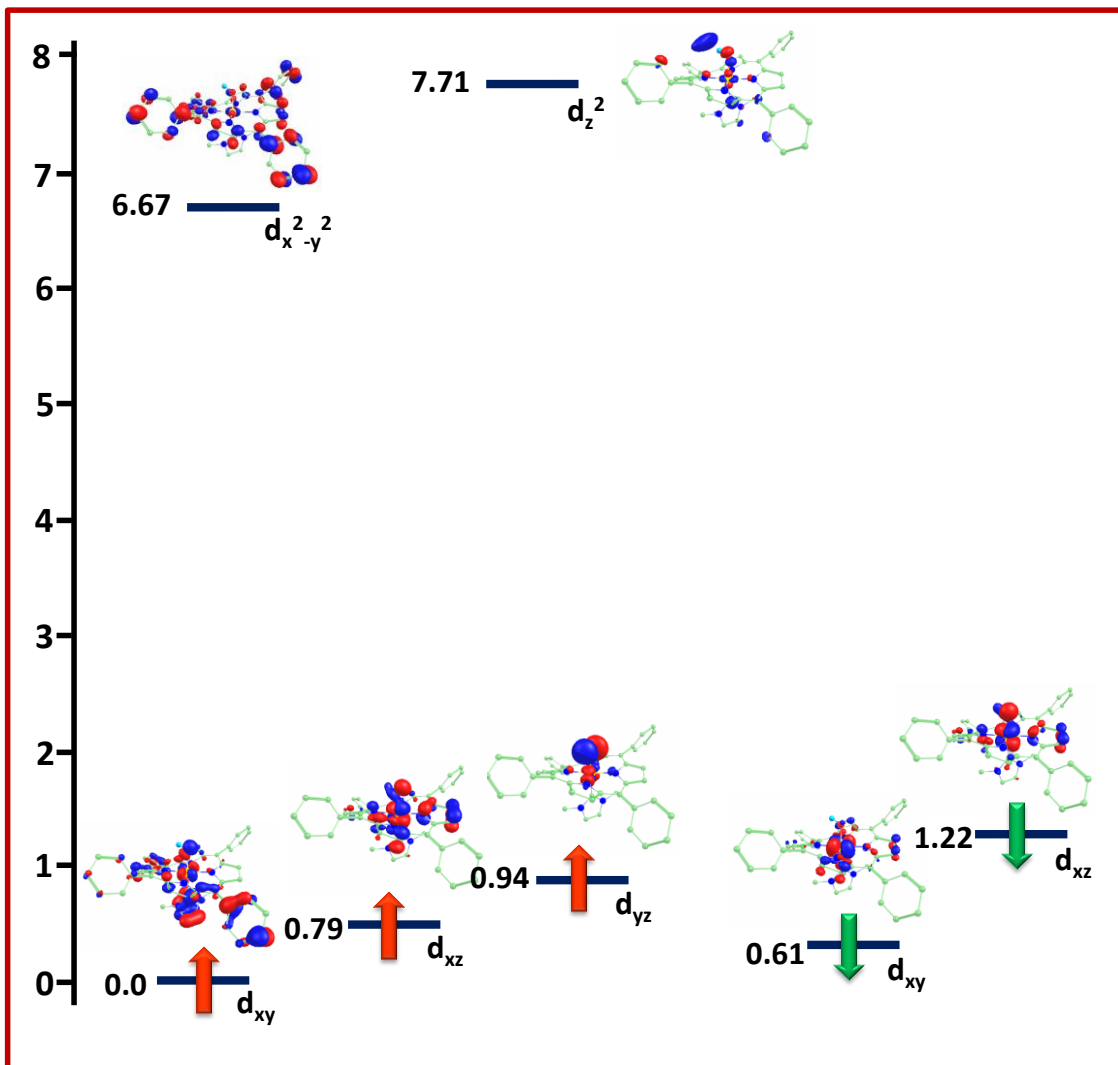

**Fig. S5** DFT computed frontier d-based qualitative molecular orbital diagram of ground spin state of **Int1** of species **1**. (Given energy in eV)

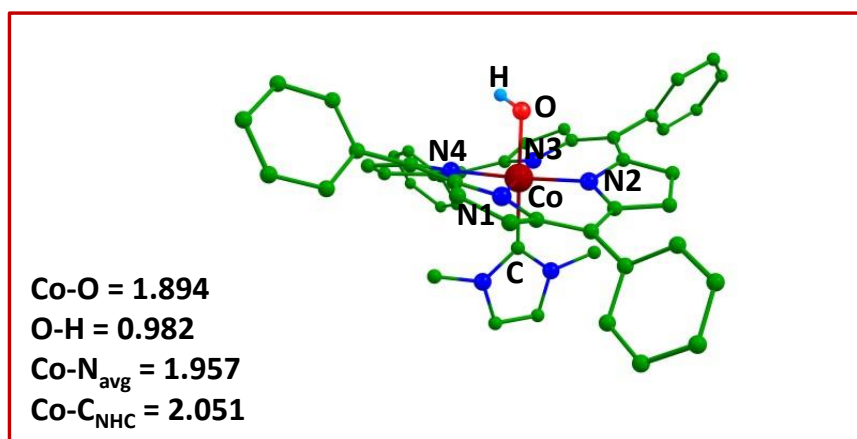

**Fig. S6** Optimized structure and key geometric parameters of ground spin state of **Int1'** of species **2**.

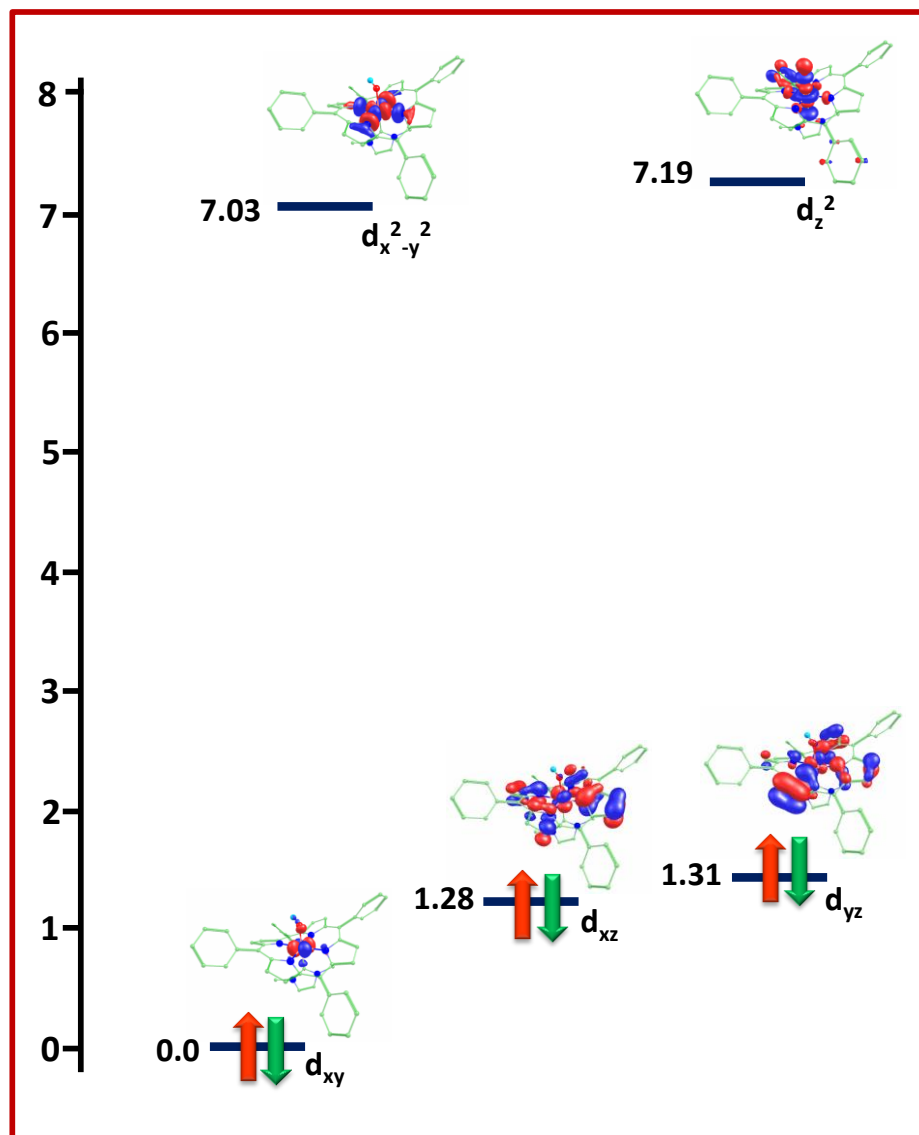

**Fig. S7** DFT computed frontier d-based qualitative molecular orbital diagram of ground spin state of Int1' of species 2. (Given energy in eV)



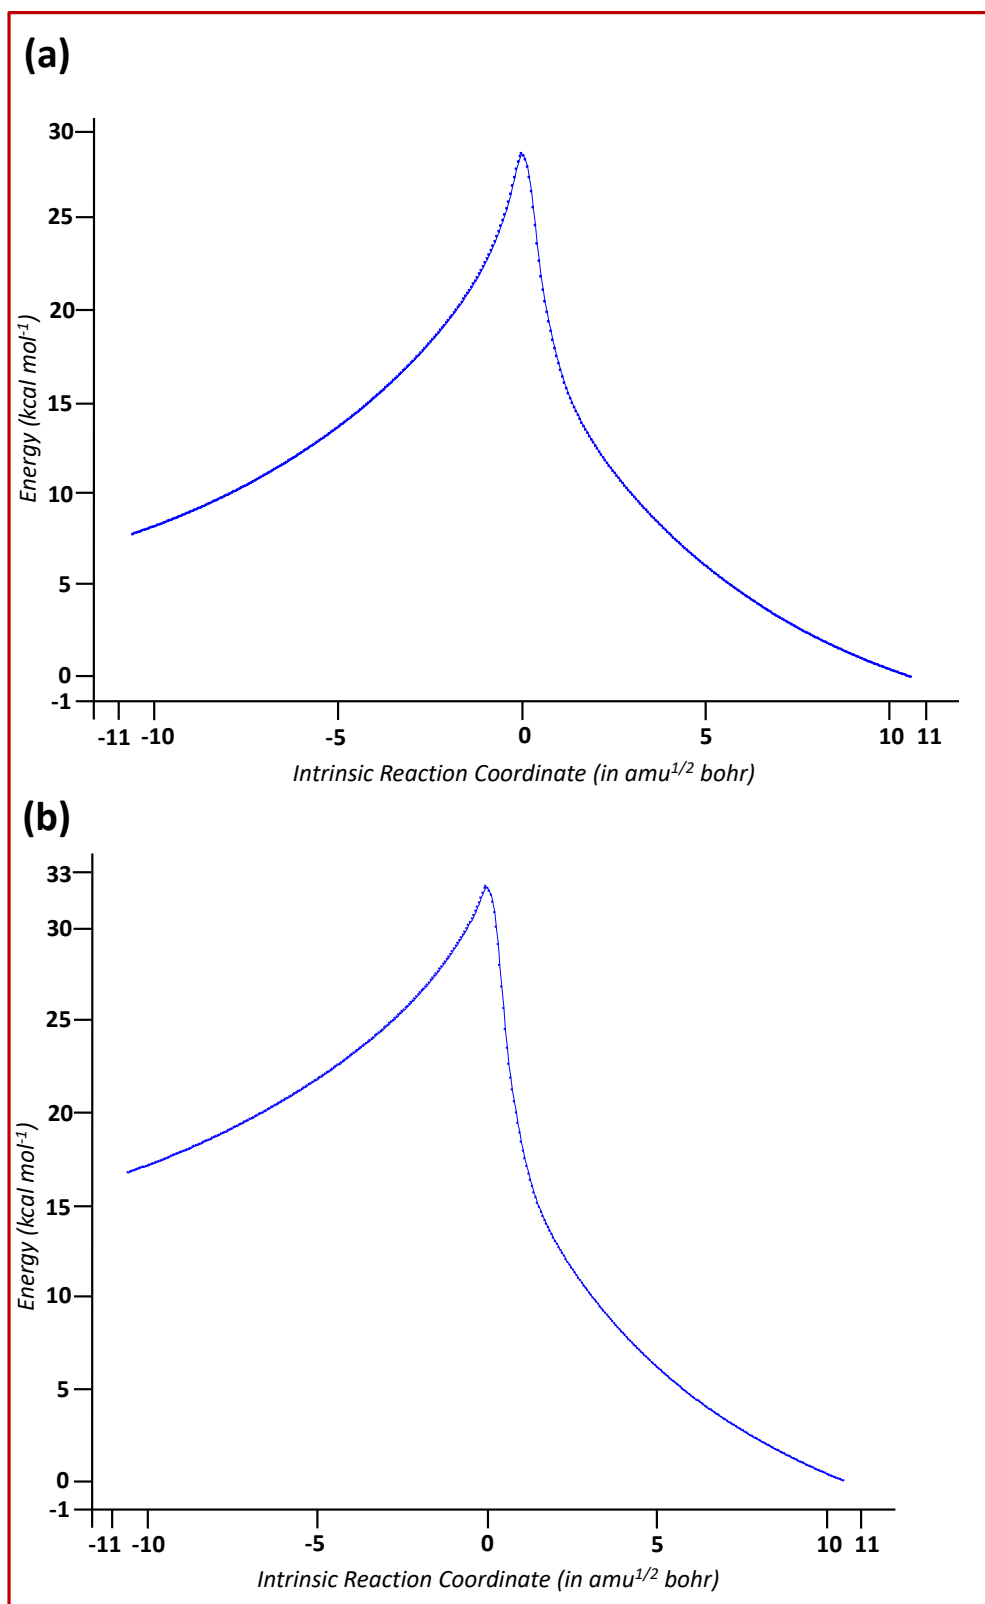

**Fig. S8** Potential Energy ( $E$ , in kcal mol<sup>-1</sup>) vs. Intrinsic Reaction Coordinate (in amu<sup>1/2</sup> bohr) for first H-abstraction from DHA by (a) species **1** and (b) **2**.

**Table S3** Possible interactions of Fe<sup>III</sup>-OH(Int1) and Co<sup>III</sup>-OH(Int1') with MHA molecule in second transition state.

| Species                           | Valence Electrons | CH' <sub>(MHA)</sub> | Possible Interaction |
|-----------------------------------|-------------------|----------------------|----------------------|
| <sup>7</sup> TS2-Fe <sub>HS</sub> | ↑↑↑↑↑             | ↑                    | Ferromagnetic        |
| <sup>5</sup> TS2-Fe <sub>HS</sub> | ↑↑↑↑↑             | ↓                    | Anti-Ferromagnetic   |
| <sup>5</sup> TS2-Fe <sub>IS</sub> | ↑↓↑↑↑             | ↑                    | Ferromagnetic        |
| <sup>3</sup> TS2-Fe <sub>IS</sub> | ↑↓↑↑↑             | ↓                    | Anti-Ferromagnetic   |
| <sup>3</sup> TS2-Fe <sub>LS</sub> | ↑↓↑↓↑             | ↑                    | Ferromagnetic        |
| <sup>1</sup> TS2-Fe <sub>LS</sub> | ↑↓↑↓↑             | ↓                    | Anti-Ferromagnetic   |
| <sup>6</sup> TS2-Co <sub>HS</sub> | ↑↓↑↑↑↑            | ↑                    | Ferromagnetic        |
| <sup>4</sup> TS2-Co <sub>HS</sub> | ↑↓↑↑↑↑            | ↓                    | Anti-Ferromagnetic   |
| <sup>4</sup> TS2-Co <sub>IS</sub> | ↑↓↑↓↑↑            | ↑                    | Ferromagnetic        |
| <sup>2</sup> TS2-Co <sub>IS</sub> | ↑↓↑↓↑↑            | ↓                    | Anti-Ferromagnetic   |
| <sup>2</sup> TS2-Co <sub>LS</sub> | ↑↓↑↓↑↓            | ↑                    | Ferromagnetic        |

**Table S4** Mulliken atomic charges and spin density of the species **1**, **2** and respective intermediates in the C-H bond activation.

| System           | Spin State       | Mulliken atomic charges |        |                      |                      | Spin density |        |                      |                      |
|------------------|------------------|-------------------------|--------|----------------------|----------------------|--------------|--------|----------------------|----------------------|
|                  |                  | Fe                      | O      | C <sub>DHA/MHA</sub> | H <sub>DHA/MHA</sub> | Fe           | O      | C <sub>DHA/MHA</sub> | H <sub>DHA/MHA</sub> |
| <b>Species 1</b> | HS               | 0.561                   | -0.304 | -                    | -                    | 2.950        | 0.805  | -                    | -                    |
|                  | IS               | 0.379                   | -0.285 | -                    | -                    | 1.047        | 1.034  | -                    | -                    |
|                  | LS               | 0.353                   | -0.303 | -                    | -                    | 0.000        | 0.000  | -                    | -                    |
| <b>TS1</b>       | HS               | 0.575                   | -0.470 | -0.461               | 0.340                | 2.854        | 0.553  | 0.353                | -0.064               |
|                  | IS               | 0.414                   | -0.455 | -0.452               | 0.333                | 0.965        | 0.707  | 0.375                | -0.076               |
|                  | LS               | 0.356                   | -0.442 | -0.436               | 0.312                | 0.000        | 0.000  | 0.000                | 0.00                 |
| <b>Int1</b>      | HS               | 0.767                   | -0.658 | -                    | -                    | 4.063        | 0.395  | -                    | -                    |
|                  | IS               | 0.569                   | -0.653 | -                    | -                    | 2.606        | 0.366  | -                    | -                    |
|                  | LS               | 0.383                   | -0.562 | -                    | -                    | 0.924        | 0.158  | -                    | -                    |
| <b>TS2</b>       | HS <sub>F</sub>  | 0.827                   | -0.721 | -0.573               | 0.415                | 4.123        | 0.163  | 0.055                | 0.018                |
|                  | HS <sub>AF</sub> | 0.650                   | -0.660 | -0.548               | 0.381                | 3.232        | -0.092 | -0.081               | 0.042                |
|                  | IS <sub>F</sub>  | 0.645                   | -0.716 | -0.562               | 0.396                | 2.742        | 0.172  | 0.049                | 0.018                |
|                  | IS <sub>AF</sub> | 0.529                   | -0.689 | -0.561               | 0.420                | 1.173        | 0.012  | 0.016                | 0.039                |
|                  | LS <sub>F</sub>  | 0.526                   | -0.686 | -0.577               | 0.421                | 1.064        | 0.047  | 0.039                | 0.026                |
|                  | LS <sub>AF</sub> | -                       | -      | -                    | -                    | -            | -      | -                    | -                    |
| <b>P</b>         | HS               | 0.627                   | -0.653 | -                    | -                    | 3.743        | 0.028  | -                    | -                    |
|                  | IS               | 0.518                   | -0.674 | -                    | -                    | 1.059        | 0.025  | -                    | -                    |
|                  | LS               | 0.324                   | -0.640 | -                    | -                    | 0.000        | 0.000  | -                    | -                    |
|                  |                  | Co                      | O      | C <sub>DHA/MHA</sub> | H <sub>DHA/MHA</sub> | Co           | O      | C <sub>DHA/MHA</sub> | H <sub>DHA/MHA</sub> |
| <b>Species 2</b> | HS               | 0.607                   | -0.223 | -                    | -                    | 2.803        | 1.576  | -                    | -                    |
|                  | IS               | 0.457                   | -0.233 | -                    | -                    | 1.610        | 1.178  | -                    | -                    |
|                  | LS               | 0.416                   | -0.325 | -                    | -                    | -0.061       | 1.048  | -                    | -                    |
| <b>TS1'</b>      | HS               | 0.589                   | -0.416 | -0.455               | 0.301                | 2.824        | 1.192  | 0.312                | -0.062               |
|                  | IS               | 0.474                   | -0.433 | -0.453               | 0.319                | 1.636        | 0.786  | 0.351                | -0.069               |
|                  | LS               | 0.413                   | -0.470 | -0.436               | 0.312                | -0.037       | 0.673  | 0.356                | -0.083               |
| <b>Int1'</b>     | HS               | 0.628                   | -0.594 | -                    | -                    | 2.900        | 0.501  | -                    | -                    |
|                  | IS               | 0.460                   | -0.564 | -                    | -                    | 1.645        | 0.208  | -                    | -                    |
|                  | LS               | 0.357                   | -0.594 | -                    | -                    | 0.000        | 0.000  | -                    | -                    |
| <b>TS2'</b>      | HS <sub>F</sub>  | 0.537                   | -0.650 | -0.515               | 0.367                | 2.701        | 0.309  | 0.209                | -0.005               |
|                  | HS <sub>AF</sub> | 0.545                   | -0.651 | -0.535               | 0.367                | 1.787        | 0.075  | -0.010               | 0.040                |
|                  | IS <sub>F</sub>  | 0.545                   | -0.651 | -0.535               | 0.367                | 2.202        | -0.062 | -0.075               | 0.035                |
|                  | IS <sub>AF</sub> | -                       | -      | -                    | -                    | -            | -      | -                    | -                    |
|                  | LS <sub>F</sub>  | 0.472                   | -0.672 | -0.556               | 0.405                | 0.021        | 0.011  | 0.041                | 0.026                |
| <b>P'</b>        | HS               | 0.491                   | -0.651 | -                    | -                    | 2.679        | 0.024  | -                    | -                    |
|                  | LS               | 0.421                   | -0.634 | -                    | -                    | -0.006       | -0.001 | -                    | -                    |

*LS<sub>AF</sub> (TS2) and IS<sub>AF</sub> (TS2)' = these species have convergence issue*

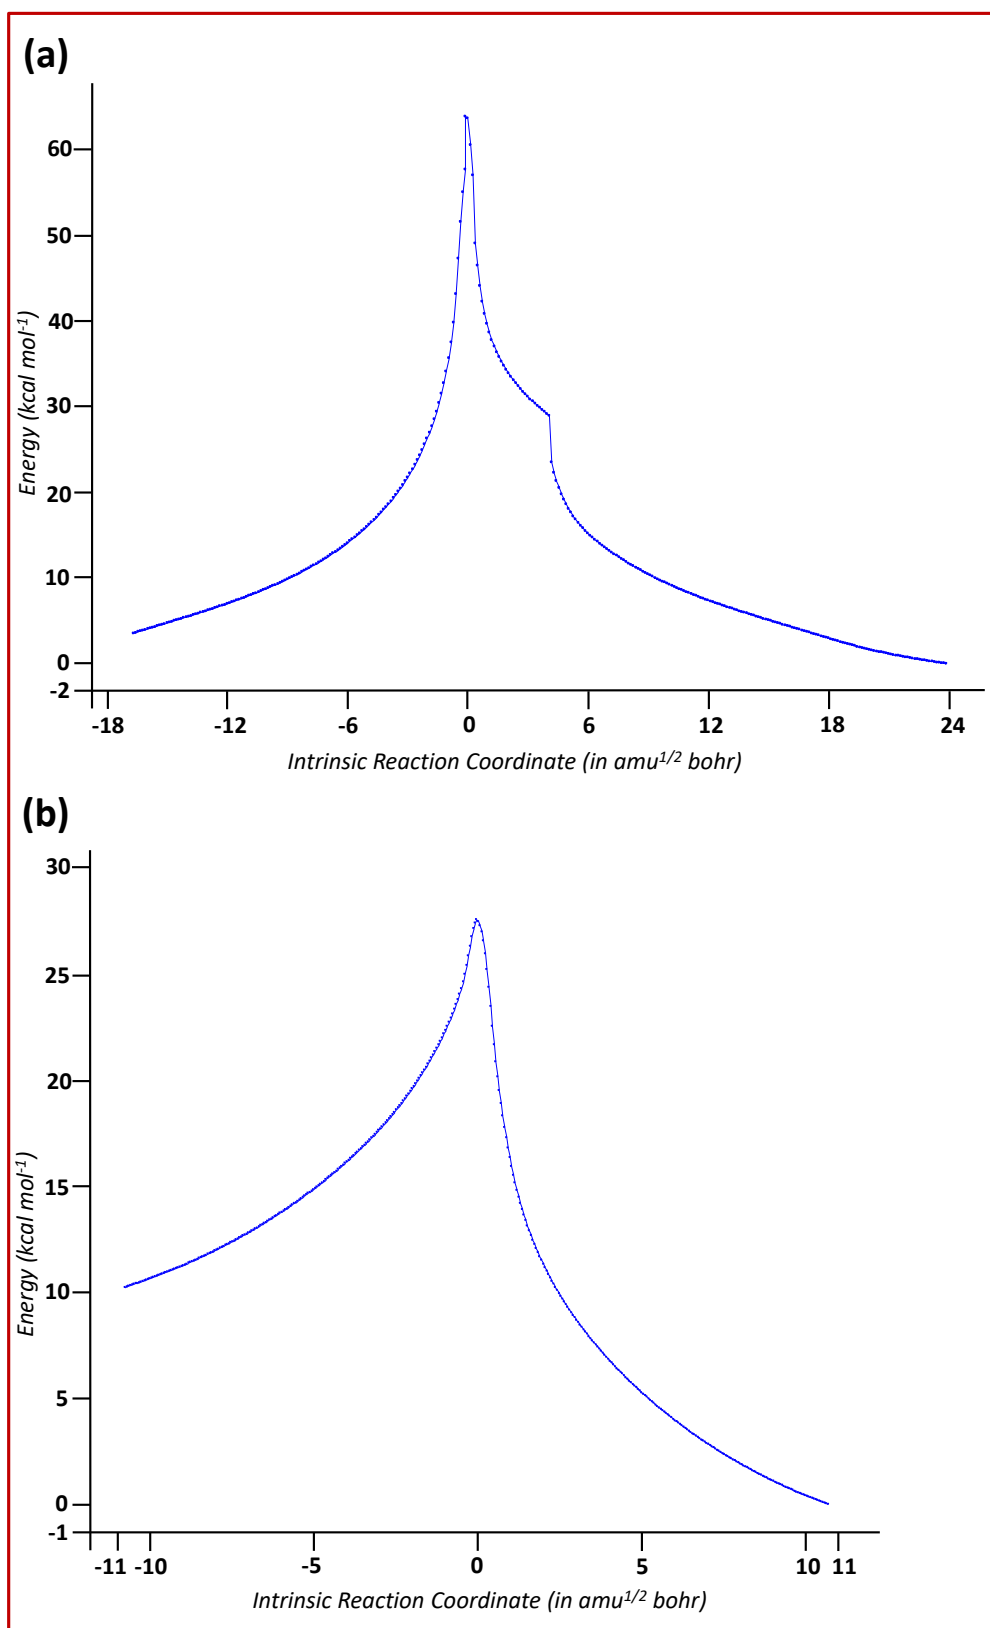

**Fig. S9** Potential Energy ( $E$ , in kcal mol<sup>-1</sup>) vs. Intrinsic Reaction Coordinate (in amu<sup>1/2</sup> bohr) for **TS2** and **TS2'** by (a) species **1** and (b) **2**, respectively.

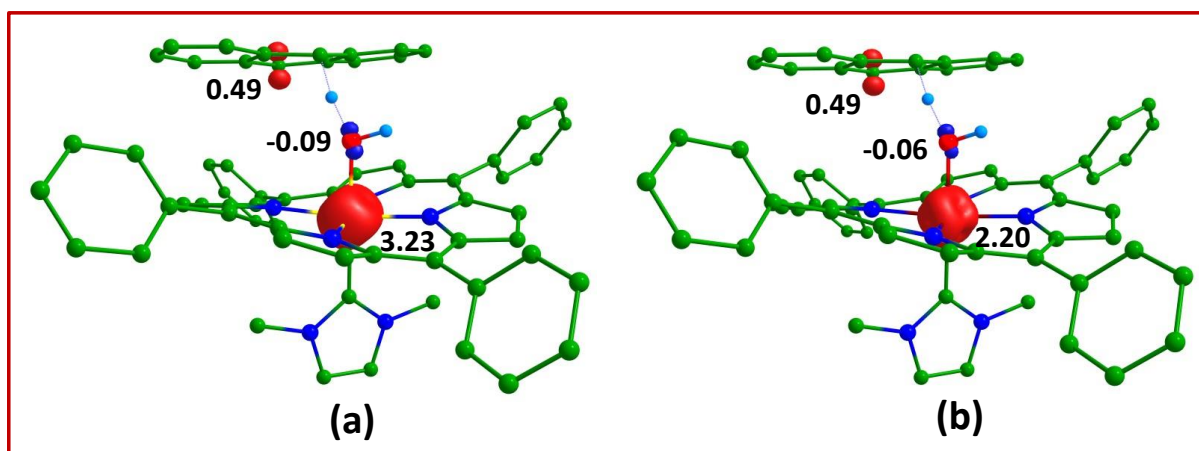

**Fig. S10** The computed spin density plots (a) for species **1** and (b) for species **2** of the second transition state (**TS2**). Contour value = 0.03.

**Table S5** Comparison of computed barrier height for C-H bond activation of DHA substrate by  $\text{Fe}^{\text{IV}}=\text{O}$ .

| Sr. No. | Species                                                                        | $\Delta G(\text{kJ/mol})$ | References |
|---------|--------------------------------------------------------------------------------|---------------------------|------------|
| 1       | $[\text{Fe}^{\text{IV}}(\text{O})(\text{TMG}_3\text{tren})]^{+2}$              | 60.3                      | 1          |
| 2       | $[\text{Fe}^{\text{IV}}(\text{O})(\text{TMG}_2\text{dien})(\text{MeCN})]^{+2}$ | 45.6                      | 1          |
| 3       | $[\text{Fe}^{\text{IV}}(\text{O})(\text{tBu}_3\text{tacn})]^{+2}$              | 111.0                     | 2          |
| 4       | $[\text{Fe}^{\text{IV}}(\text{O})(\text{H}_3\text{buea})]^-$                   | 119.6                     | 3          |
| 5       | $[\text{Fe}^{\text{IV}}(\text{O})(\text{H1}^{\text{cvp}})]^-$                  | 88.2                      | 4          |
| 6       | $[\text{Fe}^{\text{IV}}(\text{O})(\text{TMC})(\text{CH}_3\text{CN})]^{+2}$     | 108.3                     | 5          |
| 7       | $[\text{Fe}^{\text{IV}}(\text{O})(\text{TMC})(\text{CH}_2\text{S})]^+$         | 110.4                     | 5          |
| 8       | $[\text{Fe}^{\text{IV}}(\text{O})(\text{TMC})(\text{N}_3)]^+$                  | 106.2                     | 5          |
| 9       | $[\text{Fe}^{\text{IV}}(\text{O})(\text{Bn-TPEN})]^{+2}$                       | 60.2                      | 6          |
| 10      | $[\text{Fe}^{\text{IV}}(\text{O})(\text{TPP})(1,3\text{-Me}_2\text{Imd})]$     | 44.6                      | This work  |

## References

- 1 J. E. M. N. Klein, B. Dereli, L. Que and C. J. Cramer, *Chem. Commun.*, 2016, **52**, 10509–10512.
- 2 K. Warm, A. Paskin, U. Kuhlmann, E. Bill, M. Swart, M. Haumann, H. Dau, P. Hildebrandt and K. Ray, *Angew. Chem., Int. Ed.*, 2021, **60**, 6752–6756.
- 3 A. Sen, A. Ansari, A. Swain, B. Pandey and G. Rajaraman, *Inorg. Chem.*, 2023, **62**, 14931–14941.
- 4 D. Usharani, D. C. Lacy, A. S. Borovik and S. Shaik, *J. Am. Chem. Soc.*, 2013, **135**, 17090–17104.
- 5 D. Mandal, R. Ramanan, D. Usharani, D. Janardanan, B. Wang and S. Shaik *J. Am. Chem. Soc.*, 2015, **137**, 722–733.
- 6 D. Mandal and S. Shaik, *J. Am. Chem. Soc.*, 2016, **138**, 2094–2097.

## XYZ Coordinates

The coordinates are given in xyz-format, and the specific multiplicity/species/spin state pair for each of the calculations is given in parenthesis in the comment line of the structure.

### Fe-based species

<sup>5</sup>1<sub>(HS)</sub>

|    |              |              |              |   |              |              |              |
|----|--------------|--------------|--------------|---|--------------|--------------|--------------|
| Fe | -0.000055000 | 0.000363000  | -0.302007000 | C | -5.306421000 | 0.343689000  | -2.294902000 |
| C  | -0.000040000 | -0.000217000 | 1.906352000  | H | -4.679231000 | -0.318320000 | -2.882483000 |
| C  | 0.677989000  | -0.026373000 | 4.107041000  | C | -6.636249000 | 0.573049000  | -2.662338000 |
| H  | 1.391230000  | -0.050202000 | 4.912727000  | H | -7.043681000 | 0.083655000  | -3.541620000 |
| C  | -0.678097000 | 0.024096000  | 4.107057000  | C | -7.438008000 | 1.436622000  | -1.904163000 |
| H  | -1.391345000 | 0.047188000  | 4.912758000  | H | -8.469944000 | 1.615421000  | -2.189787000 |
| C  | -2.493497000 | 0.085615000  | 2.405987000  | C | -6.900379000 | 2.067653000  | -0.774675000 |
| H  | -3.061958000 | 0.358848000  | 3.299381000  | H | -7.517441000 | 2.731830000  | -0.177096000 |
| H  | -2.645461000 | 0.836167000  | 1.637820000  | C | -5.570456000 | 1.837700000  | -0.406965000 |
| H  | -2.830505000 | -0.886046000 | 2.041563000  | H | -5.156160000 | 2.318396000  | 0.473076000  |
| C  | 2.493450000  | -0.086268000 | 2.406003000  | C | -0.982166000 | -4.792777000 | 0.366838000  |
| H  | 3.061940000  | -0.359568000 | 3.299360000  | C | -1.792478000 | -5.546535000 | -0.504325000 |
| H  | 2.645681000  | -0.836574000 | 1.637648000  | H | -2.226516000 | -5.060234000 | -1.371130000 |
| H  | 2.830194000  | 0.885580000  | 2.041849000  | C | -2.019566000 | -6.906943000 | -0.269957000 |
| N  | 1.075571000  | -0.042381000 | 2.768551000  | H | -2.641248000 | -7.474578000 | -0.955573000 |
| N  | -1.075650000 | 0.041251000  | 2.768573000  | C | -1.436370000 | -7.539083000 | 0.836188000  |
| N  | -1.722108000 | -1.115189000 | -0.267556000 | H | -1.612252000 | -8.595013000 | 1.016715000  |
| N  | 1.152221000  | -1.719192000 | -0.198043000 | C | -0.619083000 | -6.802489000 | 1.703594000  |
| N  | 1.722271000  | 1.115178000  | -0.267109000 | H | -0.161020000 | -7.285613000 | 2.561327000  |
| N  | -1.152431000 | 1.719394000  | -0.197576000 | C | -0.392102000 | -5.442315000 | 1.468718000  |
| C  | -2.985466000 | -0.642311000 | -0.546635000 | H | 0.241868000  | -4.868187000 | 2.136640000  |
| C  | -1.804495000 | -2.467162000 | -0.004395000 | C | 4.752935000  | -0.975441000 | -1.163729000 |
| C  | 0.647702000  | -2.994199000 | -0.081331000 | C | 5.306484000  | -0.343546000 | -2.294879000 |
| C  | 2.471511000  | -1.807195000 | -0.603538000 | H | 4.679339000  | 0.318515000  | -2.882447000 |
| C  | 2.985594000  | 0.642431000  | -0.546415000 | C | 6.636318000  | -0.572934000 | -2.662282000 |
| C  | 1.804520000  | 2.467204000  | -0.004064000 | H | 7.043798000  | -0.083514000 | -3.541527000 |
| C  | -0.647779000 | 2.994342000  | -0.080815000 | C | 7.438019000  | -1.436571000 | -1.904123000 |
| C  | -2.471656000 | 1.807430000  | -0.603170000 | H | 8.469957000  | -1.615396000 | -2.189724000 |
| C  | -3.927103000 | -1.738876000 | -0.390288000 | C | 6.900331000  | -2.067636000 | -0.774683000 |
| H  | -4.995477000 | -1.656123000 | -0.513353000 | H | 7.517347000  | -2.731871000 | -0.177123000 |
| C  | -3.209606000 | -2.847456000 | -0.027108000 | C | 5.570404000  | -1.837653000 | -0.407004000 |
| H  | -3.590478000 | -3.832512000 | 0.189478000  | H | 5.156060000  | -2.318380000 | 0.472996000  |
| C  | 1.708429000  | -3.940132000 | -0.396292000 | C | 0.982227000  | 4.792803000  | 0.367189000  |
| H  | 1.593453000  | -5.012606000 | -0.401926000 | C | 1.792337000  | 5.546535000  | -0.504174000 |
| C  | 2.814544000  | -3.213619000 | -0.743931000 | H | 2.226205000  | 5.060202000  | -1.371048000 |
| H  | 3.767793000  | -3.588512000 | -1.080739000 | C | 2.019473000  | 6.906952000  | -0.269886000 |
| C  | 3.927147000  | 1.739085000  | -0.390273000 | H | 2.641002000  | 7.474573000  | -0.955652000 |
| H  | 4.995505000  | 1.656444000  | -0.513542000 | C | 1.436527000  | 7.539108000  | 0.836382000  |
| C  | 3.209597000  | 2.847626000  | -0.027069000 | H | 1.612446000  | 8.595042000  | 1.016849000  |
| H  | 3.590422000  | 3.832730000  | 0.189378000  | C | 0.619445000  | 6.802528000  | 1.703995000  |
| C  | -1.708483000 | 3.940334000  | -0.395690000 | H | 0.161578000  | 7.285666000  | 2.561824000  |
| H  | -1.593489000 | 5.012808000  | -0.401211000 | C | 0.392412000  | 5.442347000  | 1.469195000  |
| C  | -2.814634000 | 3.213886000  | -0.743404000 | H | -0.241416000 | 4.868231000  | 2.137263000  |
| H  | -3.767851000 | 3.588858000  | -1.080214000 | O | 0.000003000  | 0.000758000  | -1.963900000 |
| C  | -3.338249000 | 0.707515000  | -0.778073000 |   |              |              |              |
| C  | -0.706668000 | -3.345695000 | 0.125635000  |   |              |              |              |
| C  | 3.338252000  | -0.707354000 | -0.778113000 |   |              |              |              |
| C  | 0.706655000  | 3.345705000  | 0.126061000  |   |              |              |              |
| C  | -4.752926000 | 0.975555000  | -1.163707000 |   |              |              |              |

<sup>3</sup><sub>1</sub>(IS)

|    |              |              |              |   |              |              |              |
|----|--------------|--------------|--------------|---|--------------|--------------|--------------|
| Fe | -0.000069000 | 0.000237000  | -0.353750000 | H | 7.626883000  | -2.304193000 | -0.562706000 |
| C  | -0.000042000 | -0.000197000 | 1.826739000  | C | 5.618205000  | -1.534999000 | -0.691640000 |
| C  | -0.678748000 | 0.012762000  | 4.028561000  | H | 5.281022000  | -2.039610000 | 0.207563000  |
| H  | -1.391881000 | 0.023856000  | 4.834793000  | C | 0.728184000  | 4.738311000  | 0.641117000  |
| C  | 0.678512000  | -0.016802000 | 4.028579000  | C | 1.518111000  | 5.622971000  | -0.118468000 |
| H  | 1.391598000  | -0.029112000 | 4.834835000  | H | 2.002122000  | 5.257261000  | -1.017371000 |
| C  | 2.492378000  | -0.035526000 | 2.317518000  | C | 1.659576000  | 6.961157000  | 0.264328000  |
| H  | 3.072551000  | -0.315798000 | 3.201294000  | H | 2.266958000  | 7.631040000  | -0.336597000 |
| H  | 2.656584000  | -0.765127000 | 1.531287000  | C | 1.008933000  | 7.440377000  | 1.408906000  |
| H  | 2.807871000  | 0.950597000  | 1.971684000  | H | 1.118473000  | 8.479227000  | 1.704254000  |
| C  | -2.492496000 | 0.035054000  | 2.317460000  | C | 0.209754000  | 6.573078000  | 2.165307000  |
| H  | -3.072414000 | 0.316331000  | 3.201090000  | H | -0.301084000 | 6.937275000  | 3.051489000  |
| H  | -2.655869000 | 0.764501000  | 1.530932000  | C | 0.068767000  | 5.235182000  | 1.782561000  |
| H  | -2.809000000 | -0.950895000 | 1.972023000  | H | -0.550495000 | 4.559667000  | 2.363892000  |
| N  | -1.075968000 | 0.024608000  | 2.689183000  | C | -4.711758000 | 0.725460000  | -1.403551000 |
| N  | 1.075829000  | -0.026301000 | 2.689213000  | C | -5.168819000 | 0.052384000  | -2.553808000 |
| N  | 1.608848000  | 1.160541000  | -0.322848000 | H | -4.473808000 | -0.573876000 | -3.103161000 |
| N  | -1.176750000 | 1.601516000  | -0.288805000 | C | -6.490730000 | 0.196283000  | -2.987464000 |
| N  | -1.608820000 | -1.160467000 | -0.323045000 | H | -6.823710000 | -0.323163000 | -3.880729000 |
| N  | 1.176594000  | -1.601301000 | -0.288863000 | C | -7.380737000 | 1.012110000  | -2.276342000 |
| C  | 2.888977000  | 0.773294000  | -0.658392000 | H | -8.406573000 | 1.124514000  | -2.613213000 |
| C  | 1.659873000  | 2.492494000  | 0.044343000  | C | -6.940110000 | 1.679801000  | -1.126221000 |
| C  | -0.771395000 | 2.895076000  | -0.040838000 | H | -7.626680000 | 2.304912000  | -0.563317000 |
| C  | -2.489736000 | 1.657119000  | -0.731253000 | C | -5.618102000 | 1.535423000  | -0.692033000 |
| C  | -2.888949000 | -0.773179000 | -0.658632000 | H | -5.280892000 | 2.040130000  | 0.207108000  |
| C  | -1.659920000 | -2.492385000 | 0.044229000  | C | -0.728142000 | -4.738103000 | 0.641458000  |
| C  | 0.771308000  | -2.894865000 | -0.040770000 | C | -1.517606000 | -5.623128000 | -0.118191000 |
| C  | 2.489620000  | -1.656934000 | -0.731246000 | H | -2.001308000 | -5.257776000 | -1.017402000 |
| C  | 3.790205000  | 1.889284000  | -0.449919000 | C | -1.658951000 | -6.961239000 | 0.264909000  |
| H  | 4.856320000  | 1.853429000  | -0.608854000 | H | -2.265964000 | -7.631405000 | -0.336073000 |
| C  | 3.042944000  | 2.931778000  | 0.025591000  | C | -1.008645000 | -7.440028000 | 1.409856000  |
| H  | 3.386271000  | 3.911157000  | 0.316475000  | H | -1.118092000 | -8.478822000 | 1.705438000  |
| C  | -1.869830000 | 3.800050000  | -0.321504000 | C | -0.209903000 | -6.572379000 | 2.166314000  |
| H  | -1.816605000 | 4.873200000  | -0.228741000 | H | 0.300681000  | -6.936245000 | 3.052777000  |
| C  | -2.909072000 | 3.043928000  | -0.786192000 | C | -0.069030000 | -5.234560000 | 1.783261000  |
| H  | -3.868967000 | 3.385644000  | -1.137837000 | H | 0.549886000  | -4.558772000 | 2.364641000  |
| C  | -3.790221000 | -1.889121000 | -0.450119000 | O | -0.000025000 | 0.000267000  | -2.025338000 |
| H  | -4.856334000 | -1.853234000 | -0.609054000 |   |              |              |              |
| C  | -3.043011000 | -2.931608000 | 0.025482000  |   |              |              |              |
| H  | -3.386397000 | -3.910933000 | 0.316468000  |   |              |              |              |
| C  | 1.869750000  | -3.799840000 | -0.321380000 |   |              |              |              |
| H  | 1.816513000  | -4.872984000 | -0.228570000 |   |              |              |              |
| C  | 2.908961000  | -3.043743000 | -0.786151000 |   |              |              |              |
| H  | 3.868839000  | -3.385465000 | -1.137825000 |   |              |              |              |
| C  | 3.305321000  | -0.537605000 | -0.951597000 |   |              |              |              |
| C  | 0.539943000  | 3.313536000  | 0.247192000  |   |              |              |              |
| C  | -3.305333000 | 0.537750000  | -0.951744000 |   |              |              |              |
| C  | -0.540004000 | -3.313394000 | 0.247264000  |   |              |              |              |
| C  | 4.711783000  | -0.725275000 | -1.403335000 |   |              |              |              |
| C  | 5.168826000  | -0.052262000 | -2.553631000 |   |              |              |              |
| H  | 4.473770000  | 0.573854000  | -3.103090000 |   |              |              |              |
| C  | 6.490778000  | -0.196050000 | -2.987201000 |   |              |              |              |
| H  | 6.823742000  | 0.323330000  | -3.880511000 |   |              |              |              |
| C  | 7.380850000  | -1.011674000 | -2.275931000 |   |              |              |              |
| H  | 8.406720000  | -1.123984000 | -2.612730000 |   |              |              |              |
| C  | 6.940255000  | -1.679262000 | -1.125738000 |   |              |              |              |

<sup>1</sup><sub>1</sub>(LS)

|    |              |              |              |   |              |              |              |
|----|--------------|--------------|--------------|---|--------------|--------------|--------------|
| Fe | 0.000248000  | -0.000318000 | -0.368970000 | H | 7.580234000  | -2.469138000 | -0.605014000 |
| C  | 0.000358000  | -0.001254000 | 1.809421000  | C | 5.586226000  | -1.660708000 | -0.720114000 |
| C  | -0.678390000 | 0.009784000  | 4.011995000  | H | 5.250878000  | -2.145059000 | 0.190825000  |
| H  | -1.391012000 | 0.022549000  | 4.818683000  | C | 0.845183000  | 4.701106000  | 0.676783000  |
| C  | 0.679083000  | -0.026115000 | 4.011882000  | C | 1.639455000  | 5.582692000  | -0.081901000 |
| H  | 1.391676000  | -0.043974000 | 4.818498000  | H | 2.101051000  | 5.222640000  | -0.994762000 |
| C  | 2.493402000  | -0.052137000 | 2.303307000  | C | 1.813138000  | 6.911534000  | 0.319737000  |
| H  | 3.071178000  | -0.325549000 | 3.190819000  | H | 2.423397000  | 7.579308000  | -0.280632000 |
| H  | 2.656465000  | -0.790210000 | 1.524935000  | C | 1.190830000  | 7.384616000  | 1.482488000  |
| H  | 2.813619000  | 0.928957000  | 1.948275000  | H | 1.325366000  | 8.416288000  | 1.792326000  |
| C  | -2.492592000 | 0.048681000  | 2.303597000  | C | 0.387532000  | 6.520648000  | 2.238376000  |
| H  | -3.069489000 | 0.324563000  | 3.190929000  | H | -0.101431000 | 6.880118000  | 3.138721000  |
| H  | -2.653046000 | 0.786839000  | 1.524862000  | C | 0.214463000  | 5.192045000  | 1.836948000  |
| H  | -2.815944000 | -0.931599000 | 1.948987000  | H | -0.407892000 | 4.519091000  | 2.418005000  |
| N  | -1.075596000 | 0.026459000  | 2.673364000  | C | -4.687912000 | 0.843774000  | -1.431270000 |
| N  | 1.076364000  | -0.034004000 | 2.673195000  | C | -5.144883000 | 0.195251000  | -2.595714000 |
| N  | 1.640230000  | 1.122458000  | -0.350249000 | H | -4.455969000 | -0.437885000 | -3.144843000 |
| N  | -1.142336000 | 1.617014000  | -0.266934000 | C | -6.458121000 | 0.372427000  | -3.043033000 |
| N  | -1.640336000 | -1.121274000 | -0.350652000 | H | -6.790905000 | -0.128269000 | -3.947006000 |
| N  | 1.142194000  | -1.616198000 | -0.268399000 | C | -7.339601000 | 1.197281000  | -2.331688000 |
| C  | 2.906447000  | 0.708371000  | -0.693493000 | H | -8.358747000 | 1.335498000  | -2.679112000 |
| C  | 1.724458000  | 2.449493000  | 0.025815000  | C | -6.899324000 | 1.840238000  | -1.167417000 |
| C  | -0.702003000 | 2.897405000  | -0.002631000 | H | -7.579814000 | 2.471576000  | -0.604067000 |
| C  | -2.453428000 | 1.711288000  | -0.710726000 | C | -5.586008000 | 1.662682000  | -0.719412000 |
| C  | -2.906589000 | -0.706993000 | -0.693709000 | H | -5.250418000 | 2.146923000  | 0.191494000  |
| C  | -1.724552000 | -2.448647000 | 0.024430000  | C | -0.845419000 | -4.700580000 | 0.674413000  |
| C  | 0.701966000  | -2.896698000 | -0.004131000 | C | -1.639504000 | -5.581872000 | -0.084795000 |
| C  | 2.453541000  | -1.710077000 | -0.711624000 | H | -2.100800000 | -5.221497000 | -0.997683000 |
| C  | 3.835849000  | 1.804023000  | -0.494394000 | C | -1.813443000 | -6.910815000 | 0.316407000  |
| H  | 4.899545000  | 1.743794000  | -0.662323000 | H | -2.423566000 | -7.578366000 | -0.284349000 |
| C  | 3.116917000  | 2.860661000  | -0.007069000 | C | -1.191571000 | -7.384280000 | 1.479237000  |
| H  | 3.485215000  | 3.830586000  | 0.285102000  | H | -1.326306000 | -8.416025000 | 1.788743000  |
| C  | -1.780591000 | 3.830323000  | -0.261113000 | C | -0.388485000 | -6.520585000 | 2.235664000  |
| H  | -1.701567000 | 4.900226000  | -0.151632000 | H | 0.100119000  | -6.880348000 | 3.136087000  |
| C  | -2.838366000 | 3.107111000  | -0.738089000 | C | -0.215183000 | -5.191874000 | 1.834682000  |
| H  | -3.789308000 | 3.478424000  | -1.083694000 | H | 0.406976000  | -4.519118000 | 2.416182000  |
| C  | -3.835899000 | -1.802807000 | -0.495354000 | O | -0.000459000 | 0.003302000  | -2.040266000 |
| H  | -4.899598000 | -1.742481000 | -0.663221000 |   |              |              |              |
| C  | -3.116956000 | -2.859772000 | -0.008710000 |   |              |              |              |
| H  | -3.485268000 | -3.829904000 | 0.282768000  |   |              |              |              |
| C  | 1.780884000  | -3.829282000 | -0.262212000 |   |              |              |              |
| H  | 1.702137000  | -4.899211000 | -0.152769000 |   |              |              |              |
| C  | 2.838676000  | -3.105816000 | -0.738871000 |   |              |              |              |
| H  | 3.789789000  | -3.476995000 | -1.084147000 |   |              |              |              |
| C  | 3.291883000  | -0.615795000 | -0.967390000 |   |              |              |              |
| C  | 0.623489000  | 3.286518000  | 0.264314000  |   |              |              |              |
| C  | -3.291971000 | 0.617266000  | -0.966937000 |   |              |              |              |
| C  | -0.623552000 | -3.285857000 | 0.262450000  |   |              |              |              |
| C  | 4.687855000  | -0.841983000 | -1.431828000 |   |              |              |              |
| C  | 5.144568000  | -0.193255000 | -2.596263000 |   |              |              |              |
| H  | 4.455461000  | 0.439788000  | -3.145260000 |   |              |              |              |
| C  | 6.457802000  | -0.370094000 | -3.043729000 |   |              |              |              |
| H  | 6.790379000  | 0.130769000  | -3.947687000 |   |              |              |              |
| C  | 7.339546000  | -1.194802000 | -2.332542000 |   |              |              |              |
| H  | 8.358686000  | -1.332764000 | -2.680084000 |   |              |              |              |
| C  | 6.899539000  | -1.837931000 | -1.168266000 |   |              |              |              |



<sup>5</sup>RC<sub>(HS)</sub>

|    |              |              |              |   |              |              |              |
|----|--------------|--------------|--------------|---|--------------|--------------|--------------|
| Fe | 0.000051000  | -0.000489000 | 0.838231000  | C | 5.952398000  | -4.099257000 | 0.363693000  |
| O  | -0.000061000 | 0.000000000  | -0.820778000 | H | 6.406696000  | -4.837762000 | 1.017231000  |
| C  | 0.000293000  | -0.001130000 | 3.139967000  | C | 4.787038000  | -3.438778000 | 0.767080000  |
| C  | -0.622838000 | 0.265544000  | 5.346466000  | H | 4.343290000  | -3.664919000 | 1.731672000  |
| H  | -1.275268000 | 0.540331000  | 6.156896000  | C | 2.509819000  | 4.248449000  | 1.364568000  |
| C  | 0.623923000  | -0.268756000 | 5.346211000  | C | 3.392598000  | 4.740140000  | 0.383418000  |
| H  | 1.276536000  | -0.543891000 | 6.156377000  | H | 3.533868000  | 4.176099000  | -0.532674000 |
| C  | 2.303232000  | -0.967858000 | 3.645413000  | C | 4.068908000  | 5.950087000  | 0.572147000  |
| H  | 2.725440000  | -1.455704000 | 4.526968000  | H | 4.740858000  | 6.315987000  | -0.198050000 |
| H  | 2.192946000  | -1.698838000 | 2.851193000  | C | 3.873976000  | 6.691885000  | 1.743271000  |
| H  | 2.973835000  | -0.172722000 | 3.316698000  | H | 4.399250000  | 7.630577000  | 1.888782000  |
| C  | -2.302583000 | 0.965270000  | 3.646361000  | C | 2.993554000  | 6.218139000  | 2.722902000  |
| H  | -2.724732000 | 1.452475000  | 4.528296000  | H | 2.835254000  | 6.787486000  | 3.633691000  |
| H  | -2.192522000 | 1.696770000  | 2.852590000  | C | 2.315777000  | 5.009219000  | 2.533652000  |
| H  | -2.973112000 | 0.170248000  | 3.317227000  | H | 1.634254000  | 4.642653000  | 3.294818000  |
| N  | -0.989487000 | 0.424781000  | 4.007557000  | C | -4.183186000 | 2.471966000  | -0.058010000 |
| N  | 0.990264000  | -0.427424000 | 4.007149000  | C | -4.778470000 | 2.184995000  | -1.302276000 |
| N  | 1.999621000  | 0.500725000  | 0.869682000  | H | -4.314337000 | 1.455767000  | -1.958363000 |
| N  | -0.527572000 | 2.007915000  | 0.920882000  | C | -5.942962000 | 2.847844000  | -1.704034000 |
| N  | -1.999472000 | -0.501745000 | 0.869728000  | H | -6.383336000 | 2.619061000  | -2.669532000 |
| N  | 0.527711000  | -2.008973000 | 0.919408000  | C | -6.534358000 | 3.805441000  | -0.871546000 |
| C  | 3.040212000  | -0.358983000 | 0.573516000  | H | -7.438259000 | 4.318459000  | -1.184828000 |
| C  | 2.517150000  | 1.769412000  | 1.055945000  | C | -5.952225000 | 4.098704000  | 0.367201000  |
| C  | 0.363536000  | 3.058578000  | 1.009770000  | H | -6.406341000 | 4.836887000  | 1.021228000  |
| C  | -1.760511000 | 2.513373000  | 0.539979000  | C | -4.786811000 | 3.437952000  | 0.769986000  |
| C  | -3.040127000 | 0.358153000  | 0.574267000  | H | -4.342843000 | 3.663560000  | 1.734601000  |
| C  | -2.516959000 | -1.770566000 | 1.055173000  | C | -2.509597000 | -4.249825000 | 1.362074000  |
| C  | -0.363364000 | -3.059704000 | 1.007836000  | C | -3.392289000 | -4.740929000 | 0.380552000  |
| C  | 1.760612000  | -2.514192000 | 0.538092000  | H | -3.533505000 | -4.176319000 | -0.535198000 |
| C  | 4.283703000  | 0.392512000  | 0.638221000  | C | -4.068599000 | -5.950995000 | 0.568490000  |
| H  | 5.266776000  | -0.020047000 | 0.475790000  | H | -4.740485000 | -6.316434000 | -0.201982000 |
| C  | 3.968247000  | 1.684183000  | 0.962345000  | C | -3.873751000 | -6.693502000 | 1.739181000  |
| H  | 4.651235000  | 2.506201000  | 1.103433000  | H | -4.399024000 | -7.632290000 | 1.884082000  |
| C  | -0.351361000 | 4.292162000  | 0.715291000  | C | -2.993417000 | -6.220340000 | 2.719170000  |
| H  | 0.090885000  | 5.275615000  | 0.700230000  | H | -2.835190000 | -6.790238000 | 3.629628000  |
| C  | -1.640128000 | 3.956285000  | 0.402441000  | C | -2.315639000 | -5.011295000 | 2.530712000  |
| H  | -2.432174000 | 4.619901000  | 0.094264000  | H | -1.634183000 | -4.645185000 | 3.292155000  |
| C  | -4.283590000 | -0.393413000 | 0.638619000  | C | -3.562303000 | -0.659463000 | -5.101012000 |
| H  | -5.266695000 | 0.019236000  | 0.476611000  | C | -2.420684000 | -1.366560000 | -4.705493000 |
| C  | -3.968067000 | -1.685313000 | 0.961759000  | C | -1.264025000 | -0.689331000 | -4.296968000 |
| H  | -4.651002000 | -2.507468000 | 1.102308000  | C | -1.249171000 | 0.720705000  | -4.294985000 |
| C  | 0.351535000  | -4.293116000 | 0.712596000  | C | -2.391791000 | 1.423176000  | -4.700715000 |
| H  | -0.090701000 | -5.276567000 | 0.697035000  | C | -3.548036000 | 0.740051000  | -5.098724000 |
| C  | 1.640243000  | -3.957038000 | 0.399766000  | C | -0.015790000 | -1.421552000 | -3.838509000 |
| H  | 2.432275000  | -4.620457000 | 0.091128000  | C | 0.014961000  | 1.425549000  | -3.837053000 |
| C  | 2.936941000  | -1.752806000 | 0.359449000  | C | 1.263216000  | 0.693783000  | -4.296230000 |
| C  | 1.765244000  | 2.959949000  | 1.176212000  | C | 1.248359000  | -0.716245000 | -4.295669000 |
| C  | -2.936887000 | 1.752110000  | 0.361067000  | C | 2.390977000  | -1.418315000 | -4.702096000 |
| C  | -1.765035000 | -2.961188000 | 1.174538000  | H | 2.373979000  | -2.505091000 | -4.709894000 |
| C  | 4.183178000  | -2.472393000 | -0.060285000 | C | 3.547225000  | -0.734796000 | -5.099414000 |
| C  | 4.778175000  | -2.184739000 | -1.304525000 | C | 3.561492000  | 0.664719000  | -5.100300000 |
| H  | 4.313845000  | -1.455189000 | -1.960118000 | C | 2.419874000  | 1.371423000  | -4.704071000 |
| C  | 5.942613000  | -2.847314000 | -1.706890000 | H | -0.017099000 | -1.445573000 | -2.736047000 |
| H  | 6.382781000  | -2.618004000 | -2.672357000 | H | -4.451523000 | -1.196877000 | -5.416933000 |
| C  | 6.534241000  | -3.805315000 | -0.875030000 | H | -2.426013000 | -2.453514000 | -4.714928000 |
| H  | 7.438104000  | -4.318117000 | -1.188777000 | H | -2.374808000 | 2.509959000  | -4.707411000 |

|   |              |              |              |
|---|--------------|--------------|--------------|
| H | -4.424690000 | 1.296652000  | -5.417236000 |
| H | 0.025776000  | 2.465118000  | -4.184485000 |
| H | 4.423879000  | -1.291079000 | -5.418476000 |
| H | 4.450703000  | 1.202458000  | -5.415693000 |
| H | 2.425222000  | 2.458385000  | -4.712395000 |
| H | -0.026543000 | -2.460786000 | -4.186984000 |
| H | 0.016247000  | 1.448443000  | -2.734562000 |

<sup>3</sup>RC<sub>(15)</sub>

|    |              |              |              |
|----|--------------|--------------|--------------|
| Fe | 0.000476000  | 0.000699000  | 0.801932000  |
| O  | -0.000116000 | -0.000596000 | -0.861547000 |
| C  | 0.001206000  | 0.002608000  | 3.085762000  |
| C  | -0.666298000 | 0.120807000  | 5.294734000  |
| H  | -1.364069000 | 0.238005000  | 6.105672000  |
| C  | 0.670501000  | -0.110949000 | 5.294439000  |
| H  | 1.368895000  | -0.226578000 | 6.105066000  |
| C  | 2.464587000  | -0.398987000 | 3.586770000  |
| H  | 2.990190000  | -0.794073000 | 4.459300000  |
| H  | 2.525421000  | -1.119209000 | 2.777166000  |
| H  | 2.934415000  | 0.535889000  | 3.276042000  |
| C  | -2.461767000 | 0.405141000  | 3.587842000  |
| H  | -2.987005000 | 0.800755000  | 4.460342000  |
| H  | -2.523366000 | 1.124610000  | 2.777606000  |
| H  | -2.931408000 | -0.530179000 | 3.278208000  |
| N  | -1.059532000 | 0.189510000  | 3.955019000  |
| N  | 1.062649000  | -0.182532000 | 3.954555000  |
| N  | 1.743804000  | 0.963274000  | 0.829665000  |
| N  | -0.973623000 | 1.741044000  | 0.858014000  |
| N  | -1.742860000 | -0.961799000 | 0.832431000  |
| N  | 0.974614000  | -1.739525000 | 0.860098000  |
| C  | 2.968637000  | 0.421753000  | 0.482396000  |
| C  | 1.952706000  | 2.300183000  | 1.125941000  |
| C  | -0.414872000 | 2.986626000  | 1.077634000  |
| C  | -2.282680000 | 1.945729000  | 0.441472000  |
| C  | -2.967935000 | -0.420786000 | 0.485160000  |
| C  | -1.951555000 | -2.298260000 | 1.130802000  |
| C  | 0.415984000  | -2.984783000 | 1.081814000  |
| C  | 2.283367000  | -1.944831000 | 0.442838000  |
| C  | 3.989647000  | 1.443705000  | 0.606411000  |
| H  | 5.039890000  | 1.292076000  | 0.414450000  |
| C  | 3.374421000  | 2.583608000  | 1.042897000  |
| H  | 3.832014000  | 3.534531000  | 1.262269000  |
| C  | -1.413989000 | 4.006984000  | 0.820587000  |
| H  | -1.245889000 | 5.068737000  | 0.904710000  |
| C  | -2.544637000 | 3.370833000  | 0.392253000  |
| H  | -3.471724000 | 3.818852000  | 0.073033000  |
| C  | -3.988849000 | -1.442585000 | 0.611345000  |
| H  | -5.039222000 | -1.291264000 | 0.419857000  |
| C  | -3.373323000 | -2.581830000 | 1.049111000  |
| H  | -3.830762000 | -3.532430000 | 1.270201000  |
| C  | 1.414882000  | -4.005530000 | 0.825444000  |
| H  | 1.246804000  | -5.067159000 | 0.911174000  |
| C  | 2.545236000  | -3.370009000 | 0.395414000  |
| H  | 3.472090000  | -3.818491000 | 0.076168000  |
| C  | 3.227091000  | -0.932576000 | 0.211562000  |
| C  | 0.943424000  | 3.256878000  | 1.320256000  |
| C  | -3.226588000 | 0.933115000  | 0.212453000  |
| C  | -0.942137000 | -3.254675000 | 1.325812000  |

|   |              |              |              |
|---|--------------|--------------|--------------|
| C | 4.595042000  | -1.301943000 | -0.272520000 |
| C | 5.024074000  | -0.873575000 | -1.543846000 |
| H | 4.348830000  | -0.298082000 | -2.168135000 |
| C | 6.299895000  | -1.204269000 | -2.012487000 |
| H | 6.608657000  | -0.873448000 | -2.999090000 |
| C | 7.169373000  | -1.963004000 | -1.220121000 |
| H | 8.159280000  | -2.218332000 | -1.585296000 |
| C | 6.754908000  | -2.391370000 | 0.046509000  |
| H | 7.424913000  | -2.975360000 | 0.670193000  |
| C | 5.478549000  | -2.063580000 | 0.516232000  |
| H | 5.164795000  | -2.390265000 | 1.502847000  |
| C | 1.322054000  | 4.666648000  | 1.655717000  |
| C | 2.070062000  | 5.463374000  | 0.767184000  |
| H | 2.375557000  | 5.048826000  | -0.187852000 |
| C | 2.402090000  | 6.781948000  | 1.095936000  |
| H | 2.974342000  | 7.382608000  | 0.395708000  |
| C | 1.990352000  | 7.329572000  | 2.316689000  |
| H | 2.248369000  | 8.352848000  | 2.570718000  |
| C | 1.239089000  | 6.551246000  | 3.204963000  |
| H | 0.913887000  | 6.968427000  | 4.153083000  |
| C | 0.905907000  | 5.233172000  | 2.876050000  |
| H | 0.324659000  | 4.630200000  | 3.566565000  |
| C | -4.594897000 | 1.301763000  | -0.271165000 |
| C | -5.024916000 | 0.871421000  | -1.541487000 |
| H | -4.350182000 | 0.294918000  | -2.165389000 |
| C | -6.301082000 | 1.201424000  | -2.009677000 |
| H | -6.610590000 | 0.869058000  | -2.995527000 |
| C | -7.169931000 | 1.961431000  | -1.217845000 |
| H | -8.160105000 | 2.216230000  | -1.582668000 |
| C | -6.754484000 | 2.391771000  | 0.047795000  |
| H | -7.423993000 | 2.976761000  | 0.671075000  |
| C | -5.477778000 | 2.064677000  | 0.517060000  |
| H | -5.163270000 | 2.392897000  | 1.502924000  |
| C | -1.320548000 | -4.663961000 | 1.663538000  |
| C | -2.069239000 | -5.461911000 | 0.776676000  |
| H | -2.375429000 | -5.048688000 | -0.178712000 |
| C | -2.401068000 | -6.780009000 | 1.107522000  |
| H | -2.973858000 | -7.381631000 | 0.408561000  |
| C | -1.988448000 | -7.325932000 | 2.328741000  |
| H | -2.246312000 | -8.348841000 | 2.584400000  |
| C | -1.236515000 | -6.546381000 | 3.215371000  |
| H | -0.910630000 | -6.962240000 | 4.163837000  |
| C | -0.903534000 | -5.228779000 | 2.884363000  |
| H | -0.321758000 | -4.624861000 | 3.573606000  |
| C | -3.550362000 | -0.674267000 | -5.219434000 |
| C | -2.413537000 | -1.379173000 | -4.803798000 |
| C | -1.263156000 | -0.698565000 | -4.384391000 |
| C | -1.250424000 | 0.711986000  | -4.387600000 |
| C | -2.387289000 | 1.411397000  | -4.812389000 |

|   |              |              |              |
|---|--------------|--------------|--------------|
| C | -3.536730000 | 0.725369000  | -5.224657000 |
| C | -0.014209000 | -1.423295000 | -3.914965000 |
| C | 0.009950000  | 1.415949000  | -3.916969000 |
| C | 1.258605000  | 0.690561000  | -4.386135000 |
| C | 1.245878000  | -0.719992000 | -4.387343000 |
| C | 2.382489000  | -1.420001000 | -4.811830000 |
| H | 2.367607000  | -2.506709000 | -4.819569000 |
| C | 3.531687000  | -0.734555000 | -5.225731000 |
| C | 3.545323000  | 0.665087000  | -5.222480000 |
| C | 2.408740000  | 1.370577000  | -4.807174000 |
| H | -0.012431000 | -1.427817000 | -2.812339000 |
| H | -4.433557000 | -1.214353000 | -5.547860000 |
| H | -2.417855000 | -2.466127000 | -4.808715000 |
| H | -2.372410000 | 2.498092000  | -4.821665000 |
| H | -4.409298000 | 1.280260000  | -5.556584000 |
| H | 0.018913000  | 2.459732000  | -4.251182000 |
| H | 4.404071000  | -1.289908000 | -5.557368000 |
| H | 4.428323000  | 1.204709000  | -5.552189000 |
| H | 2.413053000  | 2.457523000  | -4.813606000 |
| H | -0.023380000 | -2.467543000 | -4.247718000 |
| H | 0.008866000  | 1.421980000  | -2.814351000 |

<sup>1</sup>RC<sub>(LS)</sub>

|    |              |              |              |   |              |              |              |
|----|--------------|--------------|--------------|---|--------------|--------------|--------------|
| Fe | 0.774252000  | -0.048337000 | 0.156863000  | C | -2.541057000 | -2.551214000 | 0.749591000  |
| O  | 0.489342000  | -0.015019000 | -1.504929000 | H | -3.109813000 | -3.430289000 | 0.500636000  |
| C  | 1.420501000  | -0.043581000 | 2.201037000  | C | 2.095937000  | -4.031917000 | -0.435472000 |
| C  | 1.995673000  | -0.720126000 | 4.325671000  | H | 1.883983000  | -5.079489000 | -0.581237000 |
| H  | 2.155650000  | -1.428847000 | 5.119902000  | C | 3.312465000  | -3.433405000 | -0.250506000 |
| C  | 2.147633000  | 0.628583000  | 4.279710000  | H | 4.282625000  | -3.902671000 | -0.231895000 |
| H  | 2.460931000  | 1.336454000  | 5.027641000  | C | 4.655879000  | 1.336904000  | -0.849766000 |
| C  | 1.812833000  | 2.437270000  | 2.597193000  | H | 5.702100000  | 1.149858000  | -1.033371000 |
| H  | 2.358400000  | 2.993047000  | 3.365003000  | C | 3.931457000  | 2.456114000  | -1.157785000 |
| H  | 2.318497000  | 2.547033000  | 1.643665000  | H | 4.280883000  | 3.359296000  | -1.631236000 |
| H  | 0.797058000  | 2.828125000  | 2.517093000  | C | 1.517646000  | 3.145198000  | -0.731007000 |
| C  | 1.281155000  | -2.521943000 | 2.758849000  | C | -2.115047000 | 0.912886000  | 1.648251000  |
| H  | 1.198969000  | -3.060693000 | 3.707163000  | C | -0.295221000 | -3.233746000 | -0.222693000 |
| H  | 0.345093000  | -2.603632000 | 2.215991000  | C | 4.042643000  | -0.998092000 | -0.117607000 |
| H  | 2.086700000  | -2.953874000 | 2.162244000  | C | 1.727618000  | 4.495334000  | -1.320568000 |
| N  | 1.552124000  | -1.114062000 | 3.061571000  | C | 0.836173000  | 4.961064000  | -2.306789000 |
| N  | 1.795929000  | 1.025276000  | 2.987765000  | H | 0.029393000  | 4.311626000  | -2.625916000 |
| N  | -0.137508000 | 1.688368000  | 0.402660000  | C | 0.994770000  | 6.230760000  | -2.870787000 |
| N  | -0.830586000 | -1.002633000 | 0.710117000  | H | 0.303557000  | 6.570658000  | -3.636039000 |
| N  | 1.703501000  | -1.787525000 | -0.108512000 | C | 2.045503000  | 7.059371000  | -2.454665000 |
| N  | 2.479496000  | 0.931329000  | -0.222320000 | H | 2.169407000  | 8.045273000  | -2.891747000 |
| C  | 0.288556000  | 2.900356000  | -0.096550000 | C | 2.934158000  | 6.609438000  | -1.469363000 |
| C  | -1.288926000 | 1.922149000  | 1.127526000  | H | 3.744438000  | 7.249962000  | -1.134495000 |
| C  | -1.933459000 | -0.445379000 | 1.335628000  | C | 2.775759000  | 5.338707000  | -0.905607000 |
| C  | -1.174073000 | -2.304667000 | 0.349848000  | H | 3.454882000  | 4.996706000  | -0.131783000 |
| C  | 1.088899000  | -2.993002000 | -0.327079000 | C | -3.316565000 | 1.272073000  | 2.450971000  |
| C  | 3.068275000  | -2.007718000 | -0.108911000 | C | -4.290871000 | 2.169920000  | 1.972636000  |
| C  | 3.731185000  | 0.363345000  | -0.301984000 | H | -4.167955000 | 2.607243000  | 0.989222000  |
| C  | 2.567136000  | 2.213490000  | -0.736925000 | C | -5.422037000 | 2.467742000  | 2.740156000  |
| C  | -0.614443000 | 3.941597000  | 0.352995000  | H | -6.167053000 | 3.155618000  | 2.351587000  |
| H  | -0.507710000 | 4.988494000  | 0.117932000  | C | -5.602660000 | 1.872456000  | 3.995318000  |
| C  | -1.556059000 | 3.348158000  | 1.145852000  | H | -6.481616000 | 2.104068000  | 4.588943000  |
| H  | -2.370282000 | 3.823023000  | 1.667269000  | C | -4.644522000 | 0.970610000  | 4.477182000  |
| C  | -2.986089000 | -1.435350000 | 1.399056000  | H | -4.777114000 | 0.502649000  | 5.447956000  |
| H  | -3.969530000 | -1.255167000 | 1.801618000  | C | -3.513474000 | 0.671842000  | 3.710726000  |

|   |              |              |              |
|---|--------------|--------------|--------------|
| H | -2.769979000 | -0.027888000 | 4.078632000  |
| C | -0.795372000 | -4.558364000 | -0.675142000 |
| C | -0.501144000 | -4.982032000 | -1.987401000 |
| H | 0.084494000  | -4.329464000 | -2.626220000 |
| C | -0.972851000 | -6.207181000 | -2.467481000 |
| H | -0.744863000 | -6.511094000 | -3.484476000 |
| C | -1.744930000 | -7.036057000 | -1.641834000 |
| H | -2.116470000 | -7.985486000 | -2.014527000 |
| C | -2.026502000 | -6.635273000 | -0.329472000 |
| H | -2.608966000 | -7.279281000 | 0.322299000  |
| C | -1.550305000 | -5.411126000 | 0.151627000  |
| H | -1.754887000 | -5.113245000 | 1.173819000  |
| C | 5.487079000  | -1.362976000 | -0.095829000 |
| C | 6.052311000  | -2.229934000 | -1.050985000 |
| H | 5.418774000  | -2.642283000 | -1.828495000 |
| C | 7.416483000  | -2.538210000 | -1.015266000 |
| H | 7.837314000  | -3.203118000 | -1.763297000 |
| C | 8.240375000  | -1.980778000 | -0.028618000 |
| H | 9.298830000  | -2.220377000 | -0.002229000 |
| C | 7.692108000  | -1.105630000 | 0.918319000  |
| H | 8.324596000  | -0.665661000 | 1.683348000  |
| C | 6.328444000  | -0.796735000 | 0.881964000  |
| H | 5.899017000  | -0.116939000 | 1.611012000  |
| C | -3.676143000 | -3.581665000 | -2.353944000 |
| C | -2.850835000 | -2.470328000 | -2.534867000 |
| C | -3.252632000 | -1.187914000 | -2.124505000 |
| C | -4.516795000 | -1.024120000 | -1.531482000 |
| C | -5.352871000 | -2.140871000 | -1.369353000 |
| C | -4.940504000 | -3.414837000 | -1.769737000 |
| C | -2.297284000 | -0.030393000 | -2.284928000 |
| C | -4.960814000 | 0.324376000  | -1.003839000 |
| C | -4.190661000 | 1.506285000  | -1.554828000 |
| C | -2.909856000 | 1.338855000  | -2.111132000 |
| C | -2.185012000 | 2.472024000  | -2.520387000 |
| H | -1.182212000 | 2.326398000  | -2.912026000 |
| C | -2.727217000 | 3.753013000  | -2.404432000 |
| C | -4.017267000 | 3.918967000  | -1.880926000 |
| C | -4.737900000 | 2.798167000  | -1.460804000 |
| H | -1.454588000 | -0.140515000 | -1.577329000 |
| H | -3.331026000 | -4.566841000 | -2.650016000 |
| H | -1.864559000 | -2.592707000 | -2.972496000 |
| H | -6.331261000 | -2.003587000 | -0.914467000 |
| H | -5.596533000 | -4.269234000 | -1.630501000 |
| H | -6.035695000 | 0.461292000  | -1.188782000 |
| H | -2.152574000 | 4.619913000  | -2.715646000 |
| H | -4.453941000 | 4.910125000  | -1.801504000 |
| H | -5.738187000 | 2.915943000  | -1.049998000 |
| H | -1.812286000 | -0.088030000 | -3.268182000 |
| H | -4.846005000 | 0.324320000  | 0.093868000  |

<sup>5</sup>TS1<sub>(HS)</sub>

|    |              |              |              |
|----|--------------|--------------|--------------|
| Fe | -0.683817000 | -0.065614000 | 0.306243000  |
| O  | -0.384198000 | 0.085803000  | -1.416566000 |
| C  | -1.172158000 | -0.171795000 | 2.392357000  |
| C  | -1.767878000 | 0.391539000  | 4.541973000  |
| H  | -2.059816000 | 1.057148000  | 5.335728000  |
| C  | -1.558542000 | -0.949026000 | 4.522824000  |
| H  | -1.625211000 | -1.693052000 | 5.297598000  |

|   |              |              |             |
|---|--------------|--------------|-------------|
| C | -0.889236000 | -2.660620000 | 2.843937000 |
| H | -1.231013000 | -3.310237000 | 3.654563000 |
| H | -1.414728000 | -2.917126000 | 1.930080000 |
| H | 0.184191000  | -2.792277000 | 2.700345000 |
| C | -1.675893000 | 2.270002000  | 2.911631000 |
| H | -1.726060000 | 2.831478000  | 3.848764000 |
| H | -0.814175000 | 2.598481000  | 2.340284000 |

|   |              |              |              |   |              |              |              |
|---|--------------|--------------|--------------|---|--------------|--------------|--------------|
| H | -2.585521000 | 2.441028000  | 2.333753000  | C | -0.869596000 | 5.242413000  | -1.652578000 |
| N | -1.529834000 | 0.850990000  | 3.244796000  | H | -1.268023000 | 4.511684000  | -2.347843000 |
| N | -1.199189000 | -1.277898000 | 3.214068000  | C | -0.802005000 | 6.593996000  | -2.003902000 |
| N | 0.712236000  | -1.539920000 | 0.505594000  | H | -1.156495000 | 6.915826000  | -2.978450000 |
| N | 0.734263000  | 1.369893000  | 0.771399000  | C | -0.272232000 | 7.529478000  | -1.104812000 |
| N | -2.063867000 | 1.418316000  | 0.041754000  | H | -0.217463000 | 8.578890000  | -1.377255000 |
| N | -2.135207000 | -1.521165000 | -0.039798000 | C | 0.181933000  | 7.102420000  | 0.149627000  |
| C | 0.553169000  | -2.859114000 | 0.131993000  | H | 0.582927000  | 7.822250000  | 0.856799000  |
| C | 1.942143000  | -1.403018000 | 1.123274000  | C | 0.110365000  | 5.750181000  | 0.501561000  |
| C | 2.002363000  | 1.102975000  | 1.229340000  | H | 0.450471000  | 5.422110000  | 1.477903000  |
| C | 0.672232000  | 2.699968000  | 0.401178000  | C | -5.588251000 | 0.008173000  | -0.232928000 |
| C | -1.774601000 | 2.752646000  | -0.135184000 | C | -6.253773000 | 0.721167000  | -1.249156000 |
| C | -3.431222000 | 1.248472000  | -0.028793000 | H | -5.667412000 | 1.285435000  | -1.965967000 |
| C | -3.468411000 | -1.252643000 | -0.244658000 | C | -7.648720000 | 0.686796000  | -1.349653000 |
| C | -1.876198000 | -2.803195000 | -0.481291000 | H | -8.144568000 | 1.236887000  | -2.143634000 |
| C | 1.724795000  | -3.599435000 | 0.567418000  | C | -8.403395000 | -0.065783000 | -0.440096000 |
| H | 1.872149000  | -4.658303000 | 0.428152000  | H | -9.485764000 | -0.092644000 | -0.519472000 |
| C | 2.556600000  | -2.719019000 | 1.203686000  | C | -7.752327000 | -0.789985000 | 0.567208000  |
| H | 3.503254000  | -2.938996000 | 1.668475000  | H | -8.329210000 | -1.379120000 | 1.273683000  |
| C | 2.777432000  | 2.333524000  | 1.178924000  | C | -6.357547000 | -0.755580000 | 0.666901000  |
| H | 3.817743000  | 2.417478000  | 1.450804000  | H | -5.848507000 | -1.318345000 | 1.442751000  |
| C | 1.974814000  | 3.299918000  | 0.636950000  | C | 1.854853000  | 3.792129000  | -3.073846000 |
| H | 2.250125000  | 4.307303000  | 0.374358000  | C | 1.425853000  | 2.465702000  | -3.105375000 |
| C | -3.030097000 | 3.478465000  | -0.251216000 | C | 2.251847000  | 1.424437000  | -2.633959000 |
| H | -3.116284000 | 4.547927000  | -0.361755000 | C | 3.519142000  | 1.743022000  | -2.098599000 |
| C | -4.044327000 | 2.563770000  | -0.152433000 | C | 3.947622000  | 3.077438000  | -2.088793000 |
| H | -5.104745000 | 2.756517000  | -0.176875000 | C | 3.127977000  | 4.101543000  | -2.570997000 |
| C | -4.097066000 | -2.437427000 | -0.811748000 | C | 1.779513000  | 0.022507000  | -2.696037000 |
| H | -5.136367000 | -2.509077000 | -1.091868000 | C | 4.393727000  | 0.665006000  | -1.496143000 |
| C | -3.116511000 | -3.376814000 | -0.982010000 | C | 4.054229000  | -0.742543000 | -1.935620000 |
| H | -3.214813000 | -4.355195000 | -1.424807000 | C | 2.780684000  | -1.041573000 | -2.473112000 |
| C | -0.620549000 | -3.445365000 | -0.398191000 | C | 2.494695000  | -2.371288000 | -2.844958000 |
| C | 2.531845000  | -0.179641000 | 1.515069000  | H | 1.514470000  | -2.594292000 | -3.257182000 |
| C | -0.495381000 | 3.353224000  | -0.046966000 | C | 3.442675000  | -3.383371000 | -2.694802000 |
| C | -4.100203000 | 0.007324000  | -0.117202000 | C | 4.709280000  | -3.081876000 | -2.174075000 |
| C | -0.537145000 | -4.876369000 | -0.806832000 | C | 5.006044000  | -1.765570000 | -1.807358000 |
| C | 0.449665000  | -5.295819000 | -1.720260000 | H | 0.791330000  | -0.042465000 | -1.861149000 |
| H | 1.134103000  | -4.557460000 | -2.117650000 | H | 1.203686000  | 4.583803000  | -3.427297000 |
| C | 0.548469000  | -6.637174000 | -2.102249000 | H | 0.439535000  | 2.212552000  | -3.482104000 |
| H | 1.312129000  | -6.940036000 | -2.812546000 | H | 4.930962000  | 3.310953000  | -1.687581000 |
| C | -0.337024000 | -7.587197000 | -1.576107000 | H | 3.472071000  | 5.131276000  | -2.552000000 |
| H | -0.261479000 | -8.628661000 | -1.872991000 | H | 5.450951000  | 0.875869000  | -1.709832000 |
| C | -1.318867000 | -7.184479000 | -0.661286000 | H | 3.204499000  | -4.400882000 | -2.990099000 |
| H | -2.002513000 | -7.915485000 | -0.240201000 | H | 5.458645000  | -3.860328000 | -2.068466000 |
| C | -1.416539000 | -5.842571000 | -0.278689000 | H | 5.992783000  | -1.517841000 | -1.423030000 |
| H | -2.170077000 | -5.533275000 | 0.437818000  | H | 1.150612000  | -0.172060000 | -3.572332000 |
| C | 3.864305000  | -0.202157000 | 2.185217000  | H | 4.296380000  | 0.719032000  | -0.400025000 |
| C | 4.971453000  | -0.873870000 | 1.629954000  |   |              |              |              |
| H | 4.852704000  | -1.393353000 | 0.687097000  |   |              |              |              |
| C | 6.214806000  | -0.852967000 | 2.270517000  |   |              |              |              |
| H | 7.057655000  | -1.371065000 | 1.822622000  |   |              |              |              |
| C | 6.378274000  | -0.157930000 | 3.475759000  |   |              |              |              |
| H | 7.344038000  | -0.141889000 | 3.971338000  |   |              |              |              |
| C | 5.287250000  | 0.521005000  | 4.034517000  |   |              |              |              |
| H | 5.403660000  | 1.063559000  | 4.967828000  |   |              |              |              |
| C | 4.044199000  | 0.500349000  | 3.394162000  |   |              |              |              |
| H | 3.197939000  | 1.027360000  | 3.822403000  |   |              |              |              |
| C | -0.409353000 | 4.798403000  | -0.396600000 |   |              |              |              |

<sup>3</sup>TS1<sub>(IS)</sub>

|    |              |              |              |   |              |              |              |
|----|--------------|--------------|--------------|---|--------------|--------------|--------------|
| Fe | -0.702839000 | -0.004018000 | 0.195515000  | C | -1.990582000 | -6.946514000 | -0.972722000 |
| O  | -0.335471000 | 0.089008000  | -1.531411000 | H | -2.707758000 | -7.634974000 | -0.535990000 |
| C  | -1.240331000 | -0.076680000 | 2.256193000  | C | -1.958903000 | -5.614543000 | -0.546041000 |
| C  | -1.771046000 | 0.527298000  | 4.413766000  | H | -2.645400000 | -5.270914000 | 0.220603000  |
| H  | -1.978143000 | 1.213051000  | 5.217168000  | C | 3.603636000  | -0.659678000 | 2.409697000  |
| C  | -1.742612000 | -0.829047000 | 4.373591000  | C | 4.692846000  | -1.425418000 | 1.948416000  |
| H  | -1.912717000 | -1.569338000 | 5.136209000  | H | 4.626097000  | -1.907476000 | 0.980457000  |
| C  | -1.289512000 | -2.584990000 | 2.661971000  | C | 5.858024000  | -1.541461000 | 2.713844000  |
| H  | -1.751842000 | -3.201503000 | 3.438106000  | H | 6.689594000  | -2.130814000 | 2.339046000  |
| H  | -1.803533000 | -2.744882000 | 1.719888000  | C | 5.960084000  | -0.891924000 | 3.950826000  |
| H  | -0.238527000 | -2.860077000 | 2.555472000  | H | 6.865335000  | -0.982777000 | 4.543094000  |
| C  | -1.428581000 | 2.399851000  | 2.803623000  | C | 4.887756000  | -0.118912000 | 4.415571000  |
| H  | -1.409306000 | 2.956221000  | 3.745001000  | H | 4.957932000  | 0.390324000  | 5.371994000  |
| H  | -0.532577000 | 2.623742000  | 2.233854000  | C | 3.722404000  | -0.002998000 | 3.651243000  |
| H  | -2.309076000 | 2.689364000  | 2.227018000  | H | 2.889997000  | 0.595317000  | 4.007127000  |
| N  | -1.464401000 | 0.970762000  | 3.124480000  | C | 0.138212000  | 4.722102000  | -0.606164000 |
| N  | -1.422676000 | -1.181759000 | 3.059899000  | C | -0.250227000 | 5.155455000  | -1.890007000 |
| N  | 0.483337000  | -1.571649000 | 0.421054000  | H | -0.714394000 | 4.440919000  | -2.561233000 |
| N  | 0.801115000  | 1.190876000  | 0.665347000  | C | -0.025685000 | 6.472870000  | -2.300187000 |
| N  | -1.882384000 | 1.570594000  | -0.058067000 | H | -0.325432000 | 6.785952000  | -3.295713000 |
| N  | -2.233763000 | -1.205780000 | -0.211641000 | C | 0.590719000  | 7.384699000  | -1.432431000 |
| C  | 0.225103000  | -2.848492000 | -0.039864000 | H | 0.769139000  | 8.407026000  | -1.750963000 |
| C  | 1.675484000  | -1.617609000 | 1.121490000  | C | 0.967787000  | 6.970546000  | -0.148588000 |
| C  | 1.981061000  | 0.821064000  | 1.275236000  | H | 1.430897000  | 7.674821000  | 0.535866000  |
| C  | 0.923624000  | 2.523545000  | 0.299096000  | C | 0.737907000  | 5.653059000  | 0.262729000  |
| C  | -1.452026000 | 2.861145000  | -0.273789000 | H | 1.013276000  | 5.340188000  | 1.263888000  |
| C  | -3.264321000 | 1.589191000  | -0.049897000 | C | -5.561929000 | 0.594760000  | -0.076663000 |
| C  | -3.561580000 | -0.843688000 | -0.287437000 | C | -6.237395000 | 1.380905000  | -1.030275000 |
| C  | -2.134451000 | -2.505195000 | -0.678907000 | H | -5.661774000 | 1.891944000  | -1.794109000 |
| C  | 1.282768000  | -3.732333000 | 0.405425000  | C | -7.632491000 | 1.483851000  | -1.011372000 |
| H  | 1.330293000  | -4.787833000 | 0.191740000  | H | -8.137339000 | 2.088980000  | -1.758219000 |
| C  | 2.148213000  | -2.987939000 | 1.156407000  | C | -8.377589000 | 0.797258000  | -0.043707000 |
| H  | 3.035507000  | -3.328096000 | 1.663251000  | H | -9.460192000 | 0.876666000  | -0.030774000 |
| C  | 2.871889000  | 1.963209000  | 1.314621000  | C | -7.717976000 | 0.000869000  | 0.901657000  |
| H  | 3.875904000  | 1.944103000  | 1.707360000  | H | -8.288295000 | -0.537978000 | 1.652207000  |
| C  | 2.243482000  | 2.990315000  | 0.670136000  | C | -6.323078000 | -0.101544000 | 0.882719000  |
| H  | 2.648873000  | 3.957230000  | 0.427303000  | H | -5.807670000 | -0.719887000 | 1.610698000  |
| C  | -2.605356000 | 3.737291000  | -0.352336000 | C | 2.639776000  | 3.710196000  | -2.830477000 |
| H  | -2.556262000 | 4.806194000  | -0.487200000 | C | 2.010394000  | 2.468998000  | -2.921548000 |
| C  | -3.717688000 | 2.962481000  | -0.168207000 | C | 2.631647000  | 1.300271000  | -2.436014000 |
| H  | -4.746867000 | 3.281631000  | -0.139063000 | C | 3.899130000  | 1.405839000  | -1.822164000 |
| C  | -4.332096000 | -1.957051000 | -0.807839000 | C | 4.533390000  | 2.654079000  | -1.755177000 |
| H  | -5.395300000 | -1.934878000 | -0.987344000 | C | 3.915701000  | 3.804144000  | -2.254265000 |
| C  | -3.449933000 | -2.963150000 | -1.084865000 | C | 1.959341000  | -0.011946000 | -2.586775000 |
| H  | -3.660223000 | -3.923618000 | -1.526871000 | C | 4.553025000  | 0.195494000  | -1.193585000 |
| C  | -0.970493000 | -3.288032000 | -0.633932000 | C | 4.038332000  | -1.132624000 | -1.702881000 |
| C  | 2.357230000  | -0.492278000 | 1.612033000  | C | 2.778444000  | -1.219969000 | -2.339156000 |
| C  | -0.120180000 | 3.311838000  | -0.208525000 | C | 2.330212000  | -2.480420000 | -2.783214000 |
| C  | -4.079324000 | 0.447705000  | -0.086880000 | H | 1.361340000  | -2.539729000 | -3.271156000 |
| C  | -1.033969000 | -4.704783000 | -1.094465000 | C | 3.105168000  | -3.627051000 | -2.608807000 |
| C  | -0.135286000 | -5.168466000 | -2.073043000 | C | 4.357978000  | -3.535467000 | -1.986484000 |
| H  | 0.581409000  | -4.473349000 | -2.489389000 | C | 4.815302000  | -2.290314000 | -1.545177000 |
| C  | -0.165367000 | -6.500036000 | -2.499781000 | H | 0.885364000  | -0.003842000 | -1.861126000 |
| H  | 0.531881000  | -6.837705000 | -3.260785000 | H | 2.140468000  | 4.600545000  | -3.195645000 |
| C  | -1.094487000 | -7.394333000 | -1.952342000 | H | 1.020585000  | 2.384277000  | -3.360347000 |
| H  | -1.118895000 | -8.428041000 | -2.282980000 | H | 5.516799000  | 2.719700000  | -1.295609000 |

|   |             |              |              |
|---|-------------|--------------|--------------|
| H | 4.418046000 | 4.764946000  | -2.192690000 |
| H | 5.643007000 | 0.246336000  | -1.324680000 |
| H | 2.742794000 | -4.588673000 | -2.959168000 |
| H | 4.973609000 | -4.420570000 | -1.858631000 |
| H | 5.795759000 | -2.203790000 | -1.082345000 |
| H | 1.395066000 | -0.082111000 | -3.524392000 |
| H | 4.382091000 | 0.241853000  | -0.106330000 |

<sup>1</sup>TS1<sub>(LS)</sub>

|    |              |              |              |   |              |              |              |
|----|--------------|--------------|--------------|---|--------------|--------------|--------------|
| Fe | -0.665413000 | 0.016091000  | 0.234210000  | C | -1.296111000 | -4.674774000 | -1.047182000 |
| O  | -0.382413000 | 0.014277000  | -1.495053000 | C | -0.408391000 | -5.188528000 | -2.010543000 |
| C  | -1.306150000 | -0.006516000 | 2.244579000  | H | 0.357705000  | -4.535056000 | -2.406425000 |
| C  | -1.920748000 | 0.647683000  | 4.367923000  | C | -0.512713000 | -6.513153000 | -2.446552000 |
| H  | -2.132900000 | 1.351422000  | 5.154306000  | H | 0.177621000  | -6.890345000 | -3.195318000 |
| C  | -1.961486000 | -0.708930000 | 4.340062000  | C | -1.507381000 | -7.350102000 | -1.923953000 |
| H  | -2.209862000 | -1.430525000 | 5.099159000  | H | -1.589943000 | -8.378458000 | -2.261881000 |
| C  | -1.488192000 | -2.506532000 | 2.684783000  | C | -2.393834000 | -6.852016000 | -0.959858000 |
| H  | -1.974658000 | -3.093026000 | 3.469401000  | H | -3.161669000 | -7.496483000 | -0.542536000 |
| H  | -1.993777000 | -2.676546000 | 1.740407000  | C | -2.287773000 | -5.526980000 | -0.523660000 |
| H  | -0.443519000 | -2.809763000 | 2.598169000  | H | -2.967019000 | -5.144699000 | 0.230944000  |
| C  | -1.366302000 | 2.481941000  | 2.779743000  | C | 3.595582000  | -0.909135000 | 2.399105000  |
| H  | -1.327481000 | 3.034699000  | 3.722900000  | C | 4.626907000  | -1.720275000 | 1.885020000  |
| H  | -0.440282000 | 2.633661000  | 2.235191000  | H | 4.498825000  | -2.180546000 | 0.912166000  |
| H  | -2.205561000 | 2.840845000  | 2.181378000  | C | 5.809806000  | -1.913383000 | 2.606560000  |
| N  | -1.520037000 | 1.060170000  | 3.095993000  | H | 6.595916000  | -2.537708000 | 2.192273000  |
| N  | -1.587921000 | -1.092264000 | 3.050640000  | C | 5.987028000  | -1.296495000 | 3.851758000  |
| N  | 0.392080000  | -1.633151000 | 0.475528000  | H | 6.905639000  | -1.446627000 | 4.410478000  |
| N  | 0.874021000  | 1.119752000  | 0.708707000  | C | 4.972622000  | -0.479862000 | 4.369153000  |
| N  | -1.745248000 | 1.672867000  | -0.070528000 | H | 5.101718000  | 0.003508000  | 5.332849000  |
| N  | -2.280021000 | -1.110552000 | -0.184155000 | C | 3.789651000  | -0.287021000 | 3.648483000  |
| C  | 0.060080000  | -2.896334000 | 0.020864000  | H | 3.002375000  | 0.346126000  | 4.044530000  |
| C  | 1.583820000  | -1.747565000 | 1.166399000  | C | 0.456192000  | 4.702905000  | -0.546728000 |
| C  | 2.034000000  | 0.673034000  | 1.316933000  | C | 0.096972000  | 5.188320000  | -1.820657000 |
| C  | 1.083061000  | 2.450510000  | 0.354371000  | H | -0.407349000 | 4.518348000  | -2.508485000 |
| C  | -1.247732000 | 2.934440000  | -0.280601000 | C | 0.397211000  | 6.499586000  | -2.200353000 |
| C  | -3.124936000 | 1.765686000  | -0.088061000 | H | 0.117029000  | 6.852157000  | -3.188401000 |
| C  | -3.575877000 | -0.655061000 | -0.288202000 | C | 1.063905000  | 7.354508000  | -1.311946000 |
| C  | -2.265390000 | -2.413125000 | -0.643028000 | H | 1.301398000  | 8.371922000  | -1.606790000 |
| C  | 1.064645000  | -3.840546000 | 0.468865000  | C | 1.413088000  | 6.889865000  | -0.037709000 |
| H  | 1.044723000  | -4.899344000 | 0.266546000  | H | 1.913709000  | 7.550409000  | 0.663744000  |
| C  | 1.976742000  | -3.144112000 | 1.209509000  | C | 1.105410000  | 5.579147000  | 0.343579000  |
| H  | 2.844630000  | -3.531650000 | 1.716641000  | H | 1.356419000  | 5.230388000  | 1.339135000  |
| C  | 2.992333000  | 1.757849000  | 1.362353000  | C | -5.476346000 | 0.913871000  | -0.128570000 |
| H  | 3.993747000  | 1.673656000  | 1.753319000  | C | -6.092076000 | 1.716049000  | -1.108618000 |
| C  | 2.429395000  | 2.826921000  | 0.726378000  | H | -5.477842000 | 2.171973000  | -1.877270000 |
| H  | 2.896047000  | 3.766800000  | 0.487139000  | C | -7.478140000 | 1.906102000  | -1.107427000 |
| C  | -2.348645000 | 3.874805000  | -0.387984000 | H | -7.937282000 | 2.522322000  | -1.874448000 |
| H  | -2.239760000 | 4.939274000  | -0.521794000 | C | -8.273437000 | 1.293118000  | -0.130333000 |
| C  | -3.503734000 | 3.161648000  | -0.224533000 | H | -9.348982000 | 1.440586000  | -0.130679000 |
| H  | -4.514626000 | 3.535896000  | -0.217491000 | C | -7.673664000 | 0.481930000  | 0.841985000  |
| C  | -4.415906000 | -1.716527000 | -0.813326000 | H | -8.283378000 | -0.000443000 | 1.599970000  |
| H  | -5.471219000 | -1.620162000 | -1.013876000 | C | -6.287906000 | 0.291264000  | 0.839854000  |
| C  | -3.602169000 | -2.784020000 | -1.068684000 | H | -5.818523000 | -0.340056000 | 1.587559000  |
| H  | -3.871548000 | -3.730535000 | -1.508655000 | C | 2.852532000  | 3.645535000  | -2.797042000 |
| C  | -1.152412000 | -3.266506000 | -0.581801000 | C | 2.125848000  | 2.459123000  | -2.891770000 |
| C  | 2.337366000  | -0.661801000 | 1.640420000  | C | 2.655259000  | 1.243067000  | -2.417578000 |
| C  | 0.107417000  | 3.304805000  | -0.176455000 | C | 3.930936000  | 1.241093000  | -1.814326000 |
| C  | -4.005215000 | 0.673468000  | -0.118567000 | C | 4.661761000  | 2.435656000  | -1.739470000 |

|   |             |              |              |
|---|-------------|--------------|--------------|
| C | 4.133964000 | 3.633695000  | -2.225840000 |
| C | 1.881179000 | -0.017169000 | -2.585469000 |
| C | 4.502738000 | -0.026191000 | -1.221709000 |
| C | 3.900426000 | -1.299538000 | -1.770166000 |
| C | 2.633550000 | -1.288759000 | -2.393131000 |
| C | 2.102196000 | -2.498894000 | -2.879925000 |
| H | 1.122126000 | -2.483536000 | -3.347818000 |
| C | 2.812950000 | -3.694228000 | -2.764904000 |
| C | 4.074279000 | -3.701609000 | -2.153059000 |
| C | 4.608613000 | -2.506996000 | -1.664817000 |
| H | 0.898149000 | -0.011829000 | -1.862747000 |
| H | 2.424328000 | 4.574773000  | -3.154334000 |
| H | 1.130315000 | 2.457242000  | -3.325544000 |
| H | 5.650373000 | 2.418926000  | -1.287225000 |
| H | 4.710681000 | 4.551360000  | -2.160022000 |
| H | 5.592918000 | -0.043578000 | -1.357418000 |
| H | 2.395747000 | -4.617080000 | -3.155441000 |
| H | 4.637408000 | -4.626068000 | -2.069800000 |
| H | 5.595480000 | -2.497931000 | -1.208198000 |
| H | 1.323013000 | -0.021522000 | -3.529154000 |
| H | 4.338294000 | -0.002766000 | -0.133644000 |

<sup>6</sup>Int1<sub>(HS)</sub>

|    |              |              |              |   |              |              |              |
|----|--------------|--------------|--------------|---|--------------|--------------|--------------|
| Fe | 0.014361000  | 0.016516000  | -0.472226000 | H | 3.961379000  | -3.438044000 | -0.985069000 |
| C  | -0.024282000 | -0.038687000 | 2.002059000  | C | 3.885352000  | 1.883992000  | -0.320982000 |
| C  | 0.644098000  | -0.045873000 | 4.214158000  | H | 4.961786000  | 1.834156000  | -0.366751000 |
| H  | 1.352369000  | -0.037797000 | 5.025167000  | C | 3.109900000  | 2.974117000  | -0.024050000 |
| C  | -0.714889000 | -0.066758000 | 4.207074000  | H | 3.444127000  | 3.972449000  | 0.208595000  |
| H  | -1.431420000 | -0.087517000 | 5.010567000  | C | -1.862917000 | 3.884970000  | -0.428510000 |
| C  | -2.504183000 | -0.084614000 | 2.450917000  | H | -1.792481000 | 4.961148000  | -0.434763000 |
| H  | -3.126534000 | 0.124469000  | 3.325769000  | C | -2.957229000 | 3.116360000  | -0.716360000 |
| H  | -2.668885000 | 0.679689000  | 1.695709000  | H | -3.941720000 | 3.454453000  | -0.997510000 |
| H  | -2.770356000 | -1.060395000 | 2.039254000  | C | -3.390912000 | 0.597897000  | -0.743330000 |
| C  | 2.451808000  | 0.011276000  | 2.478556000  | C | -0.581461000 | -3.379137000 | -0.014814000 |
| H  | 3.065308000  | -0.216142000 | 3.355108000  | C | 3.402656000  | -0.581488000 | -0.719046000 |
| H  | 2.629557000  | -0.732453000 | 1.706477000  | C | 0.589731000  | 3.387708000  | 0.016841000  |
| H  | 2.716733000  | 0.998319000  | 2.093534000  | C | -4.840204000 | 0.827446000  | -1.007218000 |
| N  | 1.044356000  | -0.030913000 | 2.874165000  | C | -5.469309000 | 0.200827000  | -2.101219000 |
| N  | -1.101239000 | -0.059747000 | 2.862973000  | H | -4.876061000 | -0.429630000 | -2.755112000 |
| N  | -1.684516000 | -1.185523000 | -0.406064000 | C | -6.832348000 | 0.392818000  | -2.348977000 |
| N  | 1.217523000  | -1.675955000 | -0.288153000 | H | -7.298306000 | -0.092215000 | -3.201219000 |
| N  | 1.695473000  | 1.193211000  | -0.348132000 | C | -7.592906000 | 1.213510000  | -1.505642000 |
| N  | -1.207120000 | 1.685698000  | -0.277210000 | H | -8.650696000 | 1.363297000  | -1.698105000 |
| C  | -2.981998000 | -0.746370000 | -0.569403000 | C | -6.980422000 | 1.838715000  | -0.411528000 |
| C  | -1.712924000 | -2.539709000 | -0.129269000 | H | -7.564587000 | 2.469075000  | 0.252041000  |
| C  | 0.762339000  | -2.972712000 | -0.187752000 | C | -5.617383000 | 1.645735000  | -0.163726000 |
| C  | 2.564311000  | -1.711658000 | -0.599497000 | H | -5.144274000 | 2.120842000  | 0.689196000  |
| C  | 2.991529000  | 0.757476000  | -0.524892000 | C | -0.810140000 | -4.834606000 | 0.221561000  |
| C  | 1.721148000  | 2.548060000  | -0.083834000 | C | -1.615248000 | -5.603600000 | -0.641425000 |
| C  | -0.751977000 | 2.981317000  | -0.170201000 | H | -2.076770000 | -5.122714000 | -1.497166000 |
| C  | -2.551557000 | 1.724232000  | -0.603080000 | C | -1.806179000 | -6.970295000 | -0.411941000 |
| C  | -3.876799000 | -1.870498000 | -0.360284000 | H | -2.424357000 | -7.548998000 | -1.091466000 |
| H  | -4.953499000 | -1.817899000 | -0.397187000 | C | -1.192491000 | -7.593868000 | 0.682490000  |
| C  | -3.101831000 | -2.962056000 | -0.063827000 | H | -1.340262000 | -8.654652000 | 0.859611000  |
| H  | -3.437907000 | -3.958109000 | 0.176101000  | C | -0.383083000 | -6.841551000 | 1.543869000  |
| C  | 1.877161000  | -3.874071000 | -0.438017000 | H | 0.095992000  | -7.317138000 | 2.394267000  |
| H  | 1.809307000  | -4.950468000 | -0.446620000 | C | -0.192528000 | -5.475104000 | 1.314033000  |
| C  | 2.973206000  | -3.102478000 | -0.713894000 | H | 0.432515000  | -4.888290000 | 1.979086000  |



|   |              |              |              |
|---|--------------|--------------|--------------|
| C | 4.850667000  | -0.805039000 | -0.994866000 |
| C | 5.465198000  | -0.171374000 | -2.093027000 |
| H | 4.861525000  | 0.458719000  | -2.737642000 |
| C | 6.826220000  | -0.358372000 | -2.355597000 |
| H | 7.281768000  | 0.131864000  | -3.210483000 |
| C | 7.598066000  | -1.180411000 | -1.523802000 |
| H | 8.654303000  | -1.325913000 | -1.727930000 |
| C | 6.999268000  | -1.812728000 | -0.426190000 |
| H | 7.592446000  | -2.444330000 | 0.228184000  |
| C | 5.638163000  | -1.625215000 | -0.163340000 |
| H | 5.175313000  | -2.105967000 | 0.692184000  |
| C | 0.817321000  | 4.844793000  | 0.245256000  |
| C | 1.617775000  | 5.608407000  | -0.626604000 |
| H | 2.074069000  | 5.121891000  | -1.481913000 |
| C | 1.808205000  | 6.976725000  | -0.406292000 |
| H | 2.422525000  | 7.551858000  | -1.092303000 |
| C | 1.198718000  | 7.606507000  | 0.686993000  |
| H | 1.346237000  | 8.668556000  | 0.856787000  |
| C | 0.393435000  | 6.859158000  | 1.556500000  |
| H | -0.082726000 | 7.339856000  | 2.405696000  |
| C | 0.203088000  | 5.491039000  | 1.335918000  |
| H | -0.419269000 | 4.908021000  | 2.006946000  |
| O | 0.025650000  | 0.006784000  | -2.353579000 |
| H | -0.472060000 | -0.649950000 | -2.878324000 |

<sup>4</sup>Int1<sub>(IS)</sub>

|    |              |              |              |
|----|--------------|--------------|--------------|
| Fe | 0.008388000  | 0.005818000  | -0.478681000 |
| C  | -0.019098000 | -0.028088000 | 2.008125000  |
| C  | 0.650100000  | 0.016917000  | 4.218561000  |
| H  | 1.357184000  | 0.037745000  | 5.030646000  |
| C  | -0.710490000 | 0.014589000  | 4.211674000  |
| H  | -1.425873000 | 0.025031000  | 5.016656000  |
| C  | -2.492914000 | -0.039916000 | 2.432472000  |
| H  | -3.130028000 | 0.210586000  | 3.285582000  |
| H  | -2.636512000 | 0.691743000  | 1.640117000  |
| H  | -2.759872000 | -1.030039000 | 2.054899000  |
| C  | 2.451165000  | 0.006184000  | 2.458765000  |
| H  | 3.075933000  | -0.265877000 | 3.314543000  |
| H  | 2.592716000  | -0.715237000 | 1.657288000  |
| H  | 2.735090000  | 0.998166000  | 2.098035000  |
| N  | 1.049391000  | -0.012149000 | 2.877300000  |
| N  | -1.096054000 | -0.010743000 | 2.866416000  |
| N  | -1.612827000 | -1.182762000 | -0.416924000 |
| N  | 1.202373000  | -1.610345000 | -0.345356000 |
| N  | 1.620584000  | 1.178606000  | -0.369500000 |
| N  | -1.191057000 | 1.609340000  | -0.342570000 |
| C  | -2.918267000 | -0.784675000 | -0.631747000 |
| C  | -1.644883000 | -2.522285000 | -0.060960000 |
| C  | 0.793631000  | -2.915055000 | -0.153676000 |
| C  | 2.541976000  | -1.649607000 | -0.700803000 |
| C  | 2.924276000  | 0.783744000  | -0.594451000 |
| C  | 1.650060000  | 2.519108000  | -0.028362000 |
| C  | -0.784142000 | 2.913291000  | -0.151687000 |
| C  | -2.526941000 | 1.649212000  | -0.715376000 |
| C  | -3.803237000 | -1.901448000 | -0.379916000 |
| H  | -4.878618000 | -1.859210000 | -0.449537000 |
| C  | -3.024157000 | -2.958177000 | 0.007941000  |
| H  | -3.347890000 | -3.942376000 | 0.305486000  |

|   |              |              |              |
|---|--------------|--------------|--------------|
| C | 1.910404000  | -3.806014000 | -0.400606000 |
| H | 1.859675000  | -4.881734000 | -0.343774000 |
| C | 2.973482000  | -3.030972000 | -0.771374000 |
| H | 3.956833000  | -3.356405000 | -1.069659000 |
| C | 3.808597000  | 1.903714000  | -0.348999000 |
| H | 4.883583000  | 1.863828000  | -0.424756000 |
| C | 3.029092000  | 2.959388000  | 0.037324000  |
| H | 3.350290000  | 3.946477000  | 0.327717000  |
| C | -1.896712000 | 3.805540000  | -0.412708000 |
| H | -1.844038000 | 4.881263000  | -0.359211000 |
| C | -2.955768000 | 3.031540000  | -0.793660000 |
| H | -3.934628000 | 3.357510000  | -1.105653000 |
| C | -3.354386000 | 0.529706000  | -0.877170000 |
| C | -0.520232000 | -3.347415000 | 0.095829000  |
| C | 3.365790000  | -0.525301000 | -0.850782000 |
| C | 0.525792000  | 3.346425000  | 0.112026000  |
| C | -4.792446000 | 0.721939000  | -1.214665000 |
| C | -5.345314000 | 0.059744000  | -2.328414000 |
| H | -4.700780000 | -0.563944000 | -2.938864000 |
| C | -6.698153000 | 0.209741000  | -2.650053000 |
| H | -7.105464000 | -0.301573000 | -3.516813000 |
| C | -7.523886000 | 1.021526000  | -1.861121000 |
| H | -8.573815000 | 1.138581000  | -2.110797000 |
| C | -6.987420000 | 1.679533000  | -0.746555000 |
| H | -7.623021000 | 2.302083000  | -0.124170000 |
| C | -5.634390000 | 1.529026000  | -0.424875000 |
| H | -5.220921000 | 2.027820000  | 0.445343000  |
| C | -0.712398000 | -4.784362000 | 0.441776000  |
| C | -1.515672000 | -5.633850000 | -0.343622000 |
| H | -2.005783000 | -5.229988000 | -1.222926000 |
| C | -1.667169000 | -6.983709000 | -0.008897000 |
| H | -2.284687000 | -7.625952000 | -0.629345000 |

|   |              |              |              |
|---|--------------|--------------|--------------|
| C | -1.014757000 | -7.509205000 | 1.114210000  |
| H | -1.132063000 | -8.556959000 | 1.372799000  |
| C | -0.205650000 | -6.676152000 | 1.898134000  |
| H | 0.304093000  | -7.075793000 | 2.769496000  |
| C | -0.054375000 | -5.326643000 | 1.563263000  |
| H | 0.570596000  | -4.677038000 | 2.167311000  |
| C | 4.801971000  | -0.709903000 | -1.199772000 |
| C | 5.338575000  | -0.043057000 | -2.318770000 |
| H | 4.683293000  | 0.578356000  | -2.920038000 |
| C | 6.688405000  | -0.187237000 | -2.655547000 |
| H | 7.083976000  | 0.327551000  | -3.525678000 |
| C | 7.526222000  | -0.997158000 | -1.877370000 |
| H | 8.573826000  | -1.109278000 | -2.138936000 |
| C | 7.005275000  | -1.659622000 | -0.758087000 |
| H | 7.650581000  | -2.280574000 | -0.144108000 |
| C | 5.655223000  | -1.515382000 | -0.420949000 |
| H | 5.253663000  | -2.017242000 | 0.453164000  |
| C | 0.716150000  | 4.786123000  | 0.447400000  |
| C | 1.517467000  | 5.629394000  | -0.346493000 |
| H | 2.005221000  | 5.218175000  | -1.223633000 |
| C | 1.667488000  | 6.982206000  | -0.023086000 |
| H | 2.283188000  | 7.620090000  | -0.649793000 |
| C | 1.015664000  | 7.516286000  | 1.096378000  |
| H | 1.131960000  | 8.566356000  | 1.346002000  |
| C | 0.208028000  | 6.689168000  | 1.888014000  |
| H | -0.301669000 | 7.095733000  | 2.756232000  |
| C | 0.057949000  | 5.336661000  | 1.564492000  |
| H | -0.566297000 | 4.691632000  | 2.174314000  |
| O | 0.037955000  | 0.011378000  | -2.396339000 |
| H | -0.327893000 | -0.768270000 | -2.862080000 |

<sup>2</sup>Int1<sub>(LS)</sub>

|    |              |              |              |   |              |              |              |
|----|--------------|--------------|--------------|---|--------------|--------------|--------------|
| Fe | 0.005347000  | 0.002223000  | -0.275196000 | C | -0.213007000 | 2.994093000  | -0.008715000 |
| C  | -0.000711000 | -0.011220000 | 1.832575000  | C | -2.118308000 | 2.086791000  | -0.714611000 |
| C  | 0.652058000  | -0.165298000 | 4.034140000  | C | -4.067572000 | -1.151734000 | -0.469100000 |
| H  | 1.347680000  | -0.309545000 | 4.842733000  | H | -5.106543000 | -0.910420000 | -0.629525000 |
| C  | -0.678978000 | 0.099937000  | 4.029066000  | C | -3.537916000 | -2.320267000 | 0.008227000  |
| H  | -1.383912000 | 0.228703000  | 4.832190000  | H | -4.067170000 | -3.213487000 | 0.298316000  |
| C  | -2.453263000 | 0.450806000  | 2.311573000  | C | 1.131753000  | -4.084060000 | -0.312510000 |
| H  | -2.978618000 | 0.825046000  | 3.194800000  | H | 0.887411000  | -5.131229000 | -0.228308000 |
| H  | -2.483194000 | 1.200942000  | 1.528233000  | C | 2.289711000  | -3.522079000 | -0.775668000 |
| H  | -2.936194000 | -0.463195000 | 1.960608000  | H | 3.171446000  | -4.028470000 | -1.133647000 |
| C  | 2.446418000  | -0.485200000 | 2.331786000  | C | 4.070282000  | 1.162155000  | -0.451416000 |
| H  | 2.962470000  | -0.866541000 | 3.217479000  | H | 5.108010000  | 0.925982000  | -0.626588000 |
| H  | 2.486185000  | -1.228821000 | 1.542482000  | C | 3.540903000  | 2.326154000  | 0.031886000  |
| H  | 2.932381000  | 0.431846000  | 1.993317000  | H | 4.066829000  | 3.223801000  | 0.313994000  |
| N  | 1.050687000  | -0.230961000 | 2.696415000  | C | -1.119538000 | 4.084126000  | -0.315156000 |
| N  | -1.061857000 | 0.191906000  | 2.688374000  | H | -0.868213000 | 5.129939000  | -0.235945000 |
| N  | -1.782979000 | -0.860615000 | -0.343068000 | C | -2.273513000 | 3.527027000  | -0.789580000 |
| N  | 0.844260000  | -1.795782000 | -0.265237000 | H | -3.146550000 | 4.035759000  | -1.165035000 |
| N  | 1.790696000  | 0.856001000  | -0.291811000 | C | -3.125128000 | 1.139353000  | -0.952882000 |
| N  | -0.846512000 | 1.794033000  | -0.246020000 | C | -1.154273000 | -3.173448000 | 0.251485000  |
| C  | -2.967557000 | -0.231217000 | -0.674437000 | C | 3.130451000  | -1.129562000 | -0.937749000 |
| C  | -2.097613000 | -2.157858000 | 0.031844000  | C | 1.153039000  | 3.167538000  | 0.278246000  |
| C  | 0.214970000  | -2.999763000 | -0.023863000 | C | -4.468635000 | 1.592723000  | -1.408638000 |
| C  | 2.126625000  | -2.083588000 | -0.712172000 | C | -5.040261000 | 1.028923000  | -2.566422000 |
| C  | 2.968490000  | 0.236205000  | -0.644934000 | H | -4.474534000 | 0.287174000  | -3.120367000 |
| C  | 2.098815000  | 2.152749000  | 0.068791000  | C | -6.309105000 | 1.423671000  | -3.002637000 |

|   |              |              |              |
|---|--------------|--------------|--------------|
| H | -6.730130000 | 0.984610000  | -3.901900000 |
| C | -7.032129000 | 2.386700000  | -2.286370000 |
| H | -8.016661000 | 2.693987000  | -2.625088000 |
| C | -6.478442000 | 2.948366000  | -1.128422000 |
| H | -7.037122000 | 3.686692000  | -0.561195000 |
| C | -5.209672000 | 2.552554000  | -0.691950000 |
| H | -4.787148000 | 2.976437000  | 0.212840000  |
| C | -1.604275000 | -4.537157000 | 0.644874000  |
| C | -2.554740000 | -5.256102000 | -0.106200000 |
| H | -2.969527000 | -4.805414000 | -1.001041000 |
| C | -2.943266000 | -6.543878000 | 0.278173000  |
| H | -3.672323000 | -7.085701000 | -0.316588000 |
| C | -2.383464000 | -7.139934000 | 1.415864000  |
| H | -2.684543000 | -8.139879000 | 1.712356000  |
| C | -1.426625000 | -6.440919000 | 2.163457000  |
| H | -0.984814000 | -6.896868000 | 3.044282000  |
| C | -1.039291000 | -5.153079000 | 1.779516000  |
| H | -0.298026000 | -4.608022000 | 2.354977000  |
| C | 4.472770000  | -1.574143000 | -1.405892000 |
| C | 5.025253000  | -1.005152000 | -2.570407000 |
| H | 4.446302000  | -0.267120000 | -3.115611000 |
| C | 6.291736000  | -1.390901000 | -3.021531000 |
| H | 6.699184000  | -0.948015000 | -3.925160000 |
| C | 7.030324000  | -2.348812000 | -2.314148000 |
| H | 8.013203000  | -2.648393000 | -2.664486000 |
| C | 6.494978000  | -2.915092000 | -1.149852000 |
| H | 7.066128000  | -3.649190000 | -0.589544000 |
| C | 5.228411000  | -2.528861000 | -0.698234000 |
| H | 4.819962000  | -2.955899000 | 0.211651000  |
| C | 1.600580000  | 4.534598000  | 0.664250000  |
| C | 2.541619000  | 5.254214000  | -0.097664000 |
| H | 2.949380000  | 4.801544000  | -0.994667000 |
| C | 2.927360000  | 6.545134000  | 0.279029000  |
| H | 3.648852000  | 7.088190000  | -0.323758000 |
| C | 2.374300000  | 7.142732000  | 1.419285000  |
| H | 2.673437000  | 8.145074000  | 1.709712000  |
| C | 1.426352000  | 6.442685000  | 2.177095000  |
| H | 0.989387000  | 6.900228000  | 3.059538000  |
| C | 1.041191000  | 5.151891000  | 1.800569000  |
| H | 0.306054000  | 4.606170000  | 2.383329000  |
| O | 0.064462000  | 0.056530000  | -2.112721000 |
| H | -0.450505000 | -0.698807000 | -2.471506000 |

<sup>7</sup>TS2<sub>(HS)</sub>

|    |             |              |              |   |              |              |              |
|----|-------------|--------------|--------------|---|--------------|--------------|--------------|
| Fe | 0.658711000 | -0.043458000 | 0.232681000  | H | 2.287266000  | -2.811786000 | 2.210372000  |
| O  | 0.275671000 | -0.056505000 | -1.747854000 | N | 1.483466000  | -1.176884000 | 3.281254000  |
| C  | 1.238160000 | -0.091585000 | 2.474321000  | N | 1.413770000  | 0.973262000  | 3.325590000  |
| C  | 1.802076000 | -0.797353000 | 4.587837000  | N | -0.494083000 | 1.622723000  | 0.465852000  |
| H  | 2.027689000 | -1.518534000 | 5.354598000  | N | -0.947070000 | -1.242896000 | 0.677683000  |
| C  | 1.755543000 | 0.561974000  | 4.616374000  | N | 1.804680000  | -1.737292000 | -0.127821000 |
| H  | 1.925553000 | 1.263862000  | 5.414725000  | N | 2.327611000  | 1.136055000  | -0.090311000 |
| C  | 1.250206000 | 2.382431000  | 2.960665000  | C | -0.102075000 | 2.923605000  | 0.176660000  |
| H  | 1.632978000 | 2.996225000  | 3.780518000  | C | -1.736204000 | 1.669841000  | 1.079257000  |
| H  | 1.815478000 | 2.587960000  | 2.054525000  | C | -2.160948000 | -0.800380000 | 1.162984000  |
| H  | 0.197688000 | 2.614947000  | 2.788439000  | C | -1.072357000 | -2.595195000 | 0.370045000  |
| C  | 1.437029000 | -2.577033000 | 2.853745000  | C | 1.312430000  | -3.026271000 | -0.259887000 |
| H  | 1.464022000 | -3.209247000 | 3.745430000  | C | 3.188250000  | -1.793942000 | -0.174328000 |
| H  | 0.514011000 | -2.755199000 | 2.307292000  | C | 3.612593000  | 0.674874000  | -0.296861000 |

|   |              |              |              |   |              |              |              |
|---|--------------|--------------|--------------|---|--------------|--------------|--------------|
| C | 2.287200000  | 2.480089000  | -0.440581000 | H | 7.872813000  | -2.513093000 | -2.204433000 |
| C | -1.128463000 | 3.820403000  | 0.646213000  | C | 8.312786000  | -1.276985000 | -0.488465000 |
| H | -1.091030000 | 4.895322000  | 0.573295000  | H | 9.386519000  | -1.423186000 | -0.553087000 |
| C | -2.115354000 | 3.057345000  | 1.224606000  | C | 7.770574000  | -0.464759000 | 0.516313000  |
| H | -3.013917000 | 3.412743000  | 1.700602000  | H | 8.423542000  | 0.019097000  | 1.236427000  |
| C | -3.080230000 | -1.921623000 | 1.188685000  | C | 6.387021000  | -0.277426000 | 0.598206000  |
| H | -4.114522000 | -1.861647000 | 1.483885000  | H | 5.963392000  | 0.351343000  | 1.374693000  |
| C | -2.421603000 | -3.008965000 | 0.681479000  | C | -3.214255000 | -3.496876000 | -2.616397000 |
| H | -2.831814000 | -3.984168000 | 0.483901000  | C | -2.433285000 | -2.408563000 | -3.000849000 |
| C | 2.430903000  | -3.932669000 | -0.369868000 | C | -2.800469000 | -1.088714000 | -2.670052000 |
| H | 2.348557000  | -5.004747000 | -0.460585000 | C | -3.995273000 | -0.881811000 | -1.896162000 |
| C | 3.581829000  | -3.183762000 | -0.281870000 | C | -4.786237000 | -2.008363000 | -1.531966000 |
| H | 4.598017000  | -3.543655000 | -0.299414000 | C | -4.410151000 | -3.292183000 | -1.892870000 |
| C | 4.424518000  | 1.777311000  | -0.781479000 | C | -1.975849000 | 0.057751000  | -3.053030000 |
| H | 5.466091000  | 1.701031000  | -1.050992000 | C | -4.382980000 | 0.438392000  | -1.558108000 |
| C | 3.607793000  | 2.871440000  | -0.894482000 | C | -3.690327000 | 1.579468000  | -2.032867000 |
| H | 3.869267000  | 3.848040000  | -1.269421000 | C | -2.510793000 | 1.401113000  | -2.838337000 |
| C | 1.165005000  | 3.323143000  | -0.311483000 | C | -1.877613000 | 2.541611000  | -3.371200000 |
| C | -2.512560000 | 0.540814000  | 1.443306000  | H | -0.989287000 | 2.405497000  | -3.981493000 |
| C | -0.038635000 | -3.419829000 | -0.108681000 | C | -2.373457000 | 3.822151000  | -3.130707000 |
| C | 4.047466000  | -0.669417000 | -0.221160000 | C | -3.521812000 | 4.003957000  | -2.328857000 |
| C | 1.339382000  | 4.771811000  | -0.618819000 | C | -4.166481000 | 2.900840000  | -1.791707000 |
| C | 0.462413000  | 5.412174000  | -1.515593000 | H | -0.871510000 | 0.007576000  | -2.294559000 |
| H | -0.325940000 | 4.829230000  | -1.976448000 | H | -2.902318000 | -4.503978000 | -2.875014000 |
| C | 0.605024000  | 6.773052000  | -1.803453000 | H | -1.519337000 | -2.568890000 | -3.567298000 |
| H | -0.076253000 | 7.249241000  | -2.502387000 | H | -5.696156000 | -1.837438000 | -0.962545000 |
| C | 1.624291000  | 7.519910000  | -1.197530000 | H | -5.022111000 | -4.142545000 | -1.607281000 |
| H | 1.734765000  | 8.576532000  | -1.421149000 | H | -5.282053000 | 0.580443000  | -0.964977000 |
| C | 2.498066000  | 6.895464000  | -0.297664000 | H | -1.883460000 | 4.683497000  | -3.575408000 |
| H | 3.283943000  | 7.468969000  | 0.184570000  | H | -3.903192000 | 5.003693000  | -2.145294000 |
| C | 2.355430000  | 5.534021000  | -0.009226000 | H | -5.072109000 | 3.026909000  | -1.204090000 |
| H | 3.024980000  | 5.051516000  | 0.695131000  | H | -1.455272000 | -0.066549000 | -4.010878000 |
| C | -3.811150000 | 0.759890000  | 2.142116000  | H | 0.891764000  | -0.615286000 | -2.259941000 |
| C | -4.800369000 | 1.621901000  | 1.629277000  |   |              |              |              |
| H | -4.610625000 | 2.132889000  | 0.695068000  |   |              |              |              |
| C | -6.013353000 | 1.802722000  | 2.300667000  |   |              |              |              |
| H | -6.764753000 | 2.466711000  | 1.883482000  |   |              |              |              |
| C | -6.266338000 | 1.122177000  | 3.499490000  |   |              |              |              |
| H | -7.209090000 | 1.261443000  | 4.019470000  |   |              |              |              |
| C | -5.293705000 | 0.258783000  | 4.019705000  |   |              |              |              |
| H | -5.477998000 | -0.272001000 | 4.948969000  |   |              |              |              |
| C | -4.079227000 | 0.081150000  | 3.348683000  |   |              |              |              |
| H | -3.323962000 | -0.585357000 | 3.752059000  |   |              |              |              |
| C | -0.362692000 | -4.838143000 | -0.433327000 |   |              |              |              |
| C | -0.104753000 | -5.329389000 | -1.728090000 |   |              |              |              |
| H | 0.325247000  | -4.658801000 | -2.464429000 |   |              |              |              |
| C | -0.408912000 | -6.652245000 | -2.065330000 |   |              |              |              |
| H | -0.210395000 | -7.011987000 | -3.070301000 |   |              |              |              |
| C | -0.973087000 | -7.509399000 | -1.110792000 |   |              |              |              |
| H | -1.210850000 | -8.535964000 | -1.371602000 |   |              |              |              |
| C | -1.225414000 | -7.034922000 | 0.182882000  |   |              |              |              |
| H | -1.653077000 | -7.695856000 | 0.930656000  |   |              |              |              |
| C | -0.920277000 | -5.711417000 | 0.519290000  |   |              |              |              |
| H | -1.110319000 | -5.344512000 | 1.522387000  |   |              |              |              |
| C | 5.516865000  | -0.900228000 | -0.319381000 |   |              |              |              |
| C | 6.076676000  | -1.705368000 | -1.331515000 |   |              |              |              |
| H | 5.418876000  | -2.168107000 | -2.059187000 |   |              |              |              |
| C | 7.460229000  | -1.894302000 | -1.413312000 |   |              |              |              |

<sup>5</sup>TS2<sub>(HS)</sub>

|    |              |              |              |   |              |              |              |
|----|--------------|--------------|--------------|---|--------------|--------------|--------------|
| Fe | 0.737432000  | 0.012779000  | 0.397202000  | C | 1.873102000  | 7.087893000  | -0.449284000 |
| O  | 0.208302000  | -0.030509000 | -1.482452000 | H | 2.610229000  | 7.760759000  | -0.021442000 |
| C  | 1.285967000  | 0.040827000  | 2.502339000  | C | 1.878646000  | 5.735217000  | -0.092346000 |
| C  | 1.886455000  | -0.617294000 | 4.622864000  | H | 2.614905000  | 5.358875000  | 0.610095000  |
| H  | 2.156638000  | -1.319558000 | 5.392671000  | C | -3.857729000 | 0.452043000  | 2.139982000  |
| C  | 1.745480000  | 0.734083000  | 4.646687000  | C | -4.881600000 | 1.191580000  | 1.516832000  |
| H  | 1.863843000  | 1.449359000  | 5.442382000  | H | -4.669003000 | 1.692360000  | 0.581504000  |
| C  | 1.139190000  | 2.518378000  | 3.000304000  | C | -6.157460000 | 1.265041000  | 2.085220000  |
| H  | 1.523180000  | 3.145434000  | 3.809830000  | H | -6.935506000 | 1.836804000  | 1.587641000  |
| H  | 1.663964000  | 2.752351000  | 2.078209000  | C | -6.436566000 | 0.596466000  | 3.284697000  |
| H  | 0.071931000  | 2.704225000  | 2.866882000  | H | -7.427502000 | 0.653058000  | 3.724689000  |
| C  | 1.673574000  | -2.427158000 | 2.907278000  | C | -5.428679000 | -0.148744000 | 3.910558000  |
| H  | 1.758591000  | -3.040232000 | 3.808797000  | H | -5.635106000 | -0.670211000 | 4.840382000  |
| H  | 0.766076000  | -2.690681000 | 2.371476000  | C | -4.152498000 | -0.221438000 | 3.342117000  |
| H  | 2.538176000  | -2.599916000 | 2.263917000  | H | -3.370380000 | -0.800348000 | 3.822385000  |
| N  | 1.605757000  | -1.022772000 | 3.315658000  | C | 0.065937000  | -4.827249000 | -0.387943000 |
| N  | 1.382479000  | 1.118308000  | 3.353449000  | C | 0.421059000  | -5.283286000 | -1.673601000 |
| N  | -0.554489000 | 1.580420000  | 0.612164000  | H | 0.847366000  | -4.576616000 | -2.377703000 |
| N  | -0.796586000 | -1.343078000 | 0.840045000  | C | 0.216759000  | -6.616390000 | -2.043724000 |
| N  | 1.973129000  | -1.563992000 | -0.052486000 | H | 0.490550000  | -6.947324000 | -3.040984000 |
| N  | 2.286953000  | 1.349923000  | -0.035185000 | C | -0.345283000 | -7.521264000 | -1.132907000 |
| C  | -0.296475000 | 2.891673000  | 0.271768000  | H | -0.506378000 | -8.555790000 | -1.419658000 |
| C  | -1.805579000 | 1.517390000  | 1.195258000  | C | -0.694155000 | -7.083163000 | 0.151296000  |
| C  | -2.053668000 | -0.982128000 | 1.263236000  | H | -1.120119000 | -7.780312000 | 0.866495000  |
| C  | -0.832798000 | -2.670715000 | 0.463748000  | C | -0.487609000 | -5.749767000 | 0.520729000  |
| C  | 1.585425000  | -2.885294000 | -0.172761000 | H | -0.752369000 | -5.411363000 | 1.516715000  |
| C  | 3.354623000  | -1.503434000 | -0.151949000 | C | 5.595699000  | -0.441435000 | -0.426891000 |
| C  | 3.587958000  | 0.992310000  | -0.306475000 | C | 6.156631000  | -1.205485000 | -1.469262000 |
| C  | 2.114920000  | 2.670862000  | -0.399075000 | H | 5.495562000  | -1.719228000 | -2.158741000 |
| C  | -1.420524000 | 3.707400000  | 0.708302000  | C | 7.543876000  | -1.289822000 | -1.628240000 |
| H  | -1.486585000 | 4.777965000  | 0.599059000  | H | 7.957514000  | -1.878318000 | -2.441588000 |
| C  | -2.328480000 | 2.873332000  | 1.298739000  | C | 8.397086000  | -0.607375000 | -0.751089000 |
| H  | -3.269833000 | 3.146308000  | 1.746453000  | H | 9.473588000  | -0.672498000 | -0.875272000 |
| C  | -2.919615000 | -2.150033000 | 1.194623000  | C | 7.852007000  | 0.164984000  | 0.283085000  |
| H  | -3.970947000 | -2.153130000 | 1.432487000  | H | 8.505726000  | 0.699021000  | 0.966050000  |
| C  | -2.177943000 | -3.177095000 | 0.681403000  | C | 6.464843000  | 0.249047000  | 0.441184000  |
| H  | -2.522895000 | -4.161922000 | 0.417339000  | H | 6.038527000  | 0.848309000  | 1.239098000  |
| C  | 2.779041000  | -3.701314000 | -0.310305000 | C | -2.667602000 | -3.729548000 | -2.686584000 |
| H  | 2.782390000  | -4.776900000 | -0.394940000 | C | -2.040974000 | -2.519313000 | -2.975557000 |
| C  | 3.861128000  | -2.861880000 | -0.263565000 | C | -2.650210000 | -1.287848000 | -2.670053000 |
| H  | 4.903375000  | -3.134088000 | -0.310000000 | C | -3.930099000 | -1.294212000 | -2.020697000 |
| C  | 4.285978000  | 2.150767000  | -0.841940000 | C | -4.555973000 | -2.542738000 | -1.741410000 |
| H  | 5.316124000  | 2.157782000  | -1.162454000 | C | -3.941957000 | -3.737776000 | -2.075521000 |
| C  | 3.376453000  | 3.172022000  | -0.922110000 | C | -1.967039000 | -0.010086000 | -2.950610000 |
| H  | 3.536264000  | 4.161851000  | -1.319225000 | C | -4.563126000 | -0.063850000 | -1.712881000 |
| C  | 0.913352000  | 3.401944000  | -0.254805000 | C | -4.008796000 | 1.187134000  | -2.084047000 |
| C  | -2.496920000 | 0.333902000  | 1.539279000  | C | -2.736825000 | 1.229906000  | -2.748753000 |
| C  | 0.273138000  | -3.397335000 | -0.025850000 | C | -2.231876000 | 2.476288000  | -3.166430000 |
| C  | 4.119346000  | -0.319499000 | -0.249271000 | H | -1.266241000 | 2.506310000  | -3.663253000 |
| C  | 0.928499000  | 4.844736000  | -0.629892000 | C | -2.945557000 | 3.653733000  | -2.950653000 |
| C  | -0.032692000 | 5.348707000  | -1.527819000 | C | -4.193142000 | 3.618551000  | -2.288257000 |
| H  | -0.769030000 | 4.666113000  | -1.935117000 | C | -4.713136000 | 2.407027000  | -1.864306000 |
| C  | -0.039595000 | 6.700957000  | -1.883193000 | H | -0.993282000 | 0.032464000  | -2.169337000 |
| H  | -0.785727000 | 7.070692000  | -2.580550000 | H | -2.170127000 | -4.665838000 | -2.917077000 |
| C  | 0.914663000  | 7.576168000  | -1.347160000 | H | -1.058908000 | -2.513731000 | -3.441315000 |
| H  | 0.910365000  | 8.626034000  | -1.623554000 | H | -5.528495000 | -2.536503000 | -1.256332000 |

|   |              |              |              |
|---|--------------|--------------|--------------|
| H | -4.428728000 | -4.683010000 | -1.855108000 |
| H | -5.527641000 | -0.081429000 | -1.212631000 |
| H | -2.546155000 | 4.601603000  | -3.298379000 |
| H | -4.743971000 | 4.538876000  | -2.120608000 |
| H | -5.681100000 | 2.363786000  | -1.371419000 |
| H | -1.417645000 | -0.017885000 | -3.901342000 |
| H | 0.846478000  | -0.581747000 | -1.985552000 |

<sup>5</sup>TS2<sub>(IS)</sub>

|    |              |              |              |   |              |              |              |
|----|--------------|--------------|--------------|---|--------------|--------------|--------------|
| Fe | -0.607732000 | -0.121208000 | 0.156623000  | C | -0.747810000 | -4.800758000 | -1.210590000 |
| O  | -0.302415000 | -0.090840000 | -1.849760000 | C | 0.273982000  | -5.153195000 | -2.116858000 |
| C  | -1.135244000 | -0.226511000 | 2.461543000  | H | 1.001632000  | -4.399221000 | -2.396907000 |
| C  | -1.571829000 | 0.333757000  | 4.651228000  | C | 0.346845000  | -6.446151000 | -2.643763000 |
| H  | -1.753631000 | 0.999832000  | 5.477527000  | H | 1.135593000  | -6.697707000 | -3.346317000 |
| C  | -1.522334000 | -1.024766000 | 4.585483000  | C | -0.597196000 | -7.412764000 | -2.272046000 |
| H  | -1.643778000 | -1.778532000 | 5.344761000  | H | -0.541986000 | -8.416470000 | -2.681949000 |
| C  | -1.107846000 | -2.721919000 | 2.771937000  | C | -1.610229000 | -7.077851000 | -1.363799000 |
| H  | -1.551093000 | -3.396761000 | 3.509809000  | H | -2.336394000 | -7.825588000 | -1.059508000 |
| H  | -1.623510000 | -2.828367000 | 1.820359000  | C | -1.683372000 | -5.784713000 | -0.835161000 |
| H  | -0.051941000 | -2.967520000 | 2.636227000  | H | -2.455739000 | -5.532816000 | -0.116573000 |
| C  | -1.333311000 | 2.220471000  | 2.998691000  | C | 3.673480000  | -0.628095000 | 2.434901000  |
| H  | -1.313766000 | 2.808874000  | 3.920190000  | C | 4.776939000  | -1.449939000 | 2.131491000  |
| H  | -0.451613000 | 2.444368000  | 2.401885000  | H | 4.780187000  | -2.001729000 | 1.201254000  |
| H  | -2.226491000 | 2.471337000  | 2.421945000  | C | 5.873116000  | -1.524665000 | 2.997755000  |
| N  | -1.333281000 | 0.799902000  | 3.354021000  | H | 6.716646000  | -2.158408000 | 2.740554000  |
| N  | -1.260440000 | -1.345739000 | 3.249476000  | C | 5.893433000  | -0.777381000 | 4.182123000  |
| N  | 0.626277000  | -1.651079000 | 0.375398000  | H | 6.746007000  | -0.835685000 | 4.851665000  |
| N  | 0.866721000  | 1.131832000  | 0.605143000  | C | 4.806562000  | 0.050434000  | 4.492963000  |
| N  | -1.852057000 | 1.431253000  | -0.048977000 | H | 4.810743000  | 0.634210000  | 5.408531000  |
| N  | -2.116981000 | -1.390431000 | -0.181828000 | C | 3.710329000  | 0.124025000  | 3.628758000  |
| C  | 0.385160000  | -2.948083000 | -0.041137000 | H | 2.865412000  | 0.760642000  | 3.869492000  |
| C  | 1.809153000  | -1.659844000 | 1.103047000  | C | 0.000537000  | 4.730641000  | -0.328505000 |
| C  | 2.082646000  | 0.782815000  | 1.167905000  | C | -0.433850000 | 5.293422000  | -1.544669000 |
| C  | 0.923844000  | 2.490698000  | 0.310586000  | H | -0.857779000 | 4.639495000  | -2.297654000 |
| C  | -1.485514000 | 2.763030000  | -0.138569000 | C | -0.289226000 | 6.661222000  | -1.793562000 |
| C  | -3.241033000 | 1.384564000  | 0.040203000  | H | -0.620056000 | 7.074321000  | -2.741669000 |
| C  | -3.454377000 | -1.055932000 | -0.273920000 | C | 0.290920000  | 7.495637000  | -0.828283000 |
| C  | -1.974340000 | -2.673259000 | -0.696492000 | H | 0.407590000  | 8.557335000  | -1.022470000 |
| C  | 1.437267000  | -3.802945000 | 0.460744000  | C | 0.714153000  | 6.951310000  | 0.390933000  |
| H  | 1.491488000  | -4.867165000 | 0.296569000  | H | 1.151481000  | 7.592331000  | 1.150474000  |
| C  | 2.276343000  | -3.024469000 | 1.210352000  | C | 0.564182000  | 5.582692000  | 0.640480000  |
| H  | 3.143585000  | -3.343449000 | 1.763121000  | H | 0.877583000  | 5.165907000  | 1.591577000  |
| C  | 2.931118000  | 1.946516000  | 1.213949000  | C | -5.497987000 | 0.308170000  | 0.018862000  |
| H  | 3.943514000  | 1.949494000  | 1.584180000  | C | -6.223771000 | 1.150421000  | -0.846666000 |
| C  | 2.229819000  | 2.988962000  | 0.661327000  | H | -5.685538000 | 1.747557000  | -1.574557000 |
| H  | 2.570958000  | 3.994280000  | 0.488097000  | C | -7.620532000 | 1.202835000  | -0.788574000 |
| C  | -2.677516000 | 3.580944000  | -0.081240000 | H | -8.162933000 | 1.853335000  | -1.467896000 |
| H  | -2.679615000 | 4.659112000  | -0.107666000 | C | -8.318874000 | 0.408544000  | 0.130164000  |
| C  | -3.747250000 | 2.739524000  | 0.075254000  | H | -9.402785000 | 0.448805000  | 0.173716000  |
| H  | -4.784635000 | 3.009101000  | 0.190791000  | C | -7.609847000 | -0.444459000 | 0.986533000  |
| C  | -4.178819000 | -2.162872000 | -0.849022000 | H | -8.143094000 | -1.066181000 | 1.699255000  |
| H  | -5.238416000 | -2.163276000 | -1.050473000 | C | -6.213717000 | -0.496056000 | 0.928737000  |
| C  | -3.262148000 | -3.141126000 | -1.145872000 | H | -5.660804000 | -1.156620000 | 1.588644000  |
| H  | -3.443468000 | -4.086175000 | -1.631285000 | C | 1.642047000  | 3.782491000  | -3.682726000 |
| C  | -0.781287000 | -3.419371000 | -0.660989000 | C | 1.430484000  | 2.413351000  | -3.846131000 |
| C  | 2.476751000  | -0.514190000 | 1.556396000  | C | 2.217029000  | 1.467163000  | -3.162591000 |
| C  | -0.176793000 | 3.271902000  | -0.087384000 | C | 3.262072000  | 1.933714000  | -2.295975000 |
| C  | -4.012821000 | 0.218114000  | -0.030529000 | C | 3.456339000  | 3.335925000  | -2.145142000 |

|   |              |              |              |
|---|--------------|--------------|--------------|
| C | 2.658342000  | 4.247150000  | -2.821732000 |
| C | 1.917787000  | 0.031170000  | -3.232703000 |
| C | 4.084148000  | 0.990297000  | -1.630187000 |
| C | 3.948009000  | -0.409226000 | -1.826753000 |
| C | 2.890062000  | -0.905979000 | -2.661482000 |
| C | 2.779328000  | -2.295776000 | -2.859314000 |
| H | 1.972525000  | -2.666031000 | -3.486261000 |
| C | 3.675064000  | -3.186187000 | -2.267264000 |
| C | 4.726179000  | -2.700828000 | -1.460953000 |
| C | 4.858992000  | -1.335190000 | -1.248930000 |
| H | 0.867197000  | -0.063607000 | -2.499782000 |
| H | 1.020613000  | 4.495763000  | -4.215361000 |
| H | 0.644619000  | 2.057253000  | -4.507764000 |
| H | 4.248211000  | 3.678517000  | -1.485200000 |
| H | 2.803488000  | 5.313632000  | -2.682829000 |
| H | 4.886188000  | 1.352093000  | -0.993049000 |
| H | 3.564913000  | -4.254488000 | -2.428931000 |
| H | 5.430201000  | -3.394927000 | -1.010870000 |
| H | 5.665325000  | -0.947838000 | -0.632698000 |
| H | 1.498172000  | -0.294684000 | -4.192022000 |
| H | -0.987656000 | 0.419145000  | -2.324628000 |

<sup>3</sup>TS2<sub>(IS)</sub>

|    |              |              |              |
|----|--------------|--------------|--------------|
| Fe | -0.534837000 | -0.247745000 | 0.527147000  |
| O  | -0.085412000 | 0.143248000  | -1.313629000 |
| C  | -1.062268000 | -0.684419000 | 2.561685000  |
| C  | -1.543931000 | -0.470602000 | 4.803634000  |
| H  | -1.685787000 | 0.053359000  | 5.732660000  |
| C  | -1.659092000 | -1.785855000 | 4.493911000  |
| H  | -1.913242000 | -2.636846000 | 5.101325000  |
| C  | -1.377162000 | -3.215600000 | 2.473452000  |
| H  | -1.937683000 | -3.907871000 | 3.105789000  |
| H  | -1.866389000 | -3.139267000 | 1.508042000  |
| H  | -0.361482000 | -3.590992000 | 2.339173000  |
| C  | -0.998482000 | 1.643551000  | 3.602219000  |
| H  | -0.880719000 | 1.987396000  | 4.632245000  |
| H  | -0.105817000 | 1.893485000  | 3.038259000  |
| H  | -1.862872000 | 2.136168000  | 3.154021000  |
| N  | -1.181220000 | 0.188809000  | 3.625898000  |
| N  | -1.366905000 | -1.905277000 | 3.132284000  |
| N  | 0.559072000  | -1.901298000 | 0.398679000  |
| N  | 1.075892000  | 0.741057000  | 1.133142000  |
| N  | -1.597918000 | 1.437136000  | 0.505866000  |
| N  | -2.141015000 | -1.221423000 | -0.133403000 |
| C  | 0.219366000  | -3.038160000 | -0.316863000 |
| C  | 1.771876000  | -2.150843000 | 1.021714000  |
| C  | 2.262946000  | 0.190514000  | 1.582282000  |
| C  | 1.284095000  | 2.110910000  | 0.998743000  |
| C  | -1.072205000 | 2.722264000  | 0.571299000  |
| C  | -2.985098000 | 1.559152000  | 0.523808000  |
| C  | -3.449395000 | -0.761681000 | -0.150191000 |
| C  | -2.117742000 | -2.420103000 | -0.842543000 |
| C  | 1.243484000  | -4.046366000 | -0.109065000 |
| H  | 1.230532000  | -5.036772000 | -0.535785000 |
| C  | 2.168500000  | -3.520299000 | 0.749409000  |
| H  | 3.054696000  | -3.998286000 | 1.134290000  |
| C  | 3.240233000  | 1.241979000  | 1.756026000  |
| H  | 4.259423000  | 1.088546000  | 2.072550000  |

|   |              |              |              |
|---|--------------|--------------|--------------|
| C | 2.653039000  | 2.413063000  | 1.356303000  |
| H | 3.104252000  | 3.390750000  | 1.308377000  |
| C | -2.163583000 | 3.671448000  | 0.659728000  |
| H | -2.044567000 | 4.740781000  | 0.733586000  |
| C | -3.331340000 | 2.958878000  | 0.676198000  |
| H | -4.334158000 | 3.346027000  | 0.756882000  |
| C | -4.274293000 | -1.706137000 | -0.867424000 |
| H | -5.331368000 | -1.591579000 | -1.046929000 |
| C | -3.450696000 | -2.701707000 | -1.325175000 |
| H | -3.723172000 | -3.544875000 | -1.939079000 |
| C | -0.999624000 | -3.267084000 | -0.976571000 |
| C | 2.551724000  | -1.185931000 | 1.677431000  |
| C | 0.286143000  | 3.057463000  | 0.703874000  |
| C | -3.883141000 | 0.510252000  | 0.279497000  |
| C | -1.128767000 | -4.520171000 | -1.785462000 |
| C | -0.315412000 | -4.709021000 | -2.920204000 |
| H | 0.384802000  | -3.929268000 | -3.201857000 |
| C | -0.412043000 | -5.875520000 | -3.685693000 |
| H | 0.219269000  | -5.998506000 | -4.560190000 |
| C | -1.321706000 | -6.878133000 | -3.329923000 |
| H | -1.396988000 | -7.783472000 | -3.923899000 |
| C | -2.132400000 | -6.706512000 | -2.201717000 |
| H | -2.834587000 | -7.482750000 | -1.913266000 |
| C | -2.036307000 | -5.539560000 | -1.436535000 |
| H | -2.659046000 | -5.418209000 | -0.555987000 |
| C | 3.806615000  | -1.589844000 | 2.384770000  |
| C | 4.898063000  | -2.164097000 | 1.704682000  |
| H | 4.842644000  | -2.288641000 | 0.628962000  |
| C | 6.056771000  | -2.531185000 | 2.397593000  |
| H | 6.891103000  | -2.965957000 | 1.855570000  |
| C | 6.149466000  | -2.327140000 | 3.779362000  |
| H | 7.049907000  | -2.611943000 | 4.314638000  |
| C | 5.076932000  | -1.744597000 | 4.464702000  |
| H | 5.141280000  | -1.577526000 | 5.535639000  |
| C | 3.918211000  | -1.377226000 | 3.773141000  |

|   |              |              |              |
|---|--------------|--------------|--------------|
| H | 3.086139000  | -0.927871000 | 4.306312000  |
| C | 0.655883000  | 4.506798000  | 0.627195000  |
| C | 0.489164000  | 5.212679000  | -0.580083000 |
| H | 0.124458000  | 4.688307000  | -1.456668000 |
| C | 0.817583000  | 6.570001000  | -0.663472000 |
| H | 0.690580000  | 7.094754000  | -1.605260000 |
| C | 1.313849000  | 7.247240000  | 0.456494000  |
| H | 1.567880000  | 8.300562000  | 0.390288000  |
| C | 1.481607000  | 6.557291000  | 1.662861000  |
| H | 1.860977000  | 7.075420000  | 2.538375000  |
| C | 1.155226000  | 5.199702000  | 1.747287000  |
| H | 1.279153000  | 4.671753000  | 2.687580000  |
| C | -5.356175000 | 0.765389000  | 0.323845000  |
| C | -5.974368000 | 1.701644000  | -0.528513000 |
| H | -5.369303000 | 2.247759000  | -1.244628000 |
| C | -7.355760000 | 1.915420000  | -0.475495000 |
| H | -7.813861000 | 2.636986000  | -1.144909000 |
| C | -8.147076000 | 1.195099000  | 0.426909000  |
| H | -9.218918000 | 1.361530000  | 0.467056000  |
| C | -7.547747000 | 0.254192000  | 1.272558000  |
| H | -8.153811000 | -0.310827000 | 1.974130000  |
| C | -6.166897000 | 0.039753000  | 1.219177000  |
| H | -5.703838000 | -0.689130000 | 1.876823000  |
| C | -0.249284000 | 3.029193000  | -4.938843000 |
| C | 0.099065000  | 1.738397000  | -4.545150000 |
| C | 1.282469000  | 1.485060000  | -3.818129000 |
| C | 2.146069000  | 2.591405000  | -3.497238000 |
| C | 1.762607000  | 3.900905000  | -3.906850000 |
| C | 0.587220000  | 4.118360000  | -4.611614000 |
| C | 1.608578000  | 0.157139000  | -3.303433000 |
| C | 3.368735000  | 2.341461000  | -2.821599000 |
| C | 3.819671000  | 1.029733000  | -2.529609000 |
| C | 2.964646000  | -0.091451000 | -2.829073000 |
| C | 3.458642000  | -1.395088000 | -2.611497000 |
| H | 2.818447000  | -2.242154000 | -2.843229000 |
| C | 4.742576000  | -1.610344000 | -2.115570000 |
| C | 5.574368000  | -0.513283000 | -1.799029000 |
| C | 5.117226000  | 0.780034000  | -1.996449000 |
| H | 0.811420000  | 0.106083000  | -2.153003000 |
| H | -1.161359000 | 3.196848000  | -5.503803000 |
| H | -0.544802000 | 0.900871000  | -4.804041000 |
| H | 2.418143000  | 4.732887000  | -3.662897000 |
| H | 0.315460000  | 5.122704000  | -4.922941000 |
| H | 4.018173000  | 3.181805000  | -2.588997000 |
| H | 5.107757000  | -2.624690000 | -1.981543000 |
| H | 6.572741000  | -0.684456000 | -1.407638000 |
| H | 5.755267000  | 1.628995000  | -1.765305000 |
| H | 1.145280000  | -0.675523000 | -3.841232000 |
| H | -0.816246000 | 0.665535000  | -1.700194000 |

<sup>3</sup>TS2<sub>(LS)</sub>

|    |              |              |              |
|----|--------------|--------------|--------------|
| Fe | -0.630051000 | -0.104962000 | 0.241073000  |
| O  | -0.238438000 | -0.027677000 | -1.621287000 |
| C  | -1.089996000 | -0.243352000 | 2.252525000  |
| C  | -1.586665000 | 0.293170000  | 4.428576000  |
| H  | -1.779841000 | 0.953781000  | 5.255845000  |
| C  | -1.562264000 | -1.060958000 | 4.344682000  |
| H  | -1.722985000 | -1.825194000 | 5.085069000  |

|   |              |              |             |
|---|--------------|--------------|-------------|
| C | -1.146120000 | -2.767686000 | 2.577778000 |
| H | -1.612444000 | -3.399019000 | 3.339218000 |
| H | -1.666692000 | -2.895325000 | 1.634610000 |
| H | -0.098472000 | -3.049376000 | 2.461319000 |
| C | -1.281994000 | 2.218513000  | 2.877026000 |
| H | -1.251119000 | 2.741828000  | 3.836544000 |
| H | -0.399643000 | 2.472094000  | 2.299367000 |



|   |              |              |              |   |              |              |              |
|---|--------------|--------------|--------------|---|--------------|--------------|--------------|
| H | -2.177198000 | 2.515313000  | 2.328078000  | C | -0.370387000 | 5.234215000  | -1.623133000 |
| N | -1.299094000 | 0.778753000  | 3.150933000  | H | -0.808174000 | 4.568342000  | -2.357235000 |
| N | -1.262625000 | -1.374479000 | 3.017125000  | C | -0.210888000 | 6.593625000  | -1.905443000 |
| N | 0.611382000  | -1.631640000 | 0.387703000  | H | -0.542939000 | 6.987989000  | -2.861139000 |
| N | 0.866071000  | 1.110016000  | 0.650918000  | C | 0.386160000  | 7.443437000  | -0.964277000 |
| N | -1.846819000 | 1.439264000  | -0.008054000 | H | 0.515409000  | 8.498625000  | -1.184374000 |
| N | -2.126495000 | -1.322187000 | -0.199506000 | C | 0.808365000  | 6.922446000  | 0.265337000  |
| C | 0.380294000  | -2.899949000 | -0.107963000 | H | 1.257017000  | 7.575588000  | 1.007818000  |
| C | 1.783475000  | -1.679068000 | 1.125092000  | C | 0.641863000  | 5.562311000  | 0.548512000  |
| C | 2.065974000  | 0.755768000  | 1.242486000  | H | 0.952053000  | 5.166720000  | 1.509444000  |
| C | 0.948453000  | 2.458194000  | 0.323218000  | C | -5.504581000 | 0.360845000  | 0.120688000  |
| C | -1.453201000 | 2.756869000  | -0.169094000 | C | -6.252840000 | 1.205604000  | -0.723263000 |
| C | -3.235620000 | 1.425760000  | 0.081319000  | H | -5.734468000 | 1.804242000  | -1.464029000 |
| C | -3.469170000 | -1.001423000 | -0.244191000 | C | -7.647785000 | 1.256945000  | -0.630168000 |
| C | -1.982427000 | -2.589230000 | -0.757768000 | H | -8.207059000 | 1.910176000  | -1.293072000 |
| C | 1.427599000  | -3.784651000 | 0.365467000  | C | -8.323138000 | 0.457674000  | 0.301203000  |
| H | 1.487448000  | -4.837643000 | 0.142117000  | H | -9.405668000 | 0.497112000  | 0.371772000  |
| C | 2.253502000  | -3.049986000 | 1.168719000  | C | -7.592580000 | -0.400406000 | 1.134145000  |
| H | 3.117326000  | -3.396825000 | 1.709889000  | H | -8.107835000 | -1.027773000 | 1.855194000  |
| C | 2.927850000  | 1.910464000  | 1.289879000  | C | -6.198248000 | -0.450166000 | 1.041834000  |
| H | 3.932454000  | 1.908100000  | 1.681064000  | H | -5.629050000 | -1.115589000 | 1.682941000  |
| C | 2.253149000  | 2.948436000  | 0.698473000  | C | 1.727830000  | 3.774174000  | -3.629284000 |
| H | 2.615082000  | 3.942905000  | 0.506366000  | C | 1.464023000  | 2.412590000  | -3.761927000 |
| C | -2.631122000 | 3.601453000  | -0.144035000 | C | 2.224399000  | 1.450962000  | -3.066847000 |
| H | -2.613654000 | 4.676718000  | -0.224634000 | C | 3.294835000  | 1.897265000  | -2.218178000 |
| C | -3.715914000 | 2.791985000  | 0.060098000  | C | 3.534078000  | 3.295361000  | -2.091341000 |
| H | -4.747126000 | 3.088408000  | 0.163816000  | C | 2.764770000  | 4.219755000  | -2.781267000 |
| C | -4.197597000 | -2.094627000 | -0.836357000 | C | 1.892941000  | 0.028441000  | -3.114225000 |
| H | -5.261686000 | -2.097569000 | -1.013179000 | C | 4.098099000  | 0.938439000  | -1.553837000 |
| C | -3.278227000 | -3.051611000 | -1.191998000 | C | 3.935210000  | -0.455868000 | -1.754813000 |
| H | -3.464596000 | -3.981793000 | -1.703554000 | C | 2.858880000  | -0.927424000 | -2.583315000 |
| C | -0.788899000 | -3.339602000 | -0.748229000 | C | 2.740587000  | -2.312069000 | -2.816790000 |
| C | 2.444818000  | -0.548809000 | 1.624026000  | H | 1.931226000  | -2.658690000 | -3.453477000 |
| C | -0.135286000 | 3.243453000  | -0.119694000 | C | 3.634758000  | -3.221087000 | -2.254702000 |
| C | -4.021965000 | 0.268805000  | 0.036624000  | C | 4.693664000  | -2.762125000 | -1.441740000 |
| C | -0.777595000 | -4.716475000 | -1.314740000 | C | 4.841065000  | -1.403132000 | -1.202119000 |
| C | 0.227513000  | -5.079389000 | -2.234259000 | H | 0.849635000  | -0.030291000 | -2.271228000 |
| H | 0.963724000  | -4.336363000 | -2.516678000 | H | 1.129851000  | 4.499036000  | -4.172380000 |
| C | 0.278387000  | -6.371176000 | -2.767079000 | H | 0.661566000  | 2.072034000  | -4.411936000 |
| H | 1.055846000  | -6.629193000 | -3.479854000 | H | 4.341063000  | 3.622841000  | -1.441992000 |
| C | -0.671774000 | -7.328249000 | -2.387022000 | H | 2.946408000  | 5.283181000  | -2.663781000 |
| H | -0.633909000 | -8.330980000 | -2.801276000 | H | 4.912416000  | 1.283920000  | -0.923235000 |
| C | -1.667526000 | -6.984654000 | -1.463162000 | H | 3.517725000  | -4.284278000 | -2.442774000 |
| H | -2.397972000 | -7.724847000 | -1.150630000 | H | 5.394443000  | -3.472172000 | -1.012105000 |
| C | -1.717780000 | -5.692680000 | -0.929196000 | H | 5.658436000  | -1.035584000 | -0.588226000 |
| H | -2.477053000 | -5.435023000 | -0.198907000 | H | 1.386883000  | -0.296938000 | -4.029992000 |
| C | 3.631245000  | -0.682950000 | 2.511804000  | H | -0.993103000 | 0.322520000  | -2.133135000 |
| C | 4.736263000  | -1.500801000 | 2.202776000  |   |              |              |              |
| H | 4.748614000  | -2.033078000 | 1.261196000  |   |              |              |              |
| C | 5.824336000  | -1.593513000 | 3.077458000  |   |              |              |              |
| H | 6.669188000  | -2.223872000 | 2.816176000  |   |              |              |              |
| C | 5.835724000  | -0.867743000 | 4.275312000  |   |              |              |              |
| H | 6.682111000  | -0.940203000 | 4.951319000  |   |              |              |              |
| C | 4.748749000  | -0.041648000 | 4.590401000  |   |              |              |              |
| H | 4.747182000  | 0.527468000  | 5.515216000  |   |              |              |              |
| C | 3.660535000  | 0.049790000  | 3.717755000  |   |              |              |              |
| H | 2.816411000  | 0.686919000  | 3.960372000  |   |              |              |              |
| C | 0.064710000  | 4.693106000  | -0.397319000 |   |              |              |              |

<sup>5</sup>Int2<sub>(HS)</sub>

|    |              |              |              |   |              |              |              |
|----|--------------|--------------|--------------|---|--------------|--------------|--------------|
| Fe | 0.030837000  | 0.035075000  | 0.030466000  | C | 7.157112000  | 1.061767000  | -0.328432000 |
| O  | 0.010062000  | 0.078011000  | -2.098178000 | H | 7.825761000  | 1.525885000  | 0.390335000  |
| C  | 0.007209000  | -0.106438000 | 2.007379000  | C | 5.788083000  | 0.979641000  | -0.051555000 |
| C  | -0.630392000 | -0.466955000 | 4.202973000  | H | 5.393099000  | 1.377944000  | 0.877436000  |
| H  | -1.310702000 | -0.726309000 | 4.996132000  | C | -0.381498000 | 4.956040000  | 0.129474000  |
| C  | 0.676916000  | -0.101522000 | 4.223224000  | C | 0.151600000  | 5.845925000  | -0.822733000 |
| H  | 1.368071000  | 0.028661000  | 5.038450000  | H | 0.683517000  | 5.444077000  | -1.678468000 |
| C  | 2.397535000  | 0.550915000  | 2.526988000  | C | -0.009970000 | 7.228306000  | -0.679188000 |
| H  | 3.032148000  | 0.488198000  | 3.415566000  | H | 0.404031000  | 7.899088000  | -1.425965000 |
| H  | 2.795906000  | -0.099542000 | 1.752030000  | C | -0.713589000 | 7.745747000  | 0.416323000  |
| H  | 2.381254000  | 1.578657000  | 2.158306000  | H | -0.839739000 | 8.818326000  | 0.526986000  |
| C  | -2.380147000 | -0.813190000 | 2.447358000  | C | -1.258208000 | 6.870166000  | 1.364898000  |
| H  | -3.028795000 | -0.782905000 | 3.327663000  | H | -1.806715000 | 7.262435000  | 2.215957000  |
| H  | -2.731082000 | -0.090083000 | 1.715155000  | C | -1.095063000 | 5.488156000  | 1.220842000  |
| H  | -2.406305000 | -1.813516000 | 2.009075000  | H | -1.517188000 | 4.805965000  | 1.951680000  |
| N  | -1.023047000 | -0.461703000 | 2.861685000  | C | -4.903840000 | -0.327067000 | -0.971804000 |
| N  | 1.050523000  | 0.113435000  | 2.893833000  | C | -5.379700000 | -1.093776000 | -2.054444000 |
| N  | 1.382480000  | 1.600825000  | -0.223113000 | H | -4.661765000 | -1.586468000 | -2.701757000 |
| N  | -1.587293000 | 1.377175000  | -0.218256000 | C | -6.751373000 | -1.218678000 | -2.297353000 |
| N  | -1.352711000 | -1.543318000 | -0.413801000 | H | -7.097538000 | -1.808721000 | -3.140521000 |
| N  | 1.587033000  | -1.328197000 | -0.281735000 | C | -7.676072000 | -0.579427000 | -1.460906000 |
| C  | 2.732598000  | 1.489674000  | -0.483175000 | H | -8.740822000 | -0.675219000 | -1.649486000 |
| C  | 1.068923000  | 2.939511000  | -0.095126000 | C | -7.217414000 | 0.182705000  | -0.378402000 |
| C  | -1.449700000 | 2.751819000  | -0.166926000 | H | -7.927016000 | 0.674217000  | 0.280303000  |
| C  | -2.897096000 | 1.087590000  | -0.565221000 | C | -5.845568000 | 0.305494000  | -0.135382000 |
| C  | -2.722150000 | -1.427249000 | -0.567526000 | H | -5.489645000 | 0.887831000  | 0.707849000  |
| C  | -1.053053000 | -2.877004000 | -0.182671000 | C | 0.376670000  | -4.894449000 | 0.117017000  |
| C  | 1.462630000  | -2.698716000 | -0.219366000 | C | -0.218079000 | -5.810943000 | -0.772076000 |
| C  | 2.901362000  | -1.024404000 | -0.571048000 | H | -0.777336000 | -5.432003000 | -1.620802000 |
| C  | 3.310446000  | 2.825166000  | -0.478767000 | C | -0.082463000 | -7.189485000 | -0.576297000 |
| H  | 4.347764000  | 3.055672000  | -0.663418000 | H | -0.543441000 | -7.880565000 | -1.275555000 |
| C  | 2.301141000  | 3.709687000  | -0.202216000 | C | 0.654999000  | -7.677989000 | 0.510179000  |
| H  | 2.378292000  | 4.781475000  | -0.115304000 | H | 0.760865000  | -8.747783000 | 0.661551000  |
| C  | -2.740045000 | 3.358694000  | -0.470930000 | C | 1.258697000  | -6.777068000 | 1.397486000  |
| H  | -2.925928000 | 4.420068000  | -0.522907000 | H | 1.831918000  | -7.146813000 | 2.242307000  |
| C  | -3.617588000 | 2.343354000  | -0.735456000 | C | 1.121658000  | -5.398973000 | 1.201400000  |
| H  | -4.648153000 | 2.431865000  | -1.041379000 | H | 1.587142000  | -4.697573000 | 1.886036000  |
| C  | -3.317352000 | -2.740516000 | -0.396784000 | H | -0.455941000 | 0.880299000  | -2.403063000 |
| H  | -4.374626000 | -2.952207000 | -0.434577000 | H | -0.517785000 | -0.721500000 | -2.300953000 |
| C  | -2.299406000 | -3.623387000 | -0.135499000 |   |              |              |              |
| H  | -2.386979000 | -4.679329000 | 0.065414000  |   |              |              |              |
| C  | 2.776661000  | -3.295550000 | -0.442559000 |   |              |              |              |
| H  | 2.980860000  | -4.354701000 | -0.458020000 |   |              |              |              |
| C  | 3.655074000  | -2.271512000 | -0.662831000 |   |              |              |              |
| H  | 4.711423000  | -2.344167000 | -0.869123000 |   |              |              |              |
| C  | 3.441283000  | 0.278425000  | -0.671841000 |   |              |              |              |
| C  | -0.240424000 | 3.474433000  | -0.013749000 |   |              |              |              |
| C  | -3.440261000 | -0.211607000 | -0.709793000 |   |              |              |              |
| C  | 0.251808000  | -3.419893000 | -0.079975000 |   |              |              |              |
| C  | 4.902951000  | 0.378047000  | -0.966303000 |   |              |              |              |
| C  | 5.426025000  | -0.144885000 | -2.164314000 |   |              |              |              |
| H  | 4.747431000  | -0.609063000 | -2.872303000 |   |              |              |              |
| C  | 6.795036000  | -0.065003000 | -2.441476000 |   |              |              |              |
| H  | 7.180531000  | -0.469093000 | -3.372627000 |   |              |              |              |
| C  | 7.665475000  | 0.539607000  | -1.524891000 |   |              |              |              |
| H  | 8.727685000  | 0.602255000  | -1.740154000 |   |              |              |              |

<sup>3</sup>Int2<sub>(IS)</sub>

|    |              |              |              |   |              |              |              |
|----|--------------|--------------|--------------|---|--------------|--------------|--------------|
| Fe | -0.000169000 | 0.000273000  | -0.259836000 | C | 4.994555000  | -5.119512000 | -1.152413000 |
| O  | 0.000786000  | 0.000763000  | -2.022936000 | H | 5.279553000  | -5.988800000 | -0.567172000 |
| C  | -0.001076000 | -0.000039000 | 1.953663000  | C | 3.973575000  | -4.280315000 | -0.693265000 |
| C  | -0.570865000 | 0.369254000  | 4.145053000  | H | 3.481499000  | -4.497284000 | 0.249239000  |
| H  | -1.167385000 | 0.751185000  | 4.954887000  | C | 3.183904000  | 3.661211000  | 0.638319000  |
| C  | 0.567632000  | -0.370676000 | 4.145125000  | C | 4.280959000  | 4.026559000  | -0.167894000 |
| H  | 1.163738000  | -0.753084000 | 4.955041000  | H | 4.454311000  | 3.495858000  | -1.097979000 |
| C  | 2.107533000  | -1.340059000 | 2.428459000  | C | 5.130623000  | 5.071848000  | 0.207353000  |
| H  | 2.447512000  | -1.899147000 | 3.303045000  | H | 5.965466000  | 5.341934000  | -0.432291000 |
| H  | 1.872301000  | -2.034045000 | 1.627001000  | C | 4.901895000  | 5.776196000  | 1.395812000  |
| H  | 2.897179000  | -0.662518000 | 2.099776000  | H | 5.562514000  | 6.587116000  | 1.686375000  |
| C  | -2.109715000 | 1.339978000  | 2.428235000  | C | 3.813042000  | 5.429449000  | 2.203642000  |
| H  | -2.449618000 | 1.899131000  | 3.302812000  | H | 3.626524000  | 5.969663000  | 3.126941000  |
| H  | -1.874032000 | 2.033906000  | 1.626881000  | C | 2.963166000  | 4.383815000  | 1.827965000  |
| H  | -2.899565000 | 0.662761000  | 2.099360000  | H | 2.121800000  | 4.112899000  | 2.457745000  |
| N  | -0.906554000 | 0.590085000  | 2.806657000  | C | -3.580575000 | 3.142129000  | -1.427686000 |
| N  | 0.904027000  | -0.590644000 | 2.806765000  | C | -4.266089000 | 2.865131000  | -2.629230000 |
| N  | 1.987678000  | 0.158127000  | -0.362377000 | H | -3.986037000 | 1.987049000  | -3.202557000 |
| N  | -0.117988000 | 1.981298000  | -0.266327000 | C | -5.288462000 | 3.700533000  | -3.087959000 |
| N  | -1.987751000 | -0.157900000 | -0.362472000 | H | -5.795782000 | 3.468690000  | -4.019699000 |
| N  | 0.117779000  | -1.980843000 | -0.268289000 | C | -5.655022000 | 4.835263000  | -2.353597000 |
| C  | 2.866946000  | -0.876705000 | -0.666901000 | H | -6.448116000 | 5.485376000  | -2.709556000 |
| C  | 2.767636000  | 1.254772000  | 0.033638000  | C | -4.993922000 | 5.119752000  | -1.153500000 |
| C  | 0.921292000  | 2.885005000  | -0.007347000 | H | -5.279191000 | 5.989101000  | -0.568480000 |
| C  | -1.218119000 | 2.727573000  | -0.700652000 | C | -3.973209000 | 4.280549000  | -0.693768000 |
| C  | -2.866673000 | 0.876847000  | -0.667101000 | H | -3.481571000 | 4.497577000  | 0.248955000  |
| C  | -2.767746000 | -1.254688000 | 0.032691000  | C | -3.183941000 | -3.661062000 | 0.637629000  |
| C  | -0.921353000 | -2.884826000 | -0.008070000 | C | -4.280525000 | -4.027023000 | -0.168926000 |
| C  | 1.218364000  | -2.727517000 | -0.701424000 | H | -4.453556000 | -3.496803000 | -1.099348000 |
| C  | 4.208030000  | -0.427908000 | -0.452161000 | C | -5.130206000 | -5.072246000 | 0.206490000  |
| H  | 5.092732000  | -1.028734000 | -0.591598000 | H | -5.964713000 | -5.342806000 | -0.433391000 |
| C  | 4.142710000  | 0.876291000  | 0.013958000  | C | -4.901937000 | -5.775885000 | 1.395452000  |
| H  | 4.970453000  | 1.509465000  | 0.290155000  | H | -5.562566000 | -6.586749000 | 1.686148000  |
| C  | 0.443637000  | 4.226667000  | -0.272235000 | C | -3.813559000 | -5.428489000 | 2.203645000  |
| H  | 1.040135000  | 5.119940000  | -0.173124000 | H | -3.627429000 | -5.968138000 | 3.127351000  |
| C  | -0.833900000 | 4.129421000  | -0.742178000 | C | -2.963673000 | -4.382917000 | 1.827806000  |
| H  | -1.466012000 | 4.931967000  | -1.086250000 | H | -2.122688000 | -4.111472000 | 2.457866000  |
| C  | -4.208005000 | 0.427936000  | -0.453297000 | H | 0.733623000  | 0.391694000  | -2.526996000 |
| H  | -5.092619000 | 1.028792000  | -0.593162000 | H | -0.714289000 | -0.417935000 | -2.530006000 |
| C  | -4.142951000 | -0.876352000 | 0.012372000  |   |              |              |              |
| H  | -4.970780000 | -1.509720000 | 0.287867000  |   |              |              |              |
| C  | -0.443313000 | -4.226428000 | -0.271816000 |   |              |              |              |
| H  | -1.039533000 | -5.119798000 | -0.171852000 |   |              |              |              |
| C  | 0.834315000  | -4.129382000 | -0.741742000 |   |              |              |              |
| H  | 1.466626000  | -4.932209000 | -1.084798000 |   |              |              |              |
| C  | 2.498068000  | -2.226476000 | -0.957220000 |   |              |              |              |
| C  | 2.251085000  | 2.559412000  | 0.250434000  |   |              |              |              |
| C  | -2.497744000 | 2.226595000  | -0.956847000 |   |              |              |              |
| C  | -2.251162000 | -2.559257000 | 0.249567000  |   |              |              |              |
| C  | 3.581229000  | -3.141966000 | -1.427457000 |   |              |              |              |
| C  | 4.267442000  | -2.865034000 | -2.628622000 |   |              |              |              |
| H  | 3.987904000  | -1.986875000 | -3.202108000 |   |              |              |              |
| C  | 5.290111000  | -3.700393000 | -3.086770000 |   |              |              |              |
| H  | 5.797975000  | -3.468520000 | -4.018206000 |   |              |              |              |
| C  | 5.656292000  | -4.835089000 | -2.352175000 |   |              |              |              |
| H  | 6.449600000  | -5.485191000 | -2.707667000 |   |              |              |              |

<sup>1</sup>Int2<sub>(LS)</sub>

|    |              |              |              |   |              |              |              |
|----|--------------|--------------|--------------|---|--------------|--------------|--------------|
| Fe | -0.014952000 | 0.004006000  | -0.155042000 | C | -6.858456000 | 1.991109000  | -1.042948000 |
| O  | -0.001445000 | 0.007566000  | -2.297886000 | H | -7.510388000 | 2.643639000  | -0.469963000 |
| C  | -0.002164000 | -0.000583000 | 1.829641000  | C | -5.540630000 | 1.783188000  | -0.621700000 |
| C  | 0.685444000  | -0.044807000 | 4.033470000  | H | -5.171042000 | 2.268007000  | 0.275606000  |
| H  | 1.401577000  | -0.083073000 | 4.836239000  | C | -0.946134000 | -4.733349000 | 0.592851000  |
| C  | -0.668803000 | 0.030881000  | 4.039980000  | C | -1.778942000 | -5.569592000 | -0.175639000 |
| H  | -1.377434000 | 0.064858000  | 4.849562000  | H | -2.256206000 | -5.166304000 | -1.062123000 |
| C  | -2.490670000 | 0.118377000  | 2.343214000  | C | -1.976743000 | -6.907075000 | 0.184367000  |
| H  | -3.053823000 | 0.419877000  | 3.231513000  | H | -2.617914000 | -7.538653000 | -0.423135000 |
| H  | -2.635328000 | 0.853422000  | 1.558501000  | C | -1.340738000 | -7.434773000 | 1.315752000  |
| H  | -2.845612000 | -0.855864000 | 2.000549000  | H | -1.494229000 | -8.472869000 | 1.593939000  |
| C  | 2.491225000  | -0.119268000 | 2.319122000  | C | -0.500609000 | -6.616169000 | 2.082018000  |
| H  | 3.064323000  | -0.416901000 | 3.202315000  | H | -0.001605000 | -7.017486000 | 2.958942000  |
| H  | 2.632388000  | -0.854709000 | 1.533971000  | C | -0.303654000 | -5.279077000 | 1.721772000  |
| H  | 2.838559000  | 0.856067000  | 1.972062000  | H | 0.346974000  | -4.640924000 | 2.310912000  |
| N  | 1.078478000  | -0.065767000 | 2.692786000  | C | 4.678804000  | -0.936743000 | -1.345631000 |
| N  | -1.074420000 | 0.059670000  | 2.703393000  | C | 5.200166000  | -0.291361000 | -2.484286000 |
| N  | -1.658593000 | -1.096157000 | -0.290627000 | H | 4.556202000  | 0.375731000  | -3.048248000 |
| N  | 1.080855000  | -1.654805000 | -0.293287000 | C | 6.523690000  | -0.500534000 | -2.885458000 |
| N  | 1.645286000  | 1.103199000  | -0.320624000 | H | 6.904875000  | 0.002033000  | -3.769210000 |
| N  | -1.097487000 | 1.658721000  | -0.262727000 | C | 7.353914000  | -1.358215000 | -2.151992000 |
| C  | -2.924675000 | -0.649117000 | -0.620524000 | H | 8.381151000  | -1.521987000 | -2.462441000 |
| C  | -1.780751000 | -2.435866000 | 0.046540000  | C | 6.851057000  | -1.999580000 | -1.012376000 |
| C  | 0.630565000  | -2.944542000 | -0.060156000 | H | 7.491153000  | -2.656410000 | -0.431097000 |
| C  | 2.404067000  | -1.765347000 | -0.719075000 | C | 5.527560000  | -1.788294000 | -0.611481000 |
| C  | 2.918922000  | 0.653968000  | -0.641322000 | H | 5.142469000  | -2.274267000 | 0.278512000  |
| C  | 1.769750000  | 2.442746000  | 0.030215000  | C | 0.938311000  | 4.736030000  | 0.593105000  |
| C  | -0.644024000 | 2.945459000  | -0.045082000 | C | 1.774107000  | 5.571799000  | -0.172882000 |
| C  | -2.413205000 | 1.766862000  | -0.696351000 | H | 2.250866000  | 5.169359000  | -1.060014000 |
| C  | -3.879666000 | -1.725731000 | -0.434319000 | C | 1.973846000  | 6.908523000  | 0.188700000  |
| H  | -4.942845000 | -1.639316000 | -0.594765000 | H | 2.616767000  | 7.539646000  | -0.417438000 |
| C  | -3.183177000 | -2.811618000 | 0.019324000  | C | 1.336702000  | 7.436367000  | 1.319339000  |
| H  | -3.573300000 | -3.780321000 | 0.286986000  | H | 1.491365000  | 8.473981000  | 1.598649000  |
| C  | 1.693554000  | -3.888541000 | -0.347031000 | C | 0.493189000  | 6.618645000  | 2.082904000  |
| H  | 1.598691000  | -4.960336000 | -0.269546000 | H | -0.007275000 | 7.020230000  | 2.958858000  |
| C  | 2.767042000  | -3.168887000 | -0.791067000 | C | 0.294323000  | 5.282395000  | 1.721046000  |
| H  | 3.715943000  | -3.546448000 | -1.136575000 | H | -0.359406000 | 4.645228000  | 2.307731000  |
| C  | 3.870947000  | 1.728551000  | -0.443155000 | H | 0.263172000  | -0.905892000 | -2.524605000 |
| H  | 4.935590000  | 1.642578000  | -0.593931000 | H | 0.728956000  | 0.627673000  | -2.495908000 |
| C  | 3.171390000  | 2.812871000  | 0.012795000  |   |              |              |              |
| H  | 3.562736000  | 3.777973000  | 0.291700000  |   |              |              |              |
| C  | -1.705163000 | 3.892840000  | -0.341375000 |   |              |              |              |
| H  | -1.605782000 | 4.964985000  | -0.276040000 |   |              |              |              |
| C  | -2.777162000 | 3.171058000  | -0.780785000 |   |              |              |              |
| H  | -3.723881000 | 3.544871000  | -1.136075000 |   |              |              |              |
| C  | -3.277545000 | 0.682508000  | -0.904482000 |   |              |              |              |
| C  | -0.697238000 | -3.310632000 | 0.224107000  |   |              |              |              |
| C  | 3.272318000  | -0.679774000 | -0.922450000 |   |              |              |              |
| C  | 0.687261000  | 3.314402000  | 0.223495000  |   |              |              |              |
| C  | -4.678387000 | 0.936996000  | -1.345565000 |   |              |              |              |
| C  | -5.176792000 | 0.294542000  | -2.495928000 |   |              |              |              |
| H  | -4.517330000 | -0.362539000 | -3.053120000 |   |              |              |              |
| C  | -6.494257000 | 0.501657000  | -2.917482000 |   |              |              |              |
| H  | -6.858853000 | 0.003267000  | -3.810577000 |   |              |              |              |
| C  | -7.339824000 | 1.352423000  | -2.193236000 |   |              |              |              |
| H  | -8.362506000 | 1.513838000  | -2.519818000 |   |              |              |              |

## Co-based species

 ${}^6_2(\text{HS})$ 

|    |              |              |              |   |              |              |              |
|----|--------------|--------------|--------------|---|--------------|--------------|--------------|
| Co | -0.027279000 | 0.016008000  | -0.254893000 | H | 8.594487000  | -1.574138000 | -1.753697000 |
| O  | 0.066798000  | 0.080659000  | -2.175445000 | C | 6.932324000  | -2.004799000 | -0.441165000 |
| C  | 0.023608000  | -0.018940000 | 2.021024000  | H | 7.511115000  | -2.645862000 | 0.216867000  |
| C  | -0.652295000 | -0.129947000 | 4.219761000  | C | 5.577751000  | -1.779051000 | -0.175216000 |
| H  | -1.362685000 | -0.184633000 | 5.026886000  | H | 5.105405000  | -2.240327000 | 0.685782000  |
| C  | 0.707361000  | -0.096148000 | 4.218239000  | C | 0.949570000  | 4.827603000  | 0.188548000  |
| H  | 1.421300000  | -0.108989000 | 5.023967000  | C | 1.754279000  | 5.549003000  | -0.715222000 |
| C  | 2.502102000  | 0.030579000  | 2.466285000  | H | 2.175759000  | 5.032474000  | -1.570771000 |
| H  | 3.128262000  | -0.148220000 | 3.344695000  | C | 1.993086000  | 6.914212000  | -0.525929000 |
| H  | 2.690121000  | -0.737235000 | 1.719637000  | H | 2.609616000  | 7.456270000  | -1.236435000 |
| H  | 2.737168000  | 1.008728000  | 2.042735000  | C | 1.428755000  | 7.583813000  | 0.567967000  |
| C  | -2.454209000 | -0.100070000 | 2.470864000  | H | 1.613827000  | 8.643537000  | 0.713741000  |
| H  | -3.074295000 | 0.091022000  | 3.351134000  | C | 0.619525000  | 6.879354000  | 1.469102000  |
| H  | -2.621007000 | 0.677990000  | 1.730297000  | H | 0.177917000  | 7.391151000  | 2.318777000  |
| H  | -2.717129000 | -1.068652000 | 2.040525000  | C | 0.380593000  | 5.514303000  | 1.279335000  |
| N  | -1.049380000 | -0.078626000 | 2.880797000  | H | -0.245627000 | 4.964465000  | 1.974299000  |
| N  | 1.099144000  | -0.029697000 | 2.878277000  | C | -4.819943000 | 0.962520000  | -0.993506000 |
| N  | 1.703373000  | 1.139460000  | -0.394266000 | C | -5.444754000 | 0.374828000  | -2.111462000 |
| N  | -1.186341000 | 1.725942000  | -0.195982000 | H | -4.854984000 | -0.255116000 | -2.768956000 |
| N  | -1.700445000 | -1.129574000 | -0.408259000 | C | -6.798244000 | 0.605720000  | -2.377630000 |
| N  | 1.159929000  | -1.712876000 | -0.252277000 | H | -7.261059000 | 0.150393000  | -3.247795000 |
| C  | 2.988907000  | 0.670140000  | -0.564189000 | C | -7.552889000 | 1.427994000  | -1.530407000 |
| C  | 1.769507000  | 2.498668000  | -0.142135000 | H | -8.603182000 | 1.608053000  | -1.737563000 |
| C  | -0.689419000 | 3.010152000  | -0.132196000 | C | -6.944049000 | 2.016335000  | -0.413973000 |
| C  | -2.522483000 | 1.802767000  | -0.534242000 | H | -7.523659000 | 2.648668000  | 0.251755000  |
| C  | -2.992700000 | -0.654932000 | -0.577435000 | C | -5.590699000 | 1.784187000  | -0.147409000 |
| C  | -1.775434000 | -2.495229000 | -0.170238000 | H | -5.119853000 | 2.232020000  | 0.721518000  |
| C  | 0.676789000  | -2.997630000 | -0.185318000 | C | -0.953967000 | -4.823932000 | 0.156631000  |
| C  | 2.504298000  | -1.784535000 | -0.578396000 | C | -1.758748000 | -5.552849000 | -0.740807000 |
| C  | 3.912425000  | 1.770742000  | -0.378956000 | H | -2.184624000 | -5.042402000 | -1.597896000 |
| H  | 4.987073000  | 1.690639000  | -0.423005000 | C | -1.992195000 | -6.918053000 | -0.543985000 |
| C  | 3.166491000  | 2.886388000  | -0.092435000 | H | -2.609360000 | -7.465760000 | -1.249627000 |
| C  | 3.529047000  | 3.875685000  | 0.136414000  | C | -1.421444000 | -7.580368000 | 0.550929000  |
| H  | -1.773741000 | 3.944804000  | -0.401762000 | H | -1.602049000 | -8.640058000 | 0.702476000  |
| H  | -1.667903000 | 5.017553000  | -0.436246000 | C | -0.611214000 | -6.868584000 | 1.445422000  |
| C  | -2.890801000 | 3.204519000  | -0.669908000 | H | -0.164137000 | -7.374775000 | 2.295629000  |
| H  | -3.864705000 | 3.563811000  | -0.961520000 | C | -0.378296000 | -5.503537000 | 1.248331000  |
| C  | -3.914761000 | -1.758961000 | -0.409256000 | H | 0.248869000  | -4.948275000 | 1.938178000  |
| H  | -4.989232000 | -1.677066000 | -0.453994000 |   |              |              |              |
| C  | -3.172627000 | -2.878833000 | -0.134112000 |   |              |              |              |
| H  | -3.538785000 | -3.870668000 | 0.077421000  |   |              |              |              |
| C  | 1.764390000  | -3.929875000 | -0.452822000 |   |              |              |              |
| H  | 1.662009000  | -5.003036000 | -0.486868000 |   |              |              |              |
| C  | 2.878568000  | -3.185219000 | -0.716811000 |   |              |              |              |
| H  | 3.855054000  | -3.540433000 | -1.004643000 |   |              |              |              |
| C  | 3.368368000  | -0.683304000 | -0.729561000 |   |              |              |              |
| C  | 0.667848000  | 3.375571000  | -0.006838000 |   |              |              |              |
| C  | -3.380671000 | 0.696927000  | -0.711480000 |   |              |              |              |
| C  | -0.678747000 | -3.371633000 | -0.044879000 |   |              |              |              |
| C  | 4.808230000  | -0.946281000 | -1.011401000 |   |              |              |              |
| C  | 5.435406000  | -0.339701000 | -2.117879000 |   |              |              |              |
| H  | 4.846705000  | 0.299953000  | -2.766842000 |   |              |              |              |
| C  | 6.789884000  | -0.564978000 | -2.383814000 |   |              |              |              |
| H  | 7.254591000  | -0.095556000 | -3.245419000 |   |              |              |              |
| C  | 7.543291000  | -1.398929000 | -1.546967000 |   |              |              |              |

<sup>4</sup>2<sub>(IS)</sub>

|    |              |              |              |   |              |              |              |
|----|--------------|--------------|--------------|---|--------------|--------------|--------------|
| Co | -0.000020000 | 0.000369000  | -0.233426000 | C | -5.878715000 | 4.137742000  | -0.850139000 |
| O  | 0.000162000  | 0.000325000  | -1.932304000 | H | -6.269526000 | 4.964894000  | -0.265231000 |
| C  | -0.000154000 | -0.000090000 | 1.882395000  | C | -4.690162000 | 3.512041000  | -0.459802000 |
| C  | 0.636011000  | -0.235035000 | 4.079855000  | H | -4.160327000 | 3.848142000  | 0.425266000  |
| H  | 1.306485000  | -0.479823000 | 4.885254000  | C | -2.469538000 | -4.222602000 | 0.394845000  |
| C  | -0.636980000 | 0.233582000  | 4.079801000  | C | -3.486185000 | -4.669345000 | -0.471850000 |
| H  | -1.307695000 | 0.477913000  | 4.885139000  | H | -3.738775000 | -4.069413000 | -1.339329000 |
| C  | -2.346675000 | 0.860371000  | 2.389482000  | C | -4.148319000 | -5.878368000 | -0.233310000 |
| H  | -2.803601000 | 1.268997000  | 3.295047000  | H | -4.924744000 | -6.210155000 | -0.915886000 |
| H  | -2.262010000 | 1.643564000  | 1.643620000  | C | -3.802014000 | -6.666324000 | 0.872382000  |
| H  | -2.965544000 | 0.048715000  | 2.005098000  | H | -4.315491000 | -7.605015000 | 1.056005000  |
| C  | 2.346323000  | -0.860537000 | 2.389680000  | C | -2.783507000 | -6.239544000 | 1.734525000  |
| H  | 2.803280000  | -1.269092000 | 3.295260000  | H | -2.506105000 | -6.845877000 | 2.591500000  |
| H  | 2.262011000  | -1.643678000 | 1.643725000  | C | -2.121731000 | -5.030668000 | 1.495373000  |
| H  | 2.964958000  | -0.048636000 | 2.005445000  | H | -1.330179000 | -4.698000000 | 2.159077000  |
| N  | 1.010661000  | -0.373782000 | 2.742213000  | C | 4.167557000  | -2.432773000 | -1.199320000 |
| N  | -1.011207000 | 0.373157000  | 2.742131000  | C | 4.872388000  | -1.993408000 | -2.337729000 |
| N  | -1.928535000 | -0.499385000 | -0.273370000 | H | 4.471952000  | -1.164672000 | -2.911900000 |
| N  | 0.547707000  | -2.029264000 | -0.152352000 | C | 6.061160000  | -2.618388000 | -2.727720000 |
| N  | 1.928717000  | 0.499232000  | -0.273108000 | H | 6.586835000  | -2.271150000 | -3.611912000 |
| N  | -0.547659000 | 2.029384000  | -0.152024000 | C | 6.568716000  | -3.693373000 | -1.985746000 |
| C  | -2.978159000 | 0.355490000  | -0.559061000 | H | 7.491157000  | -4.178881000 | -2.288837000 |
| C  | -2.453027000 | -1.753340000 | 0.000161000  | C | 5.879062000  | -4.137537000 | -0.849928000 |
| C  | -0.332836000 | -3.074224000 | -0.045259000 | H | 6.269984000  | -4.964534000 | -0.264877000 |
| C  | 1.758105000  | -2.532735000 | -0.578884000 | C | 4.690470000  | -3.511872000 | -0.459653000 |
| C  | 2.978337000  | -0.355563000 | -0.558914000 | H | 4.160723000  | -3.847840000 | 0.425516000  |
| C  | 2.453160000  | 1.753247000  | 0.000436000  | C | 2.469620000  | 4.222604000  | 0.395048000  |
| C  | 0.332930000  | 3.074291000  | -0.044931000 | C | 3.485691000  | 4.669813000  | -0.472091000 |
| C  | -1.758059000 | 2.532807000  | -0.578608000 | H | 3.737904000  | 4.070200000  | -1.339896000 |
| C  | -4.219884000 | -0.377796000 | -0.402653000 | C | 4.147694000  | 5.878916000  | -0.233595000 |
| H  | -5.203147000 | 0.046565000  | -0.528722000 | H | 4.923665000  | 6.211056000  | -0.916514000 |
| C  | -3.901582000 | -1.653928000 | -0.024846000 | C | 3.801812000  | 6.666515000  | 0.872482000  |
| H  | -4.581252000 | -2.458825000 | 0.202969000  | H | 4.315180000  | 7.605274000  | 1.056068000  |
| C  | 0.360588000  | -4.313217000 | -0.375162000 | C | 2.783831000  | 6.239314000  | 1.735035000  |
| H  | -0.094948000 | -5.291121000 | -0.387824000 | H | 2.506738000  | 6.845381000  | 2.592298000  |
| C  | 1.637558000  | -3.976142000 | -0.732069000 | C | 2.122182000  | 5.030360000  | 1.495922000  |
| H  | 2.416717000  | -4.631596000 | -1.087672000 | H | 1.331031000  | 4.697375000  | 2.159943000  |
| C  | 4.220049000  | 0.377695000  | -0.402279000 |   |              |              |              |
| H  | 5.203318000  | -0.046678000 | -0.528250000 |   |              |              |              |
| C  | 3.901725000  | 1.653780000  | -0.024349000 |   |              |              |              |
| H  | 4.581404000  | 2.458600000  | 0.203687000  |   |              |              |              |
| C  | -0.360514000 | 4.313273000  | -0.374816000 |   |              |              |              |
| H  | 0.094995000  | 5.291189000  | -0.387457000 |   |              |              |              |
| C  | -1.637526000 | 3.976217000  | -0.731647000 |   |              |              |              |
| H  | -2.416706000 | 4.631703000  | -1.087152000 |   |              |              |              |
| C  | -2.909159000 | 1.749708000  | -0.787176000 |   |              |              |              |
| C  | -1.725187000 | -2.953012000 | 0.149863000  |   |              |              |              |
| C  | 2.909301000  | -1.749726000 | -0.787260000 |   |              |              |              |
| C  | 1.725308000  | 2.952965000  | 0.150105000  |   |              |              |              |
| C  | -4.167393000 | 2.432752000  | -1.199287000 |   |              |              |              |
| C  | -4.872304000 | 1.993246000  | -2.337591000 |   |              |              |              |
| H  | -4.471965000 | 1.164367000  | -2.911624000 |   |              |              |              |
| C  | -6.061037000 | 2.618261000  | -2.727642000 |   |              |              |              |
| H  | -6.586783000 | 2.270905000  | -3.611746000 |   |              |              |              |
| C  | -6.568463000 | 3.693428000  | -1.985842000 |   |              |              |              |
| H  | -7.490872000 | 4.178965000  | -2.288982000 |   |              |              |              |

<sup>2</sup><sub>2(LS)</sub>

|    |              |              |              |   |              |              |              |
|----|--------------|--------------|--------------|---|--------------|--------------|--------------|
| Co | -0.000014000 | -0.000037000 | -0.245467000 | C | 6.543535000  | -2.673443000 | -1.413530000 |
| O  | -0.000102000 | -0.000326000 | -2.100013000 | H | 7.160422000  | -3.400142000 | -0.893560000 |
| C  | 0.000087000  | 0.000263000  | 1.813073000  | C | 5.281145000  | -2.345897000 | -0.907376000 |
| C  | -0.667592000 | 0.123212000  | 4.009378000  | H | 4.922269000  | -2.809659000 | 0.005260000  |
| H  | -1.369549000 | 0.248199000  | 4.815758000  | C | 1.418230000  | 4.531797000  | 0.798012000  |
| C  | 0.667953000  | -0.122218000 | 4.009347000  | C | 2.343702000  | 5.319469000  | 0.085890000  |
| H  | 1.369980000  | -0.247029000 | 4.815694000  | H | 2.782686000  | 4.924484000  | -0.823530000 |
| C  | 2.456647000  | -0.429331000 | 2.293403000  | C | 2.673716000  | 6.605555000  | 0.526602000  |
| H  | 2.982839000  | -0.817820000 | 3.169913000  | H | 3.383783000  | 7.201784000  | -0.038272000 |
| H  | 2.499109000  | -1.159422000 | 1.491768000  | C | 2.079539000  | 7.130189000  | 1.681962000  |
| H  | 2.929080000  | 0.498826000  | 1.965195000  | H | 2.335739000  | 8.128757000  | 2.022051000  |
| C  | -2.456430000 | 0.429956000  | 2.293519000  | C | 1.145907000  | 6.362273000  | 2.390210000  |
| H  | -2.982531000 | 0.818710000  | 3.169968000  | H | 0.676776000  | 6.763277000  | 3.283534000  |
| H  | -2.498945000 | 1.159822000  | 1.491682000  | C | 0.816286000  | 5.076406000  | 1.949730000  |
| H  | -2.928916000 | -0.498282000 | 1.965618000  | H | 0.093098000  | 4.477352000  | 2.493805000  |
| N  | -1.059561000 | 0.197309000  | 2.670184000  | C | -4.467138000 | 1.401248000  | -1.562521000 |
| N  | 1.059807000  | -0.196608000 | 2.670136000  | C | -4.957122000 | 0.781560000  | -2.729198000 |
| N  | 1.732708000  | 0.900754000  | -0.312668000 | H | -4.332287000 | 0.052454000  | -3.234106000 |
| N  | -0.901082000 | 1.740910000  | -0.271177000 | C | -6.219306000 | 1.109027000  | -3.234844000 |
| N  | -1.732741000 | -0.900853000 | -0.312225000 | H | -6.577727000 | 0.628461000  | -4.139931000 |
| N  | 0.901051000  | -1.740990000 | -0.270714000 | C | -7.016231000 | 2.057627000  | -2.580210000 |
| C  | 2.925585000  | 0.334828000  | -0.708320000 | H | -7.995696000 | 2.312341000  | -2.972960000 |
| C  | 2.003665000  | 2.193764000  | 0.098977000  | C | -6.543611000 | 2.673112000  | -1.413742000 |
| C  | -0.325390000 | 2.955841000  | 0.026023000  | H | -7.160399000 | 3.400035000  | -0.893969000 |
| C  | -2.165076000 | 1.997726000  | -0.778196000 | C | -5.281169000 | 2.345702000  | -0.907628000 |
| C  | -2.925658000 | -0.335054000 | -0.707944000 | H | -4.922150000 | 2.809799000  | 0.004782000  |
| C  | -2.003661000 | -2.193726000 | 0.099869000  | C | -1.418146000 | -4.531515000 | 0.799667000  |
| C  | 0.325388000  | -2.955821000 | 0.026955000  | C | -2.343671000 | -5.319451000 | 0.087909000  |
| C  | 2.164993000  | -1.997973000 | -0.777775000 | H | -2.782743000 | -4.924795000 | -0.821612000 |
| C  | 3.994610000  | 1.289144000  | -0.498197000 | C | -2.673628000 | -6.605385000 | 0.529110000  |
| H  | 5.035790000  | 1.095384000  | -0.702339000 | H | -3.383737000 | -7.201826000 | -0.035487000 |
| C  | 3.435481000  | 2.413795000  | 0.045737000  | C | -2.079341000 | -7.129597000 | 1.684604000  |
| H  | 3.936320000  | 3.316354000  | 0.356117000  | H | -2.335498000 | -8.128046000 | 2.025074000  |
| C  | -1.262555000 | 4.018492000  | -0.283328000 | C | -1.145656000 | -6.361416000 | 2.392495000  |
| H  | -1.055017000 | 5.070090000  | -0.163032000 | H | -0.676440000 | -6.762094000 | 3.285920000  |
| C  | -2.373064000 | 3.431716000  | -0.822501000 | C | -0.816090000 | -5.075702000 | 1.951525000  |
| H  | -3.251598000 | 3.916134000  | -1.216568000 | H | -0.092861000 | -4.476442000 | 2.495317000  |
| C  | -3.994662000 | -1.289307000 | -0.497429000 |   |              |              |              |
| H  | -5.035859000 | -1.095617000 | -0.701548000 |   |              |              |              |
| C  | -3.435481000 | -2.413777000 | 0.046826000  |   |              |              |              |
| H  | -3.936289000 | -3.316239000 | 0.357540000  |   |              |              |              |
| C  | 1.262518000  | -4.018575000 | -0.282142000 |   |              |              |              |
| H  | 1.054988000  | -5.070133000 | -0.161475000 |   |              |              |              |
| C  | 2.372959000  | -3.431982000 | -0.821653000 |   |              |              |              |
| H  | 3.251437000  | -3.916536000 | -1.215675000 |   |              |              |              |
| C  | 3.128953000  | -1.016001000 | -1.037761000 |   |              |              |              |
| C  | 1.026485000  | 3.168565000  | 0.347147000  |   |              |              |              |
| C  | -3.129055000 | 1.015671000  | -1.037783000 |   |              |              |              |
| C  | -1.026454000 | -3.168439000 | 0.348282000  |   |              |              |              |
| C  | 4.466985000  | -1.401726000 | -1.562520000 |   |              |              |              |
| C  | 4.956798000  | -0.782452000 | -2.729489000 |   |              |              |              |
| H  | 4.331869000  | -0.053563000 | -3.234593000 |   |              |              |              |
| C  | 6.218930000  | -1.110055000 | -3.235175000 |   |              |              |              |
| H  | 6.577214000  | -0.629813000 | -4.140489000 |   |              |              |              |
| C  | 7.015979000  | -2.058376000 | -2.580290000 |   |              |              |              |
| H  | 7.995405000  | -2.313196000 | -2.973070000 |   |              |              |              |

<sup>6</sup>RC<sub>(HS)</sub>

|    |              |              |              |   |              |              |              |
|----|--------------|--------------|--------------|---|--------------|--------------|--------------|
| Co | 0.107883000  | 0.336327000  | 0.869087000  | C | 5.534515000  | -4.386524000 | 1.546421000  |
| O  | -0.080716000 | -0.054482000 | -1.007506000 | H | 5.916826000  | -4.936519000 | 2.400953000  |
| C  | 0.185340000  | 0.968521000  | 3.181891000  | C | 4.456419000  | -3.510349000 | 1.710811000  |
| C  | -0.300998000 | 1.839786000  | 5.263956000  | H | 4.007336000  | -3.382274000 | 2.690831000  |
| H  | -0.893067000 | 2.354288000  | 6.001044000  | C | 3.107107000  | 4.205549000  | -0.005348000 |
| C  | 0.920085000  | 1.250581000  | 5.352899000  | C | 3.975639000  | 4.280338000  | -1.112025000 |
| H  | 1.602499000  | 1.159527000  | 6.180311000  | H | 3.981273000  | 3.472251000  | -1.836166000 |
| C  | 2.452009000  | 0.027474000  | 3.786727000  | C | 4.809386000  | 5.388763000  | -1.293484000 |
| H  | 2.932436000  | -0.246983000 | 4.728647000  | H | 5.466925000  | 5.431157000  | -2.156308000 |
| H  | 2.239630000  | -0.872996000 | 3.215894000  | C | 4.789903000  | 6.444009000  | -0.373721000 |
| H  | 3.124796000  | 0.666350000  | 3.211115000  | H | 5.437174000  | 7.303811000  | -0.515238000 |
| C  | -2.027985000 | 2.152185000  | 3.470412000  | C | 3.926833000  | 6.385473000  | 0.726811000  |
| H  | -2.430131000 | 2.846800000  | 4.211354000  | H | 3.904840000  | 7.199402000  | 1.445009000  |
| H  | -1.898400000 | 2.670939000  | 2.523791000  | C | 3.091774000  | 5.278063000  | 0.907536000  |
| H  | -2.728378000 | 1.326217000  | 3.333288000  | H | 2.424873000  | 5.233454000  | 1.762769000  |
| N  | -0.731851000 | 1.662802000  | 3.945233000  | C | -3.841906000 | 3.083136000  | -0.486756000 |
| N  | 1.199919000  | 0.725380000  | 4.087284000  | C | -4.609732000 | 2.587874000  | -1.560522000 |
| N  | 2.101875000  | 0.557333000  | 0.538414000  | H | -4.322369000 | 1.651481000  | -2.028145000 |
| N  | -0.193499000 | 2.367902000  | 0.368949000  | C | -5.720097000 | 3.296237000  | -2.030519000 |
| N  | -1.944084000 | 0.077626000  | 0.870190000  | H | -6.294678000 | 2.902584000  | -2.863170000 |
| N  | 0.388879000  | -1.648809000 | 1.375923000  | C | -6.087051000 | 4.509450000  | -1.436061000 |
| C  | 3.043713000  | -0.467234000 | 0.546072000  | H | -6.949364000 | 5.058181000  | -1.801512000 |
| C  | 2.783706000  | 1.759533000  | 0.363598000  | C | -5.335284000 | 5.010540000  | -0.366868000 |
| C  | 0.808184000  | 3.276576000  | 0.112551000  | H | -5.616667000 | 5.947266000  | 0.104498000  |
| C  | -1.391258000 | 2.934072000  | -0.044784000 | C | -4.223179000 | 4.304383000  | 0.103007000  |
| C  | -2.899766000 | 1.007226000  | 0.497906000  | H | -3.648692000 | 4.693223000  | 0.937731000  |
| C  | -2.601092000 | -1.038021000 | 1.366636000  | C | -2.897699000 | -3.362306000 | 2.223832000  |
| C  | -0.619625000 | -2.543958000 | 1.688897000  | C | -3.868700000 | -3.916367000 | 1.366306000  |
| C  | 1.549586000  | -2.374619000 | 1.174467000  | H | -3.960206000 | -3.535654000 | 0.354269000  |
| C  | 4.360471000  | 0.117481000  | 0.403217000  | C | -4.695044000 | -4.957960000 | 1.800617000  |
| H  | 5.286907000  | -0.434405000 | 0.399177000  | H | -5.432689000 | -5.376873000 | 1.123123000  |
| C  | 4.204471000  | 1.476740000  | 0.316897000  | C | -4.566873000 | -5.465651000 | 3.099051000  |
| H  | 4.984155000  | 2.215967000  | 0.228064000  | H | -5.208975000 | -6.273676000 | 3.435248000  |
| C  | 0.219745000  | 4.488938000  | -0.443216000 | C | -3.602970000 | -4.927262000 | 3.959561000  |
| H  | 0.771866000  | 5.362086000  | -0.752449000 | H | -3.497116000 | -5.314216000 | 4.968423000  |
| C  | -1.123012000 | 4.270411000  | -0.559955000 | C | -2.774737000 | -3.887210000 | 3.525114000  |
| H  | -1.859620000 | 4.935965000  | -0.980229000 | H | -2.030110000 | -3.468679000 | 4.194766000  |
| C  | -4.209499000 | 0.470159000  | 0.803588000  | C | -4.017382000 | -2.364636000 | -4.184413000 |
| H  | -5.145337000 | 0.981687000  | 0.644986000  | C | -2.837365000 | -2.875852000 | -3.631974000 |
| C  | -4.025801000 | -0.771280000 | 1.358884000  | C | -1.641570000 | -2.147400000 | -3.694338000 |
| H  | -4.788318000 | -1.438146000 | 1.727683000  | C | -1.628127000 | -0.890290000 | -4.332318000 |
| C  | -0.053305000 | -3.884630000 | 1.740257000  | C | -2.811290000 | -0.387886000 | -4.891428000 |
| H  | -0.608463000 | -4.785020000 | 1.949656000  | C | -4.004765000 | -1.115789000 | -4.815621000 |
| C  | 1.267740000  | -3.783331000 | 1.405815000  | C | -0.351825000 | -2.662785000 | -3.081858000 |
| H  | 1.979567000  | -4.586082000 | 1.298593000  | C | -0.323618000 | -0.115353000 | -4.376884000 |
| C  | 2.794367000  | -1.836894000 | 0.782274000  | C | 0.873782000  | -1.031662000 | -4.555125000 |
| C  | 2.198581000  | 3.031003000  | 0.197954000  | C | 0.860589000  | -2.287591000 | -3.914685000 |
| C  | -2.655346000 | 2.312740000  | 0.004264000  | C | 1.962354000  | -3.143362000 | -4.051384000 |
| C  | -1.997725000 | -2.254192000 | 1.768345000  | H | 1.945690000  | -4.114853000 | -3.564200000 |
| C  | 3.946919000  | -2.780968000 | 0.619145000  | C | 3.076201000  | -2.760948000 | -4.809002000 |
| C  | 4.546382000  | -2.954796000 | -0.643938000 | C | 3.088483000  | -1.514654000 | -5.445721000 |
| H  | 4.150942000  | -2.414315000 | -1.497842000 | C | 1.987816000  | -0.659561000 | -5.319962000 |
| C  | 5.623784000  | -3.831898000 | -0.807149000 | H | -0.237977000 | -2.209853000 | -2.082844000 |
| H  | 6.068595000  | -3.958061000 | -1.789364000 | H | -4.936688000 | -2.940065000 | -4.128774000 |
| C  | 6.122485000  | -4.549535000 | 0.286559000  | H | -2.841946000 | -3.850314000 | -3.150061000 |
| H  | 6.958868000  | -5.229505000 | 0.158410000  | H | -2.795680000 | 0.577114000  | -5.391644000 |



|   |              |              |              |
|---|--------------|--------------|--------------|
| H | -4.913596000 | -0.716211000 | -5.255919000 |
| H | -0.351378000 | 0.640836000  | -5.170037000 |
| H | 3.920820000  | -3.436035000 | -4.911294000 |
| H | 3.944276000  | -1.214067000 | -6.042952000 |
| H | 1.991581000  | 0.305586000  | -5.819957000 |
| H | -0.399588000 | -3.748484000 | -2.938227000 |
| H | -0.210680000 | 0.419596000  | -3.419839000 |

<sup>4</sup>RC<sub>(15)</sub>

|    |              |              |              |
|----|--------------|--------------|--------------|
| Co | 0.007385000  | -0.001464000 | 0.923686000  |
| O  | -0.000876000 | 0.000373000  | -0.797502000 |
| C  | 0.017851000  | -0.004133000 | 3.112337000  |
| C  | -0.550780000 | 0.345979000  | 5.318844000  |
| H  | -1.153642000 | 0.710478000  | 6.132109000  |
| C  | 0.607313000  | -0.359599000 | 5.312508000  |
| H  | 1.217837000  | -0.726100000 | 6.119129000  |
| C  | 2.161979000  | -1.295077000 | 3.610596000  |
| H  | 2.520541000  | -1.818311000 | 4.499888000  |
| H  | 1.939431000  | -2.019916000 | 2.834665000  |
| H  | 2.934327000  | -0.609259000 | 3.260442000  |
| C  | -2.121427000 | 1.285616000  | 3.634015000  |
| H  | -2.471284000 | 1.807089000  | 4.527801000  |
| H  | -1.906265000 | 2.012006000  | 2.857458000  |
| H  | -2.897267000 | 0.600658000  | 3.289955000  |
| N  | -0.898559000 | 0.557029000  | 3.982609000  |
| N  | 0.942420000  | -0.567393000 | 3.972522000  |
| N  | 1.981041000  | 0.186229000  | 0.853737000  |
| N  | -0.206927000 | 2.108595000  | 0.975365000  |
| N  | -1.966863000 | -0.189314000 | 0.872082000  |
| N  | 0.222210000  | -2.111828000 | 0.968615000  |
| C  | 2.881229000  | -0.828358000 | 0.552721000  |
| C  | 2.703696000  | 1.356086000  | 1.064062000  |
| C  | 0.829074000  | 3.006885000  | 1.056020000  |
| C  | -1.334757000 | 2.795445000  | 0.574187000  |
| C  | -2.869877000 | 0.826009000  | 0.582095000  |
| C  | -2.687500000 | -1.359611000 | 1.086730000  |
| C  | -0.812985000 | -3.010297000 | 1.057213000  |
| C  | 1.346063000  | -2.797768000 | 0.554827000  |
| C  | 4.222869000  | -0.283424000 | 0.631928000  |
| H  | 5.127289000  | -0.847872000 | 0.471783000  |
| C  | 4.117161000  | 1.035206000  | 0.977767000  |
| H  | 4.921947000  | 1.733101000  | 1.140988000  |
| C  | 0.324837000  | 4.339657000  | 0.746995000  |
| H  | 0.917981000  | 5.240405000  | 0.725169000  |
| C  | -0.997490000 | 4.204958000  | 0.423681000  |
| H  | -1.673732000 | 4.978364000  | 0.095525000  |
| C  | -4.210712000 | 0.280886000  | 0.672865000  |
| H  | -5.116600000 | 0.845696000  | 0.522607000  |
| C  | -4.101732000 | -1.038515000 | 1.014702000  |
| H  | -4.904934000 | -1.736781000 | 1.184026000  |
| C  | -0.311841000 | -4.342341000 | 0.740138000  |
| H  | -0.905184000 | -5.243035000 | 0.721929000  |
| C  | 1.007253000  | -4.206880000 | 0.404180000  |
| H  | 1.680128000  | -4.979527000 | 0.067433000  |
| C  | 2.601623000  | -2.198155000 | 0.335923000  |
| C  | 2.188885000  | 2.663301000  | 1.208569000  |
| C  | -2.592358000 | 2.196326000  | 0.365977000  |
| C  | -2.171314000 | -2.667117000 | 1.223493000  |

|   |              |              |              |
|---|--------------|--------------|--------------|
| C | 3.732043000  | -3.067364000 | -0.121207000 |
| C | 4.355425000  | -2.823766000 | -1.361513000 |
| H | 3.997890000  | -2.010812000 | -1.985177000 |
| C | 5.409272000  | -3.631704000 | -1.800627000 |
| H | 5.872127000  | -3.432712000 | -2.762240000 |
| C | 5.861502000  | -4.695232000 | -1.010406000 |
| H | 6.679783000  | -5.321084000 | -1.352583000 |
| C | 5.251034000  | -4.947202000 | 0.223741000  |
| H | 5.598306000  | -5.766587000 | 0.845773000  |
| C | 4.196080000  | -4.140889000 | 0.663916000  |
| H | 3.731807000  | -4.335063000 | 1.625700000  |
| C | 3.151460000  | 3.796389000  | 1.401641000  |
| C | 4.106326000  | 4.132292000  | 0.421884000  |
| H | 4.148972000  | 3.555368000  | -0.496071000 |
| C | 4.979921000  | 5.207790000  | 0.613652000  |
| H | 5.705003000  | 5.454923000  | -0.155653000 |
| C | 4.914178000  | 5.969739000  | 1.786317000  |
| H | 5.592557000  | 6.804142000  | 1.934083000  |
| C | 3.964213000  | 5.652369000  | 2.764017000  |
| H | 3.904493000  | 6.238995000  | 3.675660000  |
| C | 3.089190000  | 4.578103000  | 2.571522000  |
| H | 2.353319000  | 4.333139000  | 3.330923000  |
| C | -3.727166000 | 3.066708000  | -0.077970000 |
| C | -4.362034000 | 2.826752000  | -1.313112000 |
| H | -4.010188000 | 2.015845000  | -1.942637000 |
| C | -5.420118000 | 3.635785000  | -1.739883000 |
| H | -5.891869000 | 3.439570000  | -2.697734000 |
| C | -5.865149000 | 4.696777000  | -0.942215000 |
| H | -6.686739000 | 5.323476000  | -1.274782000 |
| C | -5.243184000 | 4.945154000  | 0.286923000  |
| H | -5.584767000 | 5.762592000  | 0.914642000  |
| C | -4.183987000 | 4.137753000  | 0.714737000  |
| H | -3.710686000 | 4.329143000  | 1.672675000  |
| C | -3.131936000 | -3.800679000 | 1.423317000  |
| C | -4.096422000 | -4.134260000 | 0.452223000  |
| H | -4.148133000 | -3.555135000 | -0.463876000 |
| C | -4.968053000 | -5.210267000 | 0.649990000  |
| H | -5.700681000 | -5.455567000 | -0.112723000 |
| C | -4.890707000 | -5.975063000 | 1.820088000  |
| H | -5.567562000 | -6.809864000 | 1.972516000  |
| C | -3.931141000 | -5.660020000 | 2.789128000  |
| H | -3.862408000 | -6.248867000 | 3.698703000  |
| C | -3.058094000 | -4.585244000 | 2.590620000  |
| H | -2.314767000 | -4.342087000 | 3.343307000  |
| C | -3.631338000 | -0.480357000 | -5.119048000 |
| C | -2.522300000 | -1.242040000 | -4.733192000 |
| C | -1.330204000 | -0.622227000 | -4.334496000 |
| C | -1.246827000 | 0.785205000  | -4.332652000 |
| C | -2.357745000 | 1.542522000  | -4.729104000 |

|   |              |              |              |
|---|--------------|--------------|--------------|
| C | -3.548999000 | 0.916714000  | -5.117222000 |
| C | -0.116277000 | -1.418209000 | -3.889613000 |
| C | 0.052653000  | 1.431316000  | -3.886773000 |
| C | 1.263050000  | 0.636424000  | -4.343063000 |
| C | 1.179679000  | -0.770988000 | -4.343941000 |
| C | 2.287557000  | -1.527355000 | -4.750544000 |
| H | 2.217202000  | -2.611978000 | -4.760590000 |
| C | 3.475821000  | -0.900617000 | -5.146172000 |
| C | 3.558130000  | 0.496478000  | -5.145370000 |
| C | 2.452070000  | 1.257230000  | -4.749324000 |
| H | -0.113787000 | -1.460393000 | -2.788113000 |
| H | -4.548265000 | -0.973820000 | -5.427155000 |
| H | -2.580481000 | -2.327417000 | -4.742676000 |
| H | -2.287421000 | 2.627165000  | -4.737286000 |
| H | -4.400405000 | 1.515175000  | -5.428004000 |
| H | 0.112403000  | 2.465039000  | -4.246432000 |
| H | 4.324857000  | -1.498319000 | -5.464803000 |
| H | 4.472825000  | 0.990612000  | -5.459001000 |
| H | 2.510189000  | 2.342626000  | -4.756605000 |
| H | -0.178891000 | -2.451024000 | -4.251406000 |
| H | 0.059177000  | 1.470680000  | -2.785186000 |

<sup>2</sup>RC<sub>(LS)</sub>

|    |              |              |              |
|----|--------------|--------------|--------------|
| Co | -0.001044000 | -0.001826000 | 0.931527000  |
| O  | 0.000308000  | 0.001158000  | -0.925480000 |
| C  | -0.002580000 | -0.005293000 | 3.038604000  |
| C  | -0.536802000 | 0.410909000  | 5.242307000  |
| H  | -1.096206000 | 0.844269000  | 6.053000000  |
| C  | 0.527837000  | -0.429396000 | 5.241718000  |
| H  | 1.085874000  | -0.865620000 | 6.051816000  |
| C  | 1.975288000  | -1.535821000 | 3.541693000  |
| H  | 2.237835000  | -2.136502000 | 4.415594000  |
| H  | 1.693533000  | -2.195098000 | 2.727351000  |
| H  | 2.837888000  | -0.937259000 | 3.243752000  |
| C  | -1.981331000 | 1.523397000  | 3.543790000  |
| H  | -2.244245000 | 2.122276000  | 4.418821000  |
| H  | -1.698757000 | 2.184330000  | 2.731108000  |
| H  | -2.843957000 | 0.925806000  | 3.243913000  |
| N  | -0.849220000 | 0.663432000  | 3.903468000  |
| N  | 0.842605000  | -0.677080000 | 3.902525000  |
| N  | 1.960410000  | 0.023628000  | 0.841277000  |
| N  | -0.021716000 | 1.971165000  | 0.896313000  |
| N  | -1.962378000 | -0.026968000 | 0.838341000  |
| N  | 0.019677000  | -1.974682000 | 0.890041000  |
| C  | 2.771770000  | -1.022258000 | 0.437910000  |
| C  | 2.791488000  | 1.077589000  | 1.189744000  |
| C  | 1.049421000  | 2.803401000  | 1.156767000  |
| C  | -1.048426000 | 2.768663000  | 0.408765000  |
| C  | -2.773145000 | 1.020195000  | 0.437121000  |
| C  | -2.793968000 | -1.082035000 | 1.182219000  |
| C  | -1.051845000 | -2.807738000 | 1.146238000  |
| C  | 1.047085000  | -2.770604000 | 0.401391000  |
| C  | 4.158179000  | -0.624933000 | 0.574703000  |
| H  | 5.004053000  | -1.252807000 | 0.344952000  |
| C  | 4.171265000  | 0.644990000  | 1.081612000  |
| H  | 5.031789000  | 1.244982000  | 1.329066000  |
| C  | 0.674661000  | 4.173341000  | 0.860203000  |
| H  | 1.326983000  | 5.025932000  | 0.962065000  |

|   |              |              |              |
|---|--------------|--------------|--------------|
| C | -0.595208000 | 4.145250000  | 0.357920000  |
| H | -1.174764000 | 4.974671000  | -0.013618000 |
| C | -4.159756000 | 0.622436000  | 0.570578000  |
| H | -5.005288000 | 1.251039000  | 0.341557000  |
| C | -4.173585000 | -0.649074000 | 1.073470000  |
| H | -5.034471000 | -1.249836000 | 1.317771000  |
| C | -0.676665000 | -4.176717000 | 0.845781000  |
| H | -1.329142000 | -5.029625000 | 0.943928000  |
| C | 0.593922000  | -4.147007000 | 0.345406000  |
| H | 1.173997000  | -4.975219000 | -0.028008000 |
| C | 2.349352000  | -2.327075000 | 0.132072000  |
| C | 2.365518000  | 2.392661000  | 1.430480000  |
| C | -2.350286000 | 2.325986000  | 0.136086000  |
| C | -2.368352000 | -2.397877000 | 1.419331000  |
| C | 3.363353000  | -3.282883000 | -0.411717000 |
| C | 3.951894000  | -3.033610000 | -1.667389000 |
| H | 3.642975000  | -2.162868000 | -2.236265000 |
| C | 4.908652000  | -3.908994000 | -2.191593000 |
| H | 5.345069000  | -3.703973000 | -3.164162000 |
| C | 5.298011000  | -5.044438000 | -1.471348000 |
| H | 6.041011000  | -5.722518000 | -1.879426000 |
| C | 4.724352000  | -5.299628000 | -0.220234000 |
| H | 5.026328000  | -6.173361000 | 0.349236000  |
| C | 3.766449000  | -4.426188000 | 0.305465000  |
| H | 3.335238000  | -4.621832000 | 1.282178000  |
| C | 3.359181000  | 3.440624000  | 1.821416000  |
| C | 4.429567000  | 3.801161000  | 0.979470000  |
| H | 4.534727000  | 3.313136000  | 0.016227000  |
| C | 5.336946000  | 4.794338000  | 1.362928000  |
| H | 6.151828000  | 5.063102000  | 0.697896000  |
| C | 5.189994000  | 5.448148000  | 2.592020000  |
| H | 5.894707000  | 6.218772000  | 2.888146000  |
| C | 4.124688000  | 5.106808000  | 3.433305000  |
| H | 4.001091000  | 5.610877000  | 4.386911000  |
| C | 3.216343000  | 4.114779000  | 3.049865000  |

|   |              |              |              |
|---|--------------|--------------|--------------|
| H | 2.391491000  | 3.849911000  | 3.703891000  |
| C | -3.363471000 | 3.283534000  | -0.406164000 |
| C | -3.949926000 | 3.038443000  | -1.663632000 |
| H | -3.639981000 | 2.169662000  | -2.234943000 |
| C | -4.905884000 | 3.915525000  | -2.186458000 |
| H | -5.340681000 | 3.713760000  | -3.160433000 |
| C | -5.296511000 | 5.048512000  | -1.463035000 |
| H | -6.038888000 | 5.727911000  | -1.870054000 |
| C | -4.724928000 | 5.299533000  | -0.210130000 |
| H | -5.027898000 | 6.171326000  | 0.361779000  |
| C | -3.767826000 | 4.424391000  | 0.314199000  |
| H | -3.338228000 | 4.616771000  | 1.292270000  |
| C | -3.362606000 | -3.447120000 | 1.805314000  |
| C | -4.431742000 | -3.804832000 | 0.960577000  |
| H | -4.535465000 | -3.313591000 | -0.001186000 |
| C | -5.339687000 | -4.799285000 | 1.339357000  |
| H | -6.153576000 | -5.065819000 | 0.672215000  |
| C | -5.194558000 | -5.457211000 | 2.566467000  |
| H | -5.899707000 | -6.228822000 | 2.858961000  |
| C | -4.130501000 | -5.118697000 | 3.410471000  |
| H | -4.008318000 | -5.625962000 | 4.362562000  |
| C | -3.221592000 | -4.125389000 | 3.031707000  |
| H | -2.397708000 | -3.862724000 | 3.687839000  |
| C | -3.559308000 | -0.476589000 | -5.276766000 |
| C | -2.466941000 | -1.239788000 | -4.846158000 |
| C | -1.288361000 | -0.620279000 | -4.411044000 |
| C | -1.201479000 | 0.787805000  | -4.413388000 |
| C | -2.293411000 | 1.546011000  | -4.856179000 |
| C | -3.471980000 | 0.919872000  | -5.283745000 |
| C | -0.080645000 | -1.403612000 | -3.928337000 |
| C | 0.089095000  | 1.418369000  | -3.921900000 |
| C | 1.297856000  | 0.637191000  | -4.405500000 |
| C | 1.210990000  | -0.770872000 | -4.414251000 |
| C | 2.303882000  | -1.527114000 | -4.858033000 |
| H | 2.229138000  | -2.611420000 | -4.877584000 |
| C | 3.483365000  | -0.899089000 | -5.280294000 |
| C | 3.570657000  | 0.497326000  | -5.266962000 |
| C | 2.477353000  | 1.258619000  | -4.835351000 |
| H | -0.073948000 | -1.381026000 | -2.824484000 |
| H | -4.466672000 | -0.969270000 | -5.613486000 |
| H | -2.528268000 | -2.325039000 | -4.850582000 |
| H | -2.218630000 | 2.630391000  | -4.870752000 |
| H | -4.309474000 | 1.517996000  | -5.631431000 |
| H | 0.080014000  | 1.390808000  | -2.818179000 |
| H | 4.321618000  | -1.495669000 | -5.628803000 |
| H | 4.478738000  | 0.991492000  | -5.599549000 |
| H | 2.538672000  | 2.343879000  | -4.834873000 |
| H | -0.144767000 | -2.451889000 | -4.241280000 |
| H | 0.153890000  | 2.468036000  | -4.230006000 |

<sup>6</sup>TS1<sub>(HS)</sub>

|    |              |              |              |
|----|--------------|--------------|--------------|
| Co | -0.723445000 | -0.010873000 | 0.184253000  |
| O  | -0.410236000 | 0.141678000  | -1.676490000 |
| C  | -1.172022000 | -0.070441000 | 2.467614000  |
| C  | -1.640542000 | 0.559524000  | 4.634852000  |
| H  | -1.835498000 | 1.253141000  | 5.434935000  |
| C  | -1.584783000 | -0.798794000 | 4.615106000  |
| H  | -1.714106000 | -1.528839000 | 5.395810000  |

|   |              |              |             |
|---|--------------|--------------|-------------|
| C | -1.161428000 | -2.558207000 | 2.878812000 |
| H | -1.561615000 | -3.196924000 | 3.671427000 |
| H | -1.724550000 | -2.716670000 | 1.962819000 |
| H | -0.112196000 | -2.804544000 | 2.704560000 |
| C | -1.389564000 | 2.397499000  | 2.948338000 |
| H | -1.394684000 | 2.998541000  | 3.862025000 |
| H | -0.496227000 | 2.617997000  | 2.370245000 |

|   |              |              |              |   |              |              |              |
|---|--------------|--------------|--------------|---|--------------|--------------|--------------|
| H | -2.270913000 | 2.633362000  | 2.348744000  | C | -0.281138000 | 5.350706000  | -1.595021000 |
| N | -1.387235000 | 0.984034000  | 3.326996000  | H | -0.756418000 | 4.695330000  | -2.317121000 |
| N | -1.303688000 | -1.162648000 | 3.295090000  | C | -0.050803000 | 6.695550000  | -1.901523000 |
| N | 0.508281000  | -1.654972000 | 0.389363000  | H | -0.353250000 | 7.087640000  | -2.867835000 |
| N | 0.867243000  | 1.229414000  | 0.647421000  | C | 0.573404000  | 7.533356000  | -0.967318000 |
| N | -1.920177000 | 1.630069000  | -0.034968000 | H | 0.754675000  | 8.577009000  | -1.204771000 |
| N | -2.323886000 | -1.259818000 | -0.128022000 | C | 0.956951000  | 7.016709000  | 0.276959000  |
| C | 0.167761000  | -2.952296000 | 0.082030000  | H | 1.429743000  | 7.661898000  | 1.011253000  |
| C | 1.745363000  | -1.667273000 | 1.004692000  | C | 0.723292000  | 5.671747000  | 0.583536000  |
| C | 2.098375000  | 0.814787000  | 1.099677000  | H | 1.010326000  | 5.275593000  | 1.551615000  |
| C | 0.945905000  | 2.574490000  | 0.352411000  | C | -5.586153000 | 0.656386000  | -0.296631000 |
| C | -1.481637000 | 2.936599000  | -0.151590000 | C | -6.165276000 | 1.446984000  | -1.308326000 |
| C | -3.298962000 | 1.629236000  | -0.101619000 | H | -5.517799000 | 1.934000000  | -2.029417000 |
| C | -3.624890000 | -0.846908000 | -0.310863000 | C | -7.554189000 | 1.589514000  | -1.396706000 |
| C | -2.240377000 | -2.591148000 | -0.508690000 | H | -7.983488000 | 2.197575000  | -2.187214000 |
| C | 1.226161000  | -3.832604000 | 0.540293000  | C | -8.389750000 | 0.940195000  | -0.478362000 |
| H | 1.223200000  | -4.906951000 | 0.446931000  | H | -9.467507000 | 1.050546000  | -0.547951000 |
| C | 2.176842000  | -3.048503000 | 1.138911000  | C | -7.826291000 | 0.142383000  | 0.526243000  |
| H | 3.082818000  | -3.379212000 | 1.619210000  | H | -8.466621000 | -0.365939000 | 1.240828000  |
| C | 2.999137000  | 1.957674000  | 1.101638000  | C | -6.437513000 | -0.000026000 | 0.613872000  |
| H | 4.042063000  | 1.922592000  | 1.373724000  | H | -5.996649000 | -0.618617000 | 1.388973000  |
| C | 2.301842000  | 3.027241000  | 0.612367000  | C | 2.557842000  | 3.728738000  | -2.769261000 |
| H | 2.682002000  | 4.011763000  | 0.400038000  | C | 1.936687000  | 2.483683000  | -2.860837000 |
| C | -2.643335000 | 3.805067000  | -0.238331000 | C | 2.619331000  | 1.304369000  | -2.500739000 |
| H | -2.607320000 | 4.881197000  | -0.304882000 | C | 3.936395000  | 1.395015000  | -2.005851000 |
| C | -3.756357000 | 3.008663000  | -0.175988000 | C | 4.560674000  | 2.648892000  | -1.939520000 |
| H | -4.787806000 | 3.323003000  | -0.188291000 | C | 3.884471000  | 3.811185000  | -2.318902000 |
| C | -4.405715000 | -1.967583000 | -0.814262000 | C | 1.940589000  | -0.009854000 | -2.665026000 |
| H | -5.452929000 | -1.923539000 | -1.069248000 | C | 4.666399000  | 0.169448000  | -1.503929000 |
| C | -3.552477000 | -3.026392000 | -0.961221000 | C | 4.068173000  | -1.154003000 | -1.926968000 |
| H | -3.781032000 | -4.002629000 | -1.357932000 | C | 2.752886000  | -1.232066000 | -2.432665000 |
| C | -1.082143000 | -3.388663000 | -0.423425000 | C | 2.218639000  | -2.493929000 | -2.765647000 |
| C | 2.479684000  | -0.518635000 | 1.382478000  | H | 1.198968000  | -2.543749000 | -3.136951000 |
| C | -0.145059000 | 3.377986000  | -0.054446000 | C | 2.973582000  | -3.655902000 | -2.616115000 |
| C | -4.108356000 | 0.477002000  | -0.193901000 | C | 4.290000000  | -3.575099000 | -2.137597000 |
| C | -1.180191000 | -4.824685000 | -0.809248000 | C | 4.827046000  | -2.329335000 | -1.803737000 |
| C | -0.271433000 | -5.362764000 | -1.741658000 | H | 0.946533000  | -0.009563000 | -1.968858000 |
| H | 0.478151000  | -4.708512000 | -2.170783000 | H | 2.013126000  | 4.628791000  | -3.031996000 |
| C | -0.334159000 | -6.710775000 | -2.107359000 | H | 0.907007000  | 2.402262000  | -3.195934000 |
| H | 0.370261000  | -7.106187000 | -2.833136000 | H | 5.583489000  | 2.708634000  | -1.575311000 |
| C | -1.306582000 | -7.548329000 | -1.544762000 | H | 4.380747000  | 4.775099000  | -2.257199000 |
| H | -1.356627000 | -8.595028000 | -1.828293000 | H | 5.722128000  | 0.211953000  | -1.807595000 |
| C | -2.212773000 | -7.026957000 | -0.611862000 | H | 2.549302000  | -4.620533000 | -2.876047000 |
| H | -2.963077000 | -7.671437000 | -0.163864000 | H | 4.890907000  | -4.473339000 | -2.033936000 |
| C | -2.148865000 | -5.678259000 | -0.245956000 | H | 5.850348000  | -2.257363000 | -1.443164000 |
| H | -2.842819000 | -5.276610000 | 0.484759000  | H | 1.406851000  | -0.065101000 | -3.622843000 |
| C | 3.781143000  | -0.694870000 | 2.088660000  | H | 4.674131000  | 0.205278000  | -0.401670000 |
| C | 4.803337000  | -1.526951000 | 1.590254000  |   |              |              |              |
| H | 4.644486000  | -2.053050000 | 0.657757000  |   |              |              |              |
| C | 6.017448000  | -1.656971000 | 2.272667000  |   |              |              |              |
| H | 6.794801000  | -2.297550000 | 1.866634000  |   |              |              |              |
| C | 6.236411000  | -0.958473000 | 3.466920000  |   |              |              |              |
| H | 7.179012000  | -1.060454000 | 3.995754000  |   |              |              |              |
| C | 5.230280000  | -0.124157000 | 3.972165000  |   |              |              |              |
| H | 5.388768000  | 0.420640000  | 4.897925000  |   |              |              |              |
| C | 4.017061000  | 0.006778000  | 3.289632000  |   |              |              |              |
| H | 3.235867000  | 0.650850000  | 3.679078000  |   |              |              |              |
| C | 0.108743000  | 4.815988000  | -0.350410000 |   |              |              |              |

**<sup>4</sup>TS1<sub>(IS)</sub>**

|    |              |              |              |   |              |              |              |
|----|--------------|--------------|--------------|---|--------------|--------------|--------------|
| Co | -0.694101000 | -0.056487000 | 0.291492000  | H | -1.959239000 | -7.893848000 | -0.243526000 |
| C  | -1.166814000 | -0.177579000 | 2.358803000  | C | -1.396588000 | -5.815314000 | -0.311447000 |
| C  | -1.766536000 | 0.366374000  | 4.511648000  | H | -2.134419000 | -5.509165000 | 0.422563000  |
| H  | -2.061107000 | 1.024805000  | 5.310385000  | C | 3.839967000  | -0.214323000 | 2.213836000  |
| C  | -1.553498000 | -0.973368000 | 4.481791000  | C | 4.954478000  | -0.890770000 | 1.679222000  |
| H  | -1.619279000 | -1.724055000 | 5.250182000  | H | 4.854448000  | -1.402272000 | 0.730347000  |
| C  | -0.881102000 | -2.669638000 | 2.789188000  | C | 6.183470000  | -0.884586000 | 2.347231000  |
| H  | -1.209491000 | -3.324729000 | 3.600945000  | H | 7.031587000  | -1.406803000 | 1.914214000  |
| H  | -1.417359000 | -2.923244000 | 1.880768000  | C | 6.326500000  | -0.198978000 | 3.560353000  |
| H  | 0.190807000  | -2.795901000 | 2.631815000  | H | 7.281160000  | -0.194538000 | 4.077238000  |
| C  | -1.675138000 | 2.258754000  | 2.898354000  | C | 5.229075000  | 0.485975000  | 4.098786000  |
| H  | -1.737415000 | 2.810128000  | 3.840761000  | H | 5.329186000  | 1.022137000  | 5.037680000  |
| H  | -0.808216000 | 2.595495000  | 2.339773000  | C | 4.000515000  | 0.479767000  | 3.430974000  |
| H  | -2.579634000 | 2.432919000  | 2.313523000  | H | 3.149712000  | 1.011639000  | 3.843792000  |
| N  | -1.528358000 | 0.837034000  | 3.218455000  | C | -0.406023000 | 4.775874000  | -0.437169000 |
| N  | -1.191653000 | -1.290367000 | 3.170756000  | C | -0.873211000 | 5.187757000  | -1.701749000 |
| N  | 0.678363000  | -1.479935000 | 0.456431000  | H | -1.270324000 | 4.438400000  | -2.377758000 |
| N  | 0.748828000  | 1.384693000  | 0.789680000  | C | -0.815437000 | 6.530936000  | -2.085237000 |
| N  | -2.035254000 | 1.372907000  | 0.036732000  | H | -1.175885000 | 6.827420000  | -3.065656000 |
| N  | -2.159797000 | -1.518496000 | -0.068370000 | C | -0.287899000 | 7.490729000  | -1.210663000 |
| C  | 0.522786000  | -2.800355000 | 0.062623000  | H | -0.240511000 | 8.533730000  | -1.507999000 |
| C  | 1.911151000  | -1.362810000 | 1.086610000  | C | 0.172907000  | 7.096057000  | 0.051918000  |
| C  | 2.009588000  | 1.124167000  | 1.250461000  | H | 0.571489000  | 7.834861000  | 0.740673000  |
| C  | 0.692479000  | 2.708957000  | 0.414459000  | C | 0.110396000  | 5.752178000  | 0.436320000  |
| C  | -1.742419000 | 2.713559000  | -0.138860000 | H | 0.454089000  | 5.449911000  | 1.419626000  |
| C  | -3.410165000 | 1.218153000  | -0.018420000 | C | -5.599447000 | 0.019749000  | -0.195609000 |
| C  | -3.495322000 | -1.264584000 | -0.247010000 | C | -6.272779000 | 0.745115000  | -1.197994000 |
| C  | -1.905458000 | -2.794219000 | -0.518124000 | H | -5.691547000 | 1.307263000  | -1.920646000 |
| C  | 1.692902000  | -3.544554000 | 0.485065000  | C | -7.669302000 | 0.725597000  | -1.278053000 |
| H  | 1.839116000  | -4.600419000 | 0.325947000  | H | -8.171059000 | 1.285436000  | -2.061467000 |
| C  | 2.519311000  | -2.679244000 | 1.144666000  | C | -8.418335000 | -0.024866000 | -0.362068000 |
| H  | 3.460062000  | -2.910270000 | 1.615061000  | H | -9.501979000 | -0.040208000 | -0.425671000 |
| C  | 2.791196000  | 2.353233000  | 1.208377000  | C | -7.759926000 | -0.762007000 | 0.630912000  |
| H  | 3.829346000  | 2.435594000  | 1.490013000  | H | -8.332313000 | -1.349933000 | 1.342062000  |
| C  | 1.992726000  | 3.317231000  | 0.656728000  | C | -6.363529000 | -0.742182000 | 0.710311000  |
| H  | 2.268366000  | 4.324133000  | 0.391902000  | H | -5.848898000 | -1.314983000 | 1.475045000  |
| C  | -2.993223000 | 3.442431000  | -0.239953000 | O | -0.378668000 | 0.170054000  | -1.433962000 |
| H  | -3.072801000 | 4.512809000  | -0.343546000 | C | 1.900235000  | 3.778083000  | -3.049313000 |
| C  | -4.011531000 | 2.535437000  | -0.126687000 | C | 1.468683000  | 2.452100000  | -3.073272000 |
| H  | -5.070756000 | 2.734543000  | -0.131714000 | C | 2.293356000  | 1.413462000  | -2.595971000 |
| C  | -4.133504000 | -2.450066000 | -0.804779000 | C | 3.559151000  | 1.731431000  | -2.059423000 |
| H  | -5.178235000 | -2.525822000 | -1.063709000 | C | 3.990459000  | 3.065069000  | -2.056912000 |
| C  | -3.150085000 | -3.381608000 | -0.997150000 | C | 3.173541000  | 4.087105000  | -2.547425000 |
| H  | -3.247655000 | -4.360011000 | -1.440425000 | C | 1.817360000  | 0.008164000  | -2.656693000 |
| C  | -0.640106000 | -3.410838000 | -0.462833000 | C | 4.429645000  | 0.656748000  | -1.446454000 |
| C  | 2.521498000  | -0.165097000 | 1.518977000  | C | 4.091384000  | -0.752477000 | -1.878883000 |
| C  | -0.475019000 | 3.338337000  | -0.056440000 | C | 2.821273000  | -1.055151000 | -2.419130000 |
| C  | -4.110683000 | -0.003960000 | -0.103274000 | C | 2.535760000  | -2.384604000 | -2.786807000 |
| C  | -0.542709000 | -4.842358000 | -0.868927000 | H | 1.558011000  | -2.605606000 | -3.205392000 |
| C  | 0.422042000  | -5.258129000 | -1.806599000 | C | 3.480199000  | -3.397843000 | -2.624979000 |
| H  | 1.087134000  | -4.517133000 | -2.228997000 | C | 4.744476000  | -3.093688000 | -2.100844000 |
| C  | 0.525424000  | -6.600901000 | -2.182744000 | C | 5.042214000  | -1.775657000 | -1.741923000 |
| H  | 1.272246000  | -6.899730000 | -2.912419000 | H | 0.847654000  | -0.046348000 | -1.857085000 |
| C  | -0.334196000 | -7.557256000 | -1.626371000 | H | 1.250234000  | 4.569003000  | -3.406113000 |
| H  | -0.255160000 | -8.599795000 | -1.918500000 | H | 0.481670000  | 2.198323000  | -3.447057000 |
| C  | -1.294974000 | -7.158681000 | -0.687780000 | H | 4.972982000  | 3.299307000  | -1.654458000 |

|   |             |              |              |
|---|-------------|--------------|--------------|
| H | 3.519782000 | 5.116198000  | -2.534302000 |
| H | 4.325221000 | 0.717665000  | -0.351277000 |
| H | 3.240983000 | -4.417448000 | -2.911295000 |
| H | 5.492307000 | -3.872363000 | -1.986451000 |
| H | 6.027731000 | -1.526883000 | -1.355534000 |
| H | 1.217922000 | -0.186721000 | -3.554042000 |
| H | 5.488089000 | 0.865363000  | -1.655518000 |

<sup>2</sup>TS1<sub>(LS)</sub>

|    |              |              |              |
|----|--------------|--------------|--------------|
| Co | -0.733785000 | 0.034887000  | 0.220883000  |
| O  | -0.303526000 | 0.113843000  | -1.601196000 |
| C  | -1.269594000 | -0.027908000 | 2.203255000  |
| C  | -1.763067000 | 0.583806000  | 4.363402000  |
| H  | -1.922453000 | 1.271398000  | 5.176021000  |
| C  | -1.837358000 | -0.770435000 | 4.303325000  |
| H  | -2.066979000 | -1.506442000 | 5.054369000  |
| C  | -1.513514000 | -2.531591000 | 2.565782000  |
| H  | -2.049399000 | -3.118313000 | 3.317304000  |
| H  | -2.010850000 | -2.631751000 | 1.606899000  |
| H  | -0.486718000 | -2.893249000 | 2.483433000  |
| C  | -1.277984000 | 2.450193000  | 2.780422000  |
| H  | -1.222439000 | 2.990515000  | 3.729565000  |
| H  | -0.367091000 | 2.618486000  | 2.215175000  |
| H  | -2.134174000 | 2.808675000  | 2.206004000  |
| N  | -1.417803000 | 1.022483000  | 3.082486000  |
| N  | -1.539315000 | -1.128188000 | 2.986053000  |
| N  | 0.343366000  | -1.586204000 | 0.396387000  |
| N  | 0.825548000  | 1.119582000  | 0.671900000  |
| N  | -1.779765000 | 1.660114000  | -0.068903000 |
| N  | -2.295739000 | -1.046577000 | -0.262655000 |
| C  | 0.040161000  | -2.825586000 | -0.129868000 |
| C  | 1.500865000  | -1.724506000 | 1.139856000  |
| C  | 1.946952000  | 0.680298000  | 1.341642000  |
| C  | 1.062808000  | 2.426735000  | 0.278139000  |
| C  | -1.266185000 | 2.911908000  | -0.320904000 |
| C  | -3.157172000 | 1.777691000  | -0.028615000 |
| C  | -3.604465000 | -0.617224000 | -0.292901000 |
| C  | -2.272257000 | -2.326974000 | -0.788495000 |
| C  | 1.030186000  | -3.782560000 | 0.316593000  |
| H  | 1.031119000  | -4.828107000 | 0.054431000  |
| C  | 1.898805000  | -3.118646000 | 1.136272000  |
| H  | 2.746506000  | -3.525364000 | 1.661329000  |
| C  | 2.914139000  | 1.757545000  | 1.401237000  |
| H  | 3.895725000  | 1.674009000  | 1.839646000  |
| C  | 2.395109000  | 2.807008000  | 0.698112000  |
| H  | 2.885160000  | 3.728898000  | 0.438846000  |
| C  | -2.355224000 | 3.865303000  | -0.393348000 |
| H  | -2.231226000 | 4.924738000  | -0.552316000 |
| C  | -3.514552000 | 3.176658000  | -0.160652000 |
| H  | -4.517292000 | 3.568982000  | -0.111417000 |
| C  | -4.440546000 | -1.666341000 | -0.842577000 |
| H  | -5.504587000 | -1.581427000 | -0.996994000 |
| C  | -3.615225000 | -2.699574000 | -1.187370000 |
| H  | -3.880632000 | -3.628289000 | -1.665904000 |
| C  | -1.158608000 | -3.176454000 | -0.769559000 |
| C  | 2.225964000  | -0.654225000 | 1.685984000  |
| C  | 0.091392000  | 3.273632000  | -0.272709000 |
| C  | -4.046067000 | 0.693956000  | -0.048071000 |

|   |              |              |              |
|---|--------------|--------------|--------------|
| C | -1.292843000 | -4.566626000 | -1.290773000 |
| C | -0.424388000 | -5.029213000 | -2.296184000 |
| H | 0.318954000  | -4.351218000 | -2.692500000 |
| C | -0.521125000 | -6.338470000 | -2.778894000 |
| H | 0.153391000  | -6.675382000 | -3.560377000 |
| C | -1.487526000 | -7.210523000 | -2.261158000 |
| H | -1.563256000 | -8.226873000 | -2.635000000 |
| C | -2.354985000 | -6.763158000 | -1.255886000 |
| H | -3.101476000 | -7.434846000 | -0.842825000 |
| C | -2.256964000 | -5.453539000 | -0.773623000 |
| H | -2.921172000 | -5.110511000 | 0.012718000  |
| C | 3.422036000  | -0.905394000 | 2.535163000  |
| C | 4.488012000  | -1.723494000 | 2.110836000  |
| H | 4.442940000  | -2.184320000 | 1.131222000  |
| C | 5.607373000  | -1.915172000 | 2.927700000  |
| H | 6.422485000  | -2.543696000 | 2.581600000  |
| C | 5.686347000  | -1.290442000 | 4.179084000  |
| H | 6.556277000  | -1.440343000 | 4.810942000  |
| C | 4.637968000  | -0.465015000 | 4.606733000  |
| H | 4.691461000  | 0.026309000  | 5.573541000  |
| C | 3.518392000  | -0.272926000 | 3.791061000  |
| H | 2.704194000  | 0.366134000  | 4.117280000  |
| C | 0.451381000  | 4.637383000  | -0.740186000 |
| C | 0.070298000  | 5.031261000  | -2.039490000 |
| H | -0.467915000 | 4.322744000  | -2.659934000 |
| C | 0.400334000  | 6.297532000  | -2.530432000 |
| H | 0.106252000  | 6.578627000  | -3.537053000 |
| C | 1.116846000  | 7.197629000  | -1.729719000 |
| H | 1.379244000  | 8.179412000  | -2.111361000 |
| C | 1.483550000  | 6.825598000  | -0.430046000 |
| H | 2.021665000  | 7.523904000  | 0.203762000  |
| C | 1.146955000  | 5.560392000  | 0.062976000  |
| H | 1.412141000  | 5.285760000  | 1.077660000  |
| C | -5.515676000 | 0.923222000  | 0.013678000  |
| C | -6.179507000 | 1.767925000  | -0.897234000 |
| H | -5.604487000 | 2.264228000  | -1.671003000 |
| C | -7.565539000 | 1.944505000  | -0.826620000 |
| H | -8.061861000 | 2.594038000  | -1.541161000 |
| C | -8.313791000 | 1.274293000  | 0.150049000  |
| H | -9.389410000 | 1.411136000  | 0.202795000  |
| C | -7.666971000 | 0.419132000  | 1.051869000  |
| H | -8.240071000 | -0.108363000 | 1.808332000  |
| C | -6.281213000 | 0.243126000  | 0.981529000  |
| H | -5.775876000 | -0.420794000 | 1.675681000  |
| C | 3.063231000  | 3.615228000  | -2.670388000 |
| C | 2.332345000  | 2.432937000  | -2.795938000 |
| C | 2.832267000  | 1.210317000  | -2.306717000 |
| C | 4.084203000  | 1.199568000  | -1.654975000 |
| C | 4.822858000  | 2.386674000  | -1.553130000 |

|   |             |              |              |
|---|-------------|--------------|--------------|
| C | 4.323987000 | 3.591624000  | -2.055951000 |
| C | 2.048642000 | -0.040667000 | -2.495764000 |
| C | 4.608027000 | -0.066272000 | -1.014533000 |
| C | 4.009928000 | -1.339987000 | -1.568670000 |
| C | 2.771462000 | -1.316196000 | -2.248140000 |
| C | 2.244754000 | -2.527058000 | -2.737187000 |
| H | 1.291582000 | -2.497045000 | -3.257144000 |
| C | 2.923397000 | -3.734278000 | -2.565727000 |
| C | 4.155797000 | -3.753483000 | -1.898762000 |
| C | 4.690185000 | -2.557490000 | -1.411154000 |
| H | 0.980082000 | 0.016392000  | -1.841577000 |
| H | 2.650993000 | 4.548859000  | -3.036958000 |
| H | 1.351888000 | 2.440887000  | -3.262432000 |
| H | 5.793629000 | 2.361090000  | -1.063342000 |
| H | 4.906743000 | 4.503821000  | -1.967490000 |
| H | 5.703306000 | -0.103501000 | -1.095737000 |
| H | 2.499955000 | -4.657560000 | -2.949032000 |
| H | 4.697176000 | -4.686103000 | -1.771795000 |
| H | 5.657462000 | -2.556871000 | -0.913424000 |
| H | 1.547244000 | -0.051960000 | -3.471525000 |
| H | 4.390484000 | -0.017775000 | 0.064491000  |

<sup>5</sup>Int1<sub>(HS)</sub>

|    |              |              |              |
|----|--------------|--------------|--------------|
| Co | 0.022155000  | 0.023371000  | -0.399139000 |
| O  | -0.015490000 | -0.008488000 | -2.263870000 |
| C  | -0.037019000 | -0.059921000 | 1.972406000  |
| C  | 0.628426000  | -0.085721000 | 4.180928000  |
| H  | 1.336152000  | -0.079606000 | 4.992185000  |
| C  | -0.729651000 | -0.120694000 | 4.171611000  |
| H  | -1.447654000 | -0.158050000 | 4.972943000  |
| C  | -2.521884000 | -0.129882000 | 2.426462000  |
| H  | -3.136083000 | 0.063116000  | 3.310603000  |
| H  | -2.697905000 | 0.644703000  | 1.685290000  |
| H  | -2.784902000 | -1.101724000 | 2.005123000  |
| C  | 2.442899000  | 0.013545000  | 2.462225000  |
| H  | 3.047672000  | -0.203462000 | 3.347282000  |
| H  | 2.642100000  | -0.727941000 | 1.694261000  |
| H  | 2.695582000  | 1.004694000  | 2.081153000  |
| N  | 1.031782000  | -0.050403000 | 2.842956000  |
| N  | -1.115801000 | -0.101645000 | 2.828265000  |
| N  | -1.665858000 | -1.190378000 | -0.394000000 |
| N  | 1.231086000  | -1.655503000 | -0.261043000 |
| N  | 1.676844000  | 1.200793000  | -0.320456000 |
| N  | -1.210879000 | 1.676655000  | -0.241308000 |
| C  | -2.965014000 | -0.763348000 | -0.572056000 |
| C  | -1.689606000 | -2.546410000 | -0.128690000 |
| C  | 0.784921000  | -2.956953000 | -0.172826000 |
| C  | 2.573713000  | -1.685553000 | -0.586433000 |
| C  | 2.977818000  | 0.779950000  | -0.513591000 |
| C  | 1.698786000  | 2.559828000  | -0.065652000 |
| C  | -0.770053000 | 2.976058000  | -0.142928000 |
| C  | -2.553571000 | 1.706342000  | -0.581041000 |
| C  | -3.854701000 | -1.894885000 | -0.384521000 |
| H  | -4.931142000 | -1.850362000 | -0.436988000 |
| C  | -3.075017000 | -2.982020000 | -0.083786000 |
| H  | -3.406006000 | -3.982220000 | 0.145685000  |
| C  | 1.901796000  | -3.851772000 | -0.438407000 |
| H  | 1.837744000  | -4.928315000 | -0.457617000 |

|   |              |              |              |
|---|--------------|--------------|--------------|
| C | 2.990797000  | -3.072448000 | -0.717356000 |
| H | 3.977795000  | -3.399196000 | -1.003232000 |
| C | 3.864278000  | 1.913887000  | -0.326213000 |
| H | 4.940347000  | 1.873097000  | -0.387179000 |
| C | 3.083547000  | 2.998018000  | -0.022984000 |
| H | 3.411952000  | 4.000001000  | 0.202041000  |
| C | -1.884092000 | 3.872679000  | -0.413324000 |
| H | -1.819477000 | 4.949223000  | -0.426418000 |
| C | -2.969732000 | 3.094942000  | -0.705784000 |
| H | -3.953557000 | 3.423437000  | -1.000328000 |
| C | -3.383525000 | 0.577945000  | -0.741618000 |
| C | -0.553594000 | -3.377290000 | -0.004785000 |
| C | 3.402872000  | -0.551191000 | -0.715559000 |
| C | 0.567129000  | 3.394489000  | 0.042220000  |
| C | -4.830123000 | 0.798056000  | -1.026887000 |
| C | -5.438541000 | 0.171788000  | -2.132793000 |
| H | -4.831257000 | -0.451877000 | -2.780295000 |
| C | -6.799096000 | 0.354699000  | -2.400189000 |
| H | -7.248573000 | -0.130129000 | -3.261379000 |
| C | -7.578362000 | 1.166079000  | -1.564973000 |
| H | -8.634252000 | 1.308877000  | -1.772615000 |
| C | -6.986789000 | 1.791074000  | -0.459281000 |
| H | -7.585341000 | 2.414501000  | 0.198017000  |
| C | -5.626237000 | 1.606957000  | -0.191921000 |
| H | -5.169256000 | 2.082535000  | 0.669502000  |
| C | -0.769543000 | -4.834970000 | 0.228737000  |
| C | -1.562883000 | -5.612316000 | -0.637729000 |
| H | -2.025649000 | -5.136209000 | -1.495429000 |
| C | -1.740594000 | -6.980989000 | -0.409423000 |
| H | -2.349911000 | -7.565837000 | -1.091714000 |
| C | -1.124889000 | -7.598678000 | 0.687221000  |
| H | -1.262420000 | -8.661000000 | 0.863421000  |
| C | -0.326337000 | -6.838356000 | 1.551688000  |
| H | 0.154855000  | -7.309357000 | 2.403468000  |
| C | -0.149064000 | -5.469971000 | 1.322891000  |

|   |              |              |              |
|---|--------------|--------------|--------------|
| H | 0.468226000  | -4.877111000 | 1.989833000  |
| C | 4.848262000  | -0.761999000 | -1.013195000 |
| C | 5.442770000  | -0.120289000 | -2.117734000 |
| H | 4.825531000  | 0.508002000  | -2.751165000 |
| C | 6.801129000  | -0.296541000 | -2.400662000 |
| H | 7.240774000  | 0.200157000  | -3.260166000 |
| C | 7.590743000  | -1.116391000 | -1.583496000 |
| H | 8.644884000  | -1.253785000 | -1.803510000 |
| C | 7.012116000  | -1.757198000 | -0.480021000 |
| H | 7.618912000  | -2.387532000 | 0.163034000  |
| C | 5.653711000  | -1.580026000 | -0.196771000 |
| H | 5.206530000  | -2.068027000 | 0.663001000  |
| C | 0.784052000  | 4.853490000  | 0.267663000  |
| C | 1.573803000  | 5.624037000  | -0.607920000 |
| H | 2.031591000  | 5.140994000  | -1.464394000 |
| C | 1.752021000  | 6.994395000  | -0.390031000 |
| H | 2.358503000  | 7.574427000  | -1.078932000 |
| C | 1.140129000  | 7.619932000  | 0.704342000  |
| H | 1.277997000  | 8.683596000  | 0.872201000  |
| C | 0.344516000  | 6.866069000  | 1.577116000  |
| H | -0.134105000 | 7.343453000  | 2.426830000  |
| C | 0.166691000  | 5.495882000  | 1.358899000  |
| H | -0.448946000 | 4.908102000  | 2.032018000  |
| H | -0.597207000 | -0.676890000 | -2.682676000 |

### <sup>3</sup>Int1<sub>(IS)</sub>

|    |              |              |              |
|----|--------------|--------------|--------------|
| Co | 0.010671000  | 0.000968000  | -0.231534000 |
| O  | 0.107046000  | -0.006081000 | -2.059512000 |
| C  | 0.000462000  | -0.004644000 | 1.906839000  |
| C  | 0.618835000  | -0.246998000 | 4.108885000  |
| H  | 1.278980000  | -0.503778000 | 4.919210000  |
| C  | -0.644982000 | 0.247889000  | 4.100087000  |
| H  | -1.315121000 | 0.508106000  | 4.901070000  |
| C  | -2.328990000 | 0.898064000  | 2.384439000  |
| H  | -2.798165000 | 1.310468000  | 3.281996000  |
| H  | -2.219451000 | 1.681287000  | 1.641141000  |
| H  | -2.951448000 | 0.096015000  | 1.985454000  |
| C  | 2.321162000  | -0.914121000 | 2.418582000  |
| H  | 2.770135000  | -1.336203000 | 3.322015000  |
| H  | 2.216656000  | -1.692348000 | 1.669287000  |
| H  | 2.958353000  | -0.116539000 | 2.033829000  |
| N  | 0.997772000  | -0.396668000 | 2.773174000  |
| N  | -1.007537000 | 0.390648000  | 2.759130000  |
| N  | -1.907326000 | -0.459442000 | -0.316819000 |
| N  | 0.503789000  | -2.048167000 | -0.149635000 |
| N  | 1.920050000  | 0.451318000  | -0.248999000 |
| N  | -0.505098000 | 2.038642000  | -0.156897000 |
| C  | -2.947651000 | 0.421290000  | -0.587011000 |
| C  | -2.468377000 | -1.698178000 | -0.012750000 |
| C  | -0.392617000 | -3.076437000 | -0.036297000 |
| C  | 1.703032000  | -2.576449000 | -0.573058000 |
| C  | 2.950249000  | -0.420804000 | -0.547901000 |
| C  | 2.474502000  | 1.690818000  | 0.026979000  |
| C  | 0.395460000  | 3.064046000  | -0.033882000 |
| C  | -1.696651000 | 2.573853000  | -0.593854000 |
| C  | -4.201535000 | -0.280286000 | -0.410918000 |
| H  | -5.175207000 | 0.168148000  | -0.527178000 |
| C  | -3.910627000 | -1.559712000 | -0.022090000 |

|   |              |              |              |
|---|--------------|--------------|--------------|
| H | -4.607760000 | -2.343718000 | 0.224802000  |
| C | 0.275198000  | -4.330687000 | -0.359624000 |
| H | -0.199073000 | -5.299830000 | -0.366548000 |
| C | 1.557765000  | -4.017994000 | -0.720339000 |
| H | 2.325137000  | -4.688480000 | -1.073593000 |
| C | 4.209261000  | 0.284746000  | -0.395006000 |
| H | 5.181785000  | -0.160533000 | -0.530929000 |
| C | 3.921012000  | 1.562797000  | -0.005160000 |
| H | 4.617556000  | 2.352810000  | 0.223316000  |
| C | -0.263575000 | 4.320407000  | -0.366883000 |
| H | 0.215411000  | 5.287143000  | -0.369796000 |
| C | -1.543226000 | 4.014325000  | -0.741222000 |
| H | -2.302779000 | 4.687998000  | -1.105110000 |
| C | -2.860014000 | 1.814826000  | -0.812368000 |
| C | -1.780492000 | -2.918087000 | 0.154224000  |
| C | 2.863261000  | -1.811540000 | -0.783400000 |
| C | 1.780120000  | 2.909106000  | 0.176077000  |
| C | -4.106920000 | 2.520644000  | -1.219010000 |
| C | -4.830597000 | 2.093286000  | -2.350274000 |
| H | -4.454487000 | 1.253221000  | -2.924539000 |
| C | -6.008490000 | 2.742250000  | -2.733856000 |
| H | -6.548355000 | 2.403027000  | -3.612612000 |
| C | -6.486836000 | 3.830909000  | -1.992463000 |
| H | -7.400665000 | 4.335320000  | -2.290623000 |
| C | -5.779117000 | 4.263467000  | -0.863320000 |
| H | -6.147587000 | 5.100569000  | -0.278109000 |
| C | -4.601815000 | 3.613224000  | -0.479397000 |
| H | -4.059244000 | 3.940178000  | 0.401257000  |
| C | -2.558001000 | -4.162656000 | 0.419981000  |
| C | -3.596350000 | -4.591930000 | -0.429799000 |
| H | -3.843373000 | -3.995479000 | -1.301273000 |
| C | -4.287859000 | -5.779925000 | -0.170071000 |



|   |              |              |              |
|---|--------------|--------------|--------------|
| H | -5.080835000 | -6.098280000 | -0.839911000 |
| C | -3.949791000 | -6.564750000 | 0.940375000  |
| H | -4.486125000 | -7.487123000 | 1.140534000  |
| C | -2.909966000 | -6.156112000 | 1.785706000  |
| H | -2.638728000 | -6.760226000 | 2.646195000  |
| C | -2.219037000 | -4.968206000 | 1.525377000  |
| H | -1.411182000 | -4.649424000 | 2.176045000  |
| C | 4.107329000  | -2.510360000 | -1.210622000 |
| C | 4.802167000  | -2.077938000 | -2.357782000 |
| H | 4.404486000  | -1.242458000 | -2.924004000 |
| C | 5.976397000  | -2.719129000 | -2.765165000 |
| H | 6.495057000  | -2.377301000 | -3.655604000 |
| C | 6.478715000  | -3.802968000 | -2.032395000 |
| H | 7.390108000  | -4.300631000 | -2.348991000 |
| C | 5.798487000  | -4.240108000 | -0.888202000 |
| H | 6.185726000  | -5.073842000 | -0.310269000 |
| C | 4.624191000  | -3.598591000 | -0.480491000 |
| H | 4.101866000  | -3.928920000 | 0.411246000  |
| C | 2.553351000  | 4.159266000  | 0.431323000  |
| C | 3.578590000  | 4.590924000  | -0.432703000 |
| H | 3.817217000  | 3.992461000  | -1.305083000 |
| C | 4.265857000  | 5.784038000  | -0.185074000 |
| H | 5.048741000  | 6.104925000  | -0.865488000 |
| C | 3.936385000  | 6.570522000  | 0.926851000  |
| H | 4.469496000  | 7.496833000  | 1.117378000  |
| C | 2.909300000  | 6.158811000  | 1.786082000  |
| H | 2.644679000  | 6.764495000  | 2.647558000  |
| C | 2.222193000  | 4.965932000  | 1.537780000  |
| H | 1.423503000  | 4.644976000  | 2.198749000  |
| H | -0.759926000 | -0.285655000 | -2.426767000 |

<sup>1</sup>Int1<sub>(LS)</sub>

|    |              |              |              |
|----|--------------|--------------|--------------|
| Co | 0.004315000  | 0.001197000  | -0.237281000 |
| O  | 0.051771000  | 0.069732000  | -2.129214000 |
| C  | -0.006485000 | -0.012088000 | 1.813208000  |
| C  | 0.643355000  | -0.178795000 | 4.011756000  |
| H  | 1.335840000  | -0.335858000 | 4.820661000  |
| C  | -0.682421000 | 0.113695000  | 4.006581000  |
| H  | -1.384559000 | 0.256004000  | 4.809871000  |
| C  | -2.450311000 | 0.496411000  | 2.286521000  |
| H  | -2.965278000 | 0.899432000  | 3.163145000  |
| H  | -2.465201000 | 1.230485000  | 1.487785000  |
| H  | -2.952916000 | -0.414190000 | 1.954206000  |
| C  | 2.432134000  | -0.532036000 | 2.307413000  |
| H  | 2.937027000  | -0.942987000 | 3.186244000  |
| H  | 2.457570000  | -1.258865000 | 1.502175000  |
| H  | 2.938228000  | 0.381512000  | 1.988959000  |
| N  | 1.040887000  | -0.254173000 | 2.674358000  |
| N  | -1.063644000 | 0.214229000  | 2.666182000  |
| N  | -1.756288000 | -0.852564000 | -0.319454000 |
| N  | 0.845461000  | -1.768092000 | -0.276089000 |
| N  | 1.763912000  | 0.845006000  | -0.270248000 |
| N  | -0.845752000 | 1.766046000  | -0.254223000 |
| C  | -2.933313000 | -0.245883000 | -0.707697000 |
| C  | -2.070291000 | -2.136693000 | 0.096146000  |
| C  | 0.235536000  | -2.968273000 | 0.021599000  |
| C  | 2.106726000  | -2.059223000 | -0.773483000 |
| C  | 2.935445000  | 0.249861000  | -0.678237000 |

|   |              |              |              |
|---|--------------|--------------|--------------|
| C | 2.071003000  | 2.128970000  | 0.134932000  |
| C | -0.232417000 | 2.961782000  | 0.037561000  |
| C | -2.093977000 | 2.061064000  | -0.776189000 |
| C | -4.031655000 | -1.164360000 | -0.494233000 |
| H | -5.066802000 | -0.936198000 | -0.693825000 |
| C | -3.508020000 | -2.308262000 | 0.046975000  |
| H | -4.038612000 | -3.193391000 | 0.358421000  |
| C | 1.144607000  | -4.054681000 | -0.284727000 |
| H | 0.908988000  | -5.100499000 | -0.165053000 |
| C | 2.274394000  | -3.497827000 | -0.818000000 |
| H | 3.141862000  | -4.006605000 | -1.205964000 |
| C | 4.034324000  | 1.173687000  | -0.471711000 |
| H | 5.068393000  | 0.951389000  | -0.682877000 |
| C | 3.510022000  | 2.311323000  | 0.077193000  |
| H | 4.036525000  | 3.200087000  | 0.384948000  |
| C | -1.129569000 | 4.054700000  | -0.289578000 |
| H | -0.886382000 | 5.099410000  | -0.176324000 |
| C | -2.253280000 | 3.501886000  | -0.835197000 |
| H | -3.110503000 | 4.012345000  | -1.243093000 |
| C | -3.090330000 | 1.111978000  | -1.036001000 |
| C | -1.122721000 | -3.141425000 | 0.342483000  |
| C | 3.099712000  | -1.102419000 | -1.020304000 |
| C | 1.122174000  | 3.133873000  | 0.371339000  |
| C | -4.416193000 | 1.543321000  | -1.556385000 |
| C | -4.934935000 | 0.940103000  | -2.719216000 |
| H | -4.339851000 | 0.188426000  | -3.226971000 |

|   |              |              |              |
|---|--------------|--------------|--------------|
| C | -6.187455000 | 1.311114000  | -3.218696000 |
| H | -6.567626000 | 0.842317000  | -4.121110000 |
| C | -6.946611000 | 2.288382000  | -2.561431000 |
| H | -7.918533000 | 2.577123000  | -2.949332000 |
| C | -6.445802000 | 2.888349000  | -1.398647000 |
| H | -7.033378000 | 3.637572000  | -0.876715000 |
| C | -5.193077000 | 2.517011000  | -0.898936000 |
| H | -4.812585000 | 2.969714000  | 0.010420000  |
| C | -1.554221000 | -4.491854000 | 0.794847000  |
| C | -2.510444000 | -5.249222000 | 0.090362000  |
| H | -2.944634000 | -4.840046000 | -0.815063000 |
| C | -2.878221000 | -6.524349000 | 0.532977000  |
| H | -3.611915000 | -7.096817000 | -0.026289000 |
| C | -2.291663000 | -7.068945000 | 1.682924000  |
| H | -2.577009000 | -8.059028000 | 2.024589000  |
| C | -1.328004000 | -6.331879000 | 2.383740000  |
| H | -0.864731000 | -6.748401000 | 3.273012000  |
| C | -0.961070000 | -5.056822000 | 1.941530000  |
| H | -0.214890000 | -4.481675000 | 2.480268000  |
| C | 4.424782000  | -1.522693000 | -1.551750000 |
| C | 4.926144000  | -0.910398000 | -2.717551000 |
| H | 4.319443000  | -0.160638000 | -3.214365000 |
| C | 6.176452000  | -1.270177000 | -3.230797000 |
| H | 6.544330000  | -0.794345000 | -4.134618000 |
| C | 6.949662000  | -2.244228000 | -2.585052000 |
| H | 7.919996000  | -2.523689000 | -2.983653000 |
| C | 6.465581000  | -2.852649000 | -1.419585000 |
| H | 7.064528000  | -3.598946000 | -0.906400000 |
| C | 5.215025000  | -2.492982000 | -0.905767000 |
| H | 4.847813000  | -2.951386000 | 0.006291000  |
| C | 1.551376000  | 4.487392000  | 0.817660000  |
| C | 2.500393000  | 5.245556000  | 0.104614000  |
| H | 2.929644000  | 4.834454000  | -0.802239000 |
| C | 2.865011000  | 6.523907000  | 0.540589000  |
| H | 3.592872000  | 7.097572000  | -0.025023000 |
| C | 2.282494000  | 7.070231000  | 1.691839000  |
| H | 2.565514000  | 8.062828000  | 2.028202000  |
| C | 1.325429000  | 6.332167000  | 2.400520000  |
| H | 0.864808000  | 6.750441000  | 3.290375000  |
| C | 0.961103000  | 5.054065000  | 1.964688000  |
| H | 0.219173000  | 4.478428000  | 2.508885000  |
| H | -0.362234000 | -0.765323000 | -2.437877000 |

<sup>6</sup>TS2<sub>(HS)</sub>

|    |             |              |              |   |              |              |              |
|----|-------------|--------------|--------------|---|--------------|--------------|--------------|
| Co | 0.671140000 | -0.047474000 | 0.372505000  | H | 2.161707000  | -2.918889000 | 2.284578000  |
| O  | 0.442028000 | 0.079005000  | -1.707212000 | N | 1.444185000  | -1.257797000 | 3.375542000  |
| C  | 1.244009000 | -0.161037000 | 2.568898000  | N | 1.472149000  | 0.889705000  | 3.429018000  |
| C  | 1.784485000 | -0.900171000 | 4.684525000  | N | -0.399875000 | 1.689308000  | 0.521098000  |
| H  | 1.978561000 | -1.634253000 | 5.447879000  | N | -1.049923000 | -1.135357000 | 0.689902000  |
| C  | 1.800142000 | 0.459128000  | 4.718782000  | N | 1.699371000  | -1.824835000 | -0.088428000 |
| H  | 2.005931000 | 1.149099000  | 5.519302000  | N | 2.410828000  | 1.027110000  | -0.052317000 |
| C  | 1.372626000 | 2.303158000  | 3.063496000  | C | 0.083096000  | 2.956245000  | 0.263651000  |
| H  | 1.787865000 | 2.902232000  | 3.878757000  | C | -1.666550000 | 1.820325000  | 1.056799000  |
| H  | 1.941615000 | 2.478705000  | 2.152988000  | C | -2.258434000 | -0.618782000 | 1.096318000  |
| H  | 0.331549000 | 2.585780000  | 2.893743000  | C | -1.238534000 | -2.482608000 | 0.424202000  |
| C  | 1.328686000 | -2.648714000 | 2.936972000  | C | 1.139015000  | -3.077101000 | -0.165953000 |
| H  | 1.330481000 | -3.292518000 | 3.821051000  | C | 3.070868000  | -1.963819000 | -0.181808000 |
| H  | 0.394644000 | -2.775920000 | 2.394071000  | C | 3.642899000  | 0.484321000  | -0.348175000 |

|   |              |              |              |   |              |              |              |
|---|--------------|--------------|--------------|---|--------------|--------------|--------------|
| C | 2.446152000  | 2.363720000  | -0.385496000 | H | 7.564236000  | -3.002944000 | -2.453521000 |
| C | -0.904821000 | 3.930566000  | 0.701122000  | C | 8.178866000  | -1.773796000 | -0.786842000 |
| H | -0.787457000 | 5.000954000  | 0.648292000  | H | 9.235528000  | -1.990421000 | -0.909047000 |
| C | -1.967633000 | 3.235221000  | 1.208199000  | C | 7.749133000  | -0.913919000 | 0.232603000  |
| H | -2.868876000 | 3.641405000  | 1.636934000  | H | 8.472105000  | -0.464285000 | 0.906262000  |
| C | -3.252346000 | -1.681831000 | 1.101537000  | C | 6.388089000  | -0.632802000 | 0.386998000  |
| H | -4.296927000 | -1.550825000 | 1.329747000  | H | 6.050763000  | 0.035367000  | 1.172373000  |
| C | -2.632961000 | -2.817631000 | 0.670488000  | C | -3.305564000 | -3.454950000 | -2.486087000 |
| H | -3.088219000 | -3.772257000 | 0.472965000  | C | -2.422204000 | -2.406460000 | -2.782627000 |
| C | 2.200269000  | -4.062785000 | -0.276526000 | C | -2.773890000 | -1.068053000 | -2.564631000 |
| H | 2.053706000  | -5.130455000 | -0.328249000 | C | -4.056713000 | -0.773848000 | -1.993891000 |
| C | 3.390856000  | -3.380388000 | -0.255370000 | C | -4.941182000 | -1.845330000 | -1.712845000 |
| H | 4.384642000  | -3.797271000 | -0.292172000 | C | -4.575473000 | -3.167147000 | -1.961813000 |
| C | 4.504386000  | 1.532051000  | -0.879551000 | C | -1.843491000 | 0.033912000  | -2.913282000 |
| H | 5.517104000  | 1.387291000  | -1.221687000 | C | -4.434708000 | 0.582647000  | -1.767348000 |
| C | 3.763113000  | 2.680759000  | -0.921265000 | C | -3.620998000 | 1.678406000  | -2.180773000 |
| H | 4.064957000  | 3.642908000  | -1.303253000 | C | -2.346375000 | 1.424616000  | -2.785619000 |
| C | 1.375717000  | 3.275102000  | -0.215307000 | C | -1.574324000 | 2.505417000  | -3.229859000 |
| C | -2.534223000 | 0.745657000  | 1.353262000  | H | -0.599943000 | 2.303701000  | -3.664373000 |
| C | -0.240885000 | -3.378749000 | -0.008326000 | C | -2.034093000 | 3.825216000  | -3.110293000 |
| C | 3.986094000  | -0.888442000 | -0.291825000 | C | -3.280446000 | 4.082079000  | -2.516804000 |
| C | 1.646533000  | 4.711044000  | -0.509815000 | C | -4.062346000 | 3.021929000  | -2.060762000 |
| C | 0.807279000  | 5.426293000  | -1.386510000 | H | -0.798190000 | 0.004361000  | -2.188870000 |
| H | -0.027668000 | 4.908705000  | -1.843569000 | H | -3.000148000 | -4.482499000 | -2.654456000 |
| C | 1.047846000  | 6.775964000  | -1.661248000 | H | -1.440004000 | -2.629099000 | -3.192100000 |
| H | 0.395274000  | 7.310337000  | -2.345135000 | H | -5.919988000 | -1.614585000 | -1.300183000 |
| C | 2.128285000  | 7.436642000  | -1.061269000 | H | -5.268142000 | -3.973613000 | -1.739462000 |
| H | 2.314537000  | 8.484706000  | -1.274474000 | H | -5.399514000 | 0.787064000  | -1.312053000 |
| C | 2.966060000  | 6.737343000  | -0.182330000 | H | -1.431769000 | 4.644462000  | -3.490809000 |
| H | 3.799676000  | 7.244368000  | 0.294039000  | H | -3.640961000 | 5.102154000  | -2.423796000 |
| C | 2.727767000  | 5.386434000  | 0.090587000  | H | -5.042105000 | 3.210722000  | -1.628769000 |
| H | 3.372290000  | 4.844991000  | 0.775005000  | H | -1.344769000 | -0.137391000 | -3.877640000 |
| C | -3.867029000 | 1.055531000  | 1.947234000  | H | 0.977230000  | -0.636365000 | -2.114830000 |
| C | -4.755223000 | 1.960687000  | 1.335405000  |   |              |              |              |
| H | -4.459856000 | 2.434617000  | 0.408457000  |   |              |              |              |
| C | -6.004756000 | 2.227892000  | 1.903549000  |   |              |              |              |
| H | -6.680168000 | 2.923094000  | 1.413726000  |   |              |              |              |
| C | -6.390277000 | 1.595629000  | 3.093397000  |   |              |              |              |
| H | -7.360831000 | 1.803589000  | 3.533193000  |   |              |              |              |
| C | -5.515943000 | 0.691528000  | 3.710195000  |   |              |              |              |
| H | -5.804633000 | 0.198269000  | 4.633384000  |   |              |              |              |
| C | -4.266575000 | 0.422996000  | 3.141074000  |   |              |              |              |
| H | -3.588000000 | -0.278626000 | 3.614823000  |   |              |              |              |
| C | -0.641780000 | -4.787946000 | -0.284073000 |   |              |              |              |
| C | -0.378966000 | -5.353840000 | -1.547137000 |   |              |              |              |
| H | 0.113870000  | -4.747097000 | -2.299230000 |   |              |              |              |
| C | -0.757574000 | -6.668906000 | -1.834886000 |   |              |              |              |
| H | -0.555704000 | -7.085444000 | -2.816905000 |   |              |              |              |
| C | -1.399772000 | -7.444901000 | -0.860245000 |   |              |              |              |
| H | -1.695022000 | -8.465561000 | -1.082382000 |   |              |              |              |
| C | -1.655023000 | -6.897084000 | 0.403555000  |   |              |              |              |
| H | -2.142753000 | -7.495381000 | 1.167035000  |   |              |              |              |
| C | -1.278013000 | -5.580564000 | 0.689605000  |   |              |              |              |
| H | -1.473112000 | -5.156124000 | 1.668559000  |   |              |              |              |
| C | 5.430456000  | -1.213313000 | -0.468658000 |   |              |              |              |
| C | 5.875978000  | -2.069783000 | -1.494747000 |   |              |              |              |
| H | 5.148210000  | -2.501279000 | -2.173146000 |   |              |              |              |
| C | 7.237778000  | -2.347582000 | -1.651910000 |   |              |              |              |

<sup>4</sup>TS2<sub>(HS)</sub>

|    |              |              |              |   |              |              |              |
|----|--------------|--------------|--------------|---|--------------|--------------|--------------|
| Co | 0.752857000  | -0.001490000 | 0.357183000  | C | 2.141992000  | 6.999024000  | -0.620414000 |
| O  | 0.234010000  | -0.023362000 | -1.498148000 | H | 2.892122000  | 7.664023000  | -0.202982000 |
| C  | 1.303137000  | 0.037625000  | 2.464043000  | C | 2.106541000  | 5.657623000  | -0.224574000 |
| C  | 1.878809000  | -0.623541000 | 4.590477000  | H | 2.823800000  | 5.281969000  | 0.497576000  |
| H  | 2.119577000  | -1.329071000 | 5.367025000  | C | -3.789265000 | 0.653882000  | 2.176127000  |
| C  | 1.798219000  | 0.732618000  | 4.599679000  | C | -4.790754000 | 1.443384000  | 1.578300000  |
| H  | 1.949819000  | 1.450913000  | 5.386947000  | H | -4.577563000 | 1.935089000  | 0.638422000  |
| C  | 1.272070000  | 2.524392000  | 2.934952000  | C | -6.048586000 | 1.576131000  | 2.175447000  |
| H  | 1.689585000  | 3.140985000  | 3.735952000  | H | -6.809016000 | 2.186346000  | 1.696512000  |
| H  | 1.803132000  | 2.722139000  | 2.008263000  | C | -6.332793000 | 0.918151000  | 3.379480000  |
| H  | 0.214262000  | 2.759710000  | 2.804516000  | H | -7.309639000 | 1.021099000  | 3.842056000  |
| C  | 1.579558000  | -2.441014000 | 2.896693000  | C | -5.348019000 | 0.123058000  | 3.980387000  |
| H  | 1.626484000  | -3.046325000 | 3.806267000  | H | -5.558303000 | -0.391068000 | 4.913455000  |
| H  | 0.665141000  | -2.666063000 | 2.355651000  | C | -4.089933000 | -0.008755000 | 3.383275000  |
| H  | 2.440461000  | -2.663598000 | 2.263678000  | H | -3.326034000 | -0.626002000 | 3.844646000  |
| N  | 1.576373000  | -1.030196000 | 3.287999000  | C | -0.126898000 | -4.778374000 | -0.419038000 |
| N  | 1.450051000  | 1.118508000  | 3.302321000  | C | 0.216464000  | -5.231943000 | -1.709047000 |
| N  | -0.456449000 | 1.594608000  | 0.574351000  | H | 0.680202000  | -4.535459000 | -2.399555000 |
| N  | -0.835677000 | -1.269802000 | 0.828524000  | C | -0.046570000 | -6.548362000 | -2.100997000 |
| N  | 1.917632000  | -1.598742000 | -0.053409000 | H | 0.219166000  | -6.876693000 | -3.101328000 |
| N  | 2.371232000  | 1.254890000  | -0.073213000 | C | -0.656973000 | -7.439815000 | -1.208078000 |
| C  | -0.142826000 | 2.887842000  | 0.207447000  | H | -0.864359000 | -8.461146000 | -1.511924000 |
| C  | -1.701993000 | 1.605750000  | 1.174026000  | C | -0.992103000 | -7.005721000 | 0.081147000  |
| C  | -2.070569000 | -0.863843000 | 1.270249000  | H | -1.453334000 | -7.693394000 | 0.783556000  |
| C  | -0.932107000 | -2.595316000 | 0.460445000  | C | -0.725901000 | -5.689236000 | 0.472510000  |
| C  | 1.468871000  | -2.901442000 | -0.176545000 | H | -0.978660000 | -5.355307000 | 1.473029000  |
| C  | 3.303573000  | -1.611030000 | -0.138961000 | C | 5.604924000  | -0.668910000 | -0.387404000 |
| C  | 3.661318000  | 0.854410000  | -0.319514000 | C | 6.148796000  | -1.472085000 | -1.409319000 |
| C  | 2.254931000  | 2.575109000  | -0.455381000 | H | 5.477269000  | -1.964733000 | -2.104032000 |
| C  | -1.221205000 | 3.762658000  | 0.639330000  | C | 7.533314000  | -1.621361000 | -1.542093000 |
| H  | -1.237516000 | 4.832826000  | 0.509288000  | H | 7.933804000  | -2.239664000 | -2.339793000 |
| C  | -2.157129000 | 2.984624000  | 1.261591000  | C | 8.401443000  | -0.965535000 | -0.659278000 |
| H  | -3.075975000 | 3.310154000  | 1.720611000  | H | 9.475870000  | -1.081162000 | -0.763174000 |
| C  | -2.986221000 | -1.995122000 | 1.219426000  | C | 7.874155000  | -0.154139000 | -0.353996000 |
| H  | -4.032912000 | -1.955221000 | 1.474273000  | H | 8.539514000  | 0.359925000  | 1.041068000  |
| C  | -2.293602000 | -3.050677000 | 0.698296000  | C | 6.489706000  | -0.005363000 | 0.486059000  |
| H  | -2.681058000 | -4.021491000 | 0.441982000  | H | 6.077142000  | 0.623805000  | 1.268025000  |
| C  | 2.620370000  | -3.774954000 | -0.300733000 | C | -2.880764000 | -3.712930000 | -2.555431000 |
| H  | 2.570410000  | -4.849558000 | -0.382043000 | C | -2.210688000 | -2.524580000 | -2.841069000 |
| C  | 3.742354000  | -2.991022000 | -0.240411000 | C | -2.790668000 | -1.273668000 | -2.566466000 |
| H  | 4.770244000  | -3.314868000 | -0.272008000 | C | -4.083120000 | -1.235938000 | -1.946827000 |
| C  | 4.412843000  | 1.978755000  | -0.857804000 | C | -4.753203000 | -2.460922000 | -1.666852000 |
| H  | 5.447993000  | 1.943397000  | -1.160169000 | C | -4.168489000 | -3.677426000 | -1.975327000 |
| C  | 3.540922000  | 3.028441000  | -0.967692000 | C | -2.063254000 | -0.016170000 | -2.865827000 |
| H  | 3.739457000  | 4.006577000  | -1.376233000 | C | -4.686669000 | 0.015111000  | -1.663522000 |
| C  | 1.079816000  | 3.346586000  | -0.334897000 | C | -4.085142000 | 1.248119000  | -2.022546000 |
| C  | -2.449949000 | 0.467722000  | 1.547153000  | C | -2.798886000 | 1.252597000  | -2.655518000 |
| C  | 0.137737000  | -3.363060000 | -0.039017000 | C | -2.238886000 | 2.483329000  | -3.043175000 |
| C  | 4.134151000  | -0.474673000 | -0.236906000 | H | -1.257275000 | 2.485119000  | -3.508147000 |
| C  | 1.139074000  | 4.777772000  | -0.748069000 | C | -2.917142000 | 3.683011000  | -2.831724000 |
| C  | 0.203042000  | 5.281368000  | -1.672279000 | C | -4.184020000 | 3.684658000  | -2.207663000 |
| H  | -0.546110000 | 4.606342000  | -2.068279000 | C | -4.756446000 | 2.487537000  | -1.811037000 |
| C  | 0.236775000  | 6.622239000  | -2.066981000 | H | -1.085204000 | 0.008453000  | -2.166197000 |
| H  | -0.490044000 | 6.991574000  | -2.784683000 | H | -2.403453000 | -4.665206000 | -2.761044000 |
| C  | 1.207997000  | 7.486657000  | -1.544045000 | H | -1.215250000 | -2.554621000 | -3.275235000 |
| H  | 1.235715000  | 8.527726000  | -1.850672000 | H | -5.735162000 | -2.419464000 | -1.203018000 |

|   |              |              |              |
|---|--------------|--------------|--------------|
| H | -4.688274000 | -4.605333000 | -1.757091000 |
| H | -5.662143000 | 0.029778000  | -1.184499000 |
| H | -2.473769000 | 4.620967000  | -3.151022000 |
| H | -4.707046000 | 4.621849000  | -2.045110000 |
| H | -5.736426000 | 2.471638000  | -1.340983000 |
| H | -1.581939000 | -0.047412000 | -3.854143000 |
| H | 0.901147000  | -0.516815000 | -2.022659000 |

<sup>4</sup>TS2<sub>(IS)</sub>

|    |              |              |              |
|----|--------------|--------------|--------------|
| Co | 0.752927000  | -0.001311000 | 0.357342000  |
| O  | 0.233531000  | -0.023360000 | -1.497888000 |
| C  | 1.303514000  | 0.038064000  | 2.464038000  |
| C  | 1.880097000  | -0.622849000 | 4.590302000  |
| H  | 2.121456000  | -1.328271000 | 5.366765000  |
| C  | 1.798747000  | 0.733264000  | 4.599569000  |
| H  | 1.950129000  | 1.451616000  | 5.386827000  |
| C  | 1.271007000  | 2.524793000  | 2.935076000  |
| H  | 1.688086000  | 3.141615000  | 3.736127000  |
| H  | 1.801886000  | 2.723039000  | 2.008383000  |
| H  | 0.213020000  | 2.759333000  | 2.804708000  |
| C  | 1.581493000  | -2.440421000 | 2.896499000  |
| H  | 1.628718000  | -3.045764000 | 3.806037000  |
| H  | 0.667204000  | -2.665897000 | 2.355428000  |
| H  | 2.442522000  | -2.662513000 | 2.263480000  |
| N  | 1.577549000  | -1.029629000 | 3.287889000  |
| N  | 1.450029000  | 1.119005000  | 3.302313000  |
| N  | -0.457303000 | 1.594046000  | 0.574686000  |
| N  | -0.834701000 | -1.270667000 | 0.828830000  |
| N  | 1.918717000  | -1.597650000 | -0.053627000 |
| N  | 2.370455000  | 1.256216000  | -0.073190000 |
| C  | -0.144579000 | 2.887498000  | 0.207797000  |
| C  | -1.702759000 | 1.604350000  | 1.174572000  |
| C  | -2.069860000 | -0.865492000 | 1.270515000  |
| C  | -0.930355000 | -2.596147000 | 0.460419000  |
| C  | 1.470777000  | -2.900637000 | -0.176828000 |
| C  | 3.304662000  | -1.609059000 | -0.139200000 |
| C  | 3.660793000  | 0.856603000  | -0.319566000 |
| C  | 2.253258000  | 2.576349000  | -0.455378000 |
| C  | -1.223428000 | 3.761605000  | 0.639935000  |
| H  | -1.240442000 | 4.831771000  | 0.509955000  |
| C  | -2.158738000 | 2.982938000  | 1.262328000  |
| H  | -3.077697000 | 3.307858000  | 1.721551000  |
| C  | -2.984853000 | -1.997294000 | 1.219408000  |
| H  | -4.031586000 | -1.958041000 | 1.474187000  |
| C  | -2.291592000 | -3.052350000 | 0.698111000  |
| H  | -2.678468000 | -4.023335000 | 0.441559000  |
| C  | 2.622822000  | -3.773401000 | -0.301148000 |
| H  | 2.573541000  | -4.848031000 | -0.382552000 |
| C  | 3.744311000  | -2.988762000 | -0.240787000 |
| H  | 4.772406000  | -3.311950000 | -0.272456000 |
| C  | 4.411549000  | 1.981448000  | -0.857885000 |
| H  | 5.446709000  | 1.946766000  | -1.160299000 |
| C  | 3.538917000  | 3.030541000  | -0.967763000 |
| H  | 3.736769000  | 4.008802000  | -1.376338000 |
| C  | 1.077656000  | 3.347047000  | -0.334772000 |
| C  | -2.450025000 | 0.465823000  | 1.547582000  |
| C  | 0.139945000  | -3.363120000 | -0.039244000 |
| C  | 4.134508000  | -0.472165000 | -0.237057000 |

|   |              |              |              |
|---|--------------|--------------|--------------|
| C | 1.135855000  | 4.778236000  | -0.748075000 |
| C | 0.199326000  | 5.281071000  | -1.672196000 |
| H | -0.549402000 | 4.605470000  | -2.068011000 |
| C | 0.232049000  | 6.621925000  | -2.067042000 |
| H | -0.495139000 | 6.990670000  | -2.784674000 |
| C | 1.202736000  | 7.487085000  | -1.544338000 |
| H | 1.229670000  | 8.528142000  | -1.851075000 |
| C | 2.137213000  | 7.000210000  | -0.620795000 |
| H | 2.886929000  | 7.665786000  | -0.203540000 |
| C | 2.102776000  | 5.658824000  | -0.224814000 |
| H | 2.820406000  | 5.283760000  | 0.497273000  |
| C | -3.789527000 | 0.651134000  | 2.176401000  |
| C | -4.791329000 | 1.440220000  | 1.578538000  |
| H | -4.578217000 | 1.932219000  | 0.638787000  |
| C | -6.049333000 | 1.572199000  | 2.175487000  |
| H | -6.810000000 | 2.182103000  | 1.696530000  |
| C | -6.333402000 | 0.913855000  | 3.379356000  |
| H | -7.310381000 | 1.016208000  | 3.841783000  |
| C | -5.348312000 | 0.119177000  | 3.980298000  |
| H | -5.558488000 | -0.395217000 | 4.913242000  |
| C | -4.090053000 | -0.011873000 | 3.383382000  |
| H | -3.325905000 | -0.628789000 | 3.844781000  |
| C | -0.123820000 | -4.778550000 | -0.419437000 |
| C | 0.219708000  | -5.231733000 | -1.709537000 |
| H | 0.682921000  | -4.534859000 | -2.400004000 |
| C | -0.042511000 | -6.548275000 | -2.101621000 |
| H | 0.223335000  | -6.876312000 | -3.102019000 |
| C | -0.652242000 | -7.440233000 | -1.208747000 |
| H | -0.858987000 | -8.461663000 | -1.512696000 |
| C | -0.987542000 | -7.006513000 | 0.080559000  |
| H | -1.448268000 | -7.694569000 | 0.782924000  |
| C | -0.722166000 | -5.689900000 | 0.472054000  |
| H | -0.975066000 | -5.356245000 | 1.472629000  |
| C | 5.605400000  | -0.665441000 | -0.387596000 |
| C | 6.149772000  | -1.468154000 | -1.409607000 |
| H | 5.478550000  | -1.961158000 | -2.104361000 |
| C | 7.534384000  | -1.616528000 | -1.542412000 |
| H | 7.935262000  | -2.234486000 | -2.340184000 |
| C | 8.402100000  | -0.960248000 | -0.659529000 |
| H | 9.476600000  | -1.075179000 | -0.763447000 |
| C | 7.874306000  | -0.149303000 | 0.353842000  |
| H | 8.539345000  | 0.365107000  | 1.040965000  |
| C | 6.489763000  | -0.001421000 | 0.485932000  |
| H | 6.076802000  | 0.627398000  | 1.267969000  |
| C | -2.878697000 | -3.713676000 | -2.556304000 |
| C | -2.209498000 | -2.524799000 | -2.841814000 |
| C | -2.790225000 | -1.274354000 | -2.566669000 |
| C | -4.082573000 | -1.237648000 | -1.946751000 |
| C | -4.751748000 | -2.463158000 | -1.666914000 |

|   |              |              |              |
|---|--------------|--------------|--------------|
| C | -4.166278000 | -3.679190000 | -1.975819000 |
| C | -2.063571000 | -0.016300000 | -2.865497000 |
| C | -4.686922000 | 0.012930000  | -1.663077000 |
| C | -4.086301000 | 1.246418000  | -2.021963000 |
| C | -2.800103000 | 1.251912000  | -2.655058000 |
| C | -2.240993000 | 2.483120000  | -3.042497000 |
| H | -1.259433000 | 2.485692000  | -3.507579000 |
| C | -2.920048000 | 3.682292000  | -2.830698000 |
| C | -4.186866000 | 3.682931000  | -2.206514000 |
| C | -4.758435000 | 2.485325000  | -1.810104000 |
| H | -1.085938000 | 0.008665000  | -2.165226000 |
| H | -2.400815000 | -4.665578000 | -2.762327000 |
| H | -1.214164000 | -2.554049000 | -3.276277000 |
| H | -5.733635000 | -2.422492000 | -1.202856000 |
| H | -4.685372000 | -4.607502000 | -1.757669000 |
| H | -5.662333000 | 0.026846000  | -1.183904000 |
| H | -2.477313000 | 4.620632000  | -3.149754000 |
| H | -4.710510000 | 4.619728000  | -2.043683000 |
| H | -5.738349000 | 2.468644000  | -1.339935000 |
| H | -1.581682000 | -0.046945000 | -3.853531000 |
| H | 0.900240000  | -0.517159000 | -2.022615000 |

<sup>2</sup>TS2<sub>(LS)</sub>

|    |              |              |              |
|----|--------------|--------------|--------------|
| Co | -0.739336000 | 0.054057000  | 0.229924000  |
| O  | -0.166699000 | 0.028686000  | -1.626086000 |
| C  | -1.301612000 | 0.034650000  | 2.143818000  |
| C  | -1.794215000 | 0.682078000  | 4.286790000  |
| H  | -1.900598000 | 1.377515000  | 5.101050000  |
| C  | -2.021482000 | -0.653526000 | 4.208531000  |
| H  | -2.359173000 | -1.364103000 | 4.942697000  |
| C  | -1.839523000 | -2.435968000 | 2.478253000  |
| H  | -2.437796000 | -2.959914000 | 3.228793000  |
| H  | -2.340003000 | -2.488482000 | 1.517223000  |
| H  | -0.855551000 | -2.901987000 | 2.405295000  |
| C  | -1.041841000 | 2.497185000  | 2.756485000  |
| H  | -0.935224000 | 3.004032000  | 3.719387000  |
| H  | -0.109738000 | 2.567363000  | 2.206750000  |
| H  | -1.842296000 | 2.967183000  | 2.182812000  |
| N  | -1.355382000 | 1.089763000  | 3.025474000  |
| N  | -1.720951000 | -1.036101000 | 2.899846000  |
| N  | 0.170702000  | -1.655931000 | 0.407237000  |
| N  | 0.910812000  | 0.983500000  | 0.692647000  |
| N  | -1.617176000 | 1.773810000  | -0.099523000 |
| N  | -2.385026000 | -0.855306000 | -0.300026000 |
| C  | -0.234766000 | -2.849721000 | -0.152937000 |
| C  | 1.293812000  | -1.915283000 | 1.177350000  |
| C  | 1.984886000  | 0.428439000  | 1.361374000  |
| C  | 1.288894000  | 2.254048000  | 0.282765000  |
| C  | -0.981423000 | 2.979926000  | -0.315563000 |
| C  | -2.983988000 | 2.028790000  | -0.020969000 |
| C  | -3.656175000 | -0.310512000 | -0.309268000 |
| C  | -2.473713000 | -2.122595000 | -0.852182000 |
| C  | 0.647519000  | -3.904191000 | 0.304312000  |
| H  | 0.553870000  | -4.940768000 | 0.023505000  |
| C  | 1.548596000  | -3.340294000 | 1.165136000  |
| H  | 2.341092000  | -3.833994000 | 1.701957000  |
| C  | 3.062881000  | 1.387492000  | 1.402249000  |
| H  | 4.035091000  | 1.193567000  | 1.825083000  |

|   |              |              |              |
|---|--------------|--------------|--------------|
| C | 2.657410000  | 2.484122000  | 0.692045000  |
| H | 3.245967000  | 3.342023000  | 0.422065000  |
| C | -1.972136000 | 4.031913000  | -0.346873000 |
| H | -1.746639000 | 5.077996000  | -0.480799000 |
| C | -3.194457000 | 3.454201000  | -0.111500000 |
| H | -4.150670000 | 3.945855000  | -0.034674000 |
| C | -4.576146000 | -1.268506000 | -0.876901000 |
| H | -5.629874000 | -1.090219000 | -1.024177000 |
| C | -3.842409000 | -2.363932000 | -1.252605000 |
| H | -4.191362000 | -3.256219000 | -1.746682000 |
| C | -1.437112000 | -3.070427000 | -0.840059000 |
| C | 2.114301000  | -0.922830000 | 1.729776000  |
| C | 0.410619000  | 3.202397000  | -0.268695000 |
| C | -3.970872000 | 1.034436000  | -0.042550000 |
| C | -1.671689000 | -4.419782000 | -1.425916000 |
| C | -0.822401000 | -4.896747000 | -2.441517000 |
| H | -0.023789000 | -4.256270000 | -2.792414000 |
| C | -1.009796000 | -6.168687000 | -2.992636000 |
| H | -0.348718000 | -6.517126000 | -3.780500000 |
| C | -2.050373000 | -6.987880000 | -2.535156000 |
| H | -2.196858000 | -7.975174000 | -2.962130000 |
| C | -2.900461000 | -6.525532000 | -1.521845000 |
| H | -3.704383000 | -7.157210000 | -1.155968000 |
| C | -2.711273000 | -5.253411000 | -0.970645000 |
| H | -3.362477000 | -4.899975000 | -0.177943000 |
| C | 3.255361000  | -1.277662000 | 2.615411000  |
| C | 4.244331000  | -2.205315000 | 2.237437000  |
| H | 4.181834000  | -2.671941000 | 1.263047000  |
| C | 5.313360000  | -2.494076000 | 3.092516000  |
| H | 6.071449000  | -3.206772000 | 2.781419000  |
| C | 5.417450000  | -1.857925000 | 4.336303000  |
| H | 6.248605000  | -2.082632000 | 4.997646000  |
| C | 4.446102000  | -0.922691000 | 4.717519000  |
| H | 4.520507000  | -0.420757000 | 5.677523000  |
| C | 3.377543000  | -0.633379000 | 3.863188000  |

|   |              |              |              |
|---|--------------|--------------|--------------|
| H | 2.624621000  | 0.093037000  | 4.151782000  |
| C | 0.902598000  | 4.528741000  | -0.720658000 |
| C | 0.533531000  | 4.995842000  | -1.999552000 |
| H | -0.095982000 | 4.368234000  | -2.621249000 |
| C | 0.985616000  | 6.229811000  | -2.474113000 |
| H | 0.698135000  | 6.563857000  | -3.466462000 |
| C | 1.817322000  | 7.028145000  | -1.676818000 |
| H | 2.176363000  | 7.983717000  | -2.046047000 |
| C | 2.171842000  | 6.588280000  | -0.394885000 |
| H | 2.797764000  | 7.209414000  | 0.238738000  |
| C | 1.711532000  | 5.356678000  | 0.081743000  |
| H | 1.970009000  | 5.033934000  | 1.083619000  |
| C | -5.410688000 | 1.397201000  | 0.054227000  |
| C | -6.007474000 | 2.335437000  | -0.810556000 |
| H | -5.401890000 | 2.805431000  | -1.577403000 |
| C | -7.368628000 | 2.640381000  | -0.703174000 |
| H | -7.813522000 | 3.361227000  | -1.382329000 |
| C | -8.159421000 | 2.008147000  | 0.265204000  |
| H | -9.215594000 | 2.245232000  | 0.347087000  |
| C | -7.581006000 | 1.061583000  | 1.121167000  |
| H | -8.187896000 | 0.563249000  | 1.870995000  |
| C | -6.220409000 | 0.756775000  | 1.013614000  |
| H | -5.767814000 | 0.022227000  | 1.671930000  |
| C | 3.507577000  | 3.480148000  | -2.613580000 |
| C | 2.706451000  | 2.366759000  | -2.857898000 |
| C | 3.064652000  | 1.082172000  | -2.399739000 |
| C | 4.277739000  | 0.944772000  | -1.639457000 |
| C | 5.078719000  | 2.096456000  | -1.399023000 |
| C | 4.709096000  | 3.341243000  | -1.885527000 |
| C | 2.225813000  | -0.091301000 | -2.663437000 |
| C | 4.670242000  | -0.336806000 | -1.181422000 |
| C | 3.966951000  | -1.513577000 | -1.536475000 |
| C | 2.764410000  | -1.409179000 | -2.320471000 |
| C | 2.117898000  | -2.596441000 | -2.719584000 |
| H | 1.204288000  | -2.510865000 | -3.301328000 |
| C | 2.620246000  | -3.849265000 | -2.373259000 |
| C | 3.803002000  | -3.955734000 | -1.610331000 |
| C | 4.461978000  | -2.807251000 | -1.200951000 |
| H | 1.056332000  | 0.011570000  | -1.991515000 |
| H | 3.195126000  | 4.458047000  | -2.963343000 |
| H | 1.777936000  | 2.481815000  | -3.411159000 |
| H | 5.994655000  | 1.976116000  | -0.825615000 |
| H | 5.332611000  | 4.210485000  | -1.698501000 |
| H | 5.586171000  | -0.429382000 | -0.602709000 |
| H | 2.103747000  | -4.750032000 | -2.688913000 |
| H | 4.195745000  | -4.934636000 | -1.351931000 |
| H | 5.388391000  | -2.872953000 | -0.635606000 |
| H | 1.739515000  | -0.064776000 | -3.647742000 |
| H | -0.695937000 | 0.668960000  | -2.143030000 |

<sup>4</sup>Int2<sub>(HS)</sub>

|    |              |              |              |
|----|--------------|--------------|--------------|
| Co | -0.019301211 | 0.015890664  | -0.220201237 |
| O  | 0.306062891  | 0.332389460  | -2.368165029 |
| C  | -0.041287996 | -0.083728541 | 2.072522167  |
| C  | 0.631064507  | -0.151148368 | 4.279189707  |
| H  | 1.339272474  | -0.147050420 | 5.090313653  |
| C  | -0.727421334 | -0.223373654 | 4.271578022  |
| H  | -1.440730040 | -0.302346480 | 5.074355784  |

|   |              |              |             |
|---|--------------|--------------|-------------|
| C | -2.512479073 | -0.245857867 | 2.503496818 |
| H | -3.151536274 | -0.036596840 | 3.366402875 |
| H | -2.683309660 | 0.499143265  | 1.730417542 |
| H | -2.746809872 | -1.235310312 | 2.104117223 |
| C | 2.428620884  | 0.049455318  | 2.536092020 |
| H | 3.061195134  | -0.189448630 | 3.396007696 |
| H | 2.626764954  | -0.650236599 | 1.728190764 |

|   |              |              |              |   |              |              |              |
|---|--------------|--------------|--------------|---|--------------|--------------|--------------|
| H | 2.645553393  | 1.062231780  | 2.189665076  | C | 5.546585623  | 0.409714956  | -1.915182953 |
| N | 1.028204624  | -0.068472890 | 2.941500532  | H | 4.924708162  | 1.028167053  | -2.554046475 |
| N | -1.115514108 | -0.177800381 | 2.929719459  | C | 6.928444166  | 0.345621537  | -2.122365372 |
| N | -1.578708246 | -1.330138875 | -0.384571628 | H | 7.379008959  | 0.914535234  | -2.929996747 |
| N | 1.360865023  | -1.539116262 | -0.384917710 | C | 7.728364370  | -0.453710223 | -1.295160259 |
| N | 1.588742505  | 1.341664355  | -0.272917874 | H | 8.800792867  | -0.504345077 | -1.455843872 |
| N | -1.382815295 | 1.559688557  | -0.308137266 | C | 7.135643517  | -1.185262844 | -0.257628356 |
| C | -2.921905098 | -1.025318492 | -0.503020018 | H | 7.749197020  | -1.800125532 | 0.393956587  |
| C | -1.468178994 | -2.690735604 | -0.169289623 | C | 5.753755870  | -1.119246395 | -0.050523198 |
| C | 1.035772388  | -2.880222865 | -0.337757963 | H | 5.294645922  | -1.678680941 | 0.757725728  |
| C | 2.721986696  | -1.441635992 | -0.640140956 | C | 0.334948561  | 4.906439376  | 0.124193138  |
| C | 2.925531550  | 1.049987147  | -0.420245054 | C | 1.085180080  | 5.710732172  | -0.755487308 |
| C | 1.466985170  | 2.699453800  | -0.066980610 | H | 1.613115350  | 5.237745080  | -1.576502635 |
| C | -1.042205596 | 2.892876022  | -0.260450458 | C | 1.140445765  | 7.098240211  | -0.584592161 |
| C | -2.726683673 | 1.472400770  | -0.614308110 | H | 1.718889416  | 7.703341695  | -1.276187667 |
| C | -3.696144860 | -2.237696378 | -0.289206479 | C | 0.443303953  | 7.707346508  | 0.467198422  |
| H | -4.773493117 | -2.293178496 | -0.284064464 | H | 0.485889492  | 8.784123783  | 0.599181049  |
| C | -2.806236477 | -3.254113579 | -0.062329142 | C | -0.312738992 | 6.918987768  | 1.344668494  |
| H | -3.032193574 | -4.286148917 | 0.154520286  | H | -0.855838365 | 7.382885712  | 2.162553738  |
| C | 2.233849789  | -3.662586556 | -0.603917185 | C | -0.367840631 | 5.531880846  | 1.172680597  |
| H | 2.270036516  | -4.739477604 | -0.658099644 | H | -0.952467718 | 4.917275868  | 1.849312028  |
| C | 3.261526823  | -2.781914432 | -0.809528476 | H | 1.158201778  | -0.129601329 | -2.499264459 |
| H | 4.284692092  | -3.014680453 | -1.058825466 | H | -0.390630708 | -0.098388338 | -2.901828642 |
| C | 3.698498111  | 2.268400300  | -0.217105021 |   |              |              |              |
| H | 4.775207652  | 2.332829747  | -0.235782861 |   |              |              |              |
| C | 2.804554751  | 3.276685105  | 0.021810040  |   |              |              |              |
| H | 3.024932733  | 4.311290658  | 0.231663745  |   |              |              |              |
| C | -2.226637632 | 3.688942229  | -0.560028812 |   |              |              |              |
| H | -2.249636733 | 4.765870319  | -0.618488081 |   |              |              |              |
| C | -3.254579255 | 2.817924944  | -0.795478291 |   |              |              |              |
| H | -4.266631802 | 3.057396699  | -1.081152512 |   |              |              |              |
| C | -3.464219172 | 0.267977476  | -0.688154266 |   |              |              |              |
| C | -0.257940042 | -3.420451451 | -0.143521866 |   |              |              |              |
| C | 3.463736563  | -0.237443419 | -0.656494649 |   |              |              |              |
| C | 0.253575388  | 3.424848914  | -0.050955006 |   |              |              |              |
| C | -4.935954237 | 0.360271809  | -0.908388841 |   |              |              |              |
| C | -5.551018541 | -0.364709489 | -1.948620076 |   |              |              |              |
| H | -4.932173266 | -0.979049879 | -2.594112601 |   |              |              |              |
| C | -6.932805115 | -0.293906632 | -2.152894136 |   |              |              |              |
| H | -7.386976252 | -0.855146201 | -2.963886317 |   |              |              |              |
| C | -7.728221493 | 0.503396263  | -1.319322492 |   |              |              |              |
| H | -8.800713490 | 0.559357286  | -1.477863996 |   |              |              |              |
| C | -7.130599400 | 1.226786325  | -0.278819788 |   |              |              |              |
| H | -7.740439137 | 1.840548323  | 0.377271099  |   |              |              |              |
| C | -5.748789013 | 1.154277929  | -0.074634101 |   |              |              |              |
| H | -5.285975353 | 1.707672445  | 0.735557434  |   |              |              |              |
| C | -0.340100101 | -4.900136346 | 0.039516840  |   |              |              |              |
| C | -1.100747417 | -5.707975159 | -0.828287281 |   |              |              |              |
| H | -1.636484876 | -5.238918796 | -1.646641375 |   |              |              |              |
| C | -1.159437936 | -7.094234339 | -0.648844863 |   |              |              |              |
| H | -1.746587082 | -7.701264145 | -1.331376091 |   |              |              |              |
| C | -0.454945323 | -7.699612583 | 0.400101922  |   |              |              |              |
| H | -0.499884642 | -8.775418288 | 0.538789754  |   |              |              |              |
| C | 0.310539731  | -6.908278279 | 1.266740265  |   |              |              |              |
| H | 0.858270463  | -7.368995338 | 2.083320557  |   |              |              |              |
| C | 0.367978217  | -5.522386348 | 1.086775550  |   |              |              |              |
| H | 0.957940998  | -4.905303762 | 1.756389561  |   |              |              |              |
| C | 4.936792983  | -0.324234838 | -0.878522077 |   |              |              |              |



$^2\text{Int2}_{(LS)}$ 

|    |              |              |              |   |              |              |              |
|----|--------------|--------------|--------------|---|--------------|--------------|--------------|
| Co | -0.012034000 | 0.000068000  | -0.213195000 | C | -6.998498000 | -0.906097000 | -1.504426000 |
| O  | 0.006304000  | 0.007052000  | -2.282376000 | H | -7.899158000 | -0.564251000 | -1.003175000 |
| C  | -0.006369000 | -0.004582000 | 1.723842000  | C | -5.744382000 | -0.563201000 | -0.987107000 |
| C  | 0.644280000  | 0.210492000  | 3.902343000  | H | -5.672735000 | 0.031078000  | -0.082693000 |
| H  | 1.320960000  | 0.444569000  | 4.705308000  | C | 1.042237000  | -4.608007000 | 0.914486000  |
| C  | -0.640311000 | -0.227507000 | 3.906254000  | C | 0.597582000  | -5.783178000 | 0.274219000  |
| H  | -1.311172000 | -0.464232000 | 4.713305000  | H | -0.018110000 | -5.698101000 | -0.613911000 |
| C  | -2.366338000 | -0.844089000 | 2.219605000  | C | 0.964627000  | -7.044210000 | 0.754606000  |
| H  | -2.989138000 | -0.774598000 | 3.115546000  | H | 0.616869000  | -7.936324000 | 0.242190000  |
| H  | -2.788816000 | -0.224896000 | 1.435832000  | C | 1.790682000  | -7.159953000 | 1.880855000  |
| H  | -2.318614000 | -1.881680000 | 1.884891000  | H | 2.074753000  | -8.139706000 | 2.252380000  |
| C  | 2.358240000  | 0.831971000  | 2.205564000  | C | 2.252318000  | -6.001395000 | 2.518984000  |
| H  | 2.987028000  | 0.759562000  | 3.097077000  | H | 2.895884000  | -6.079648000 | 3.390296000  |
| H  | 2.776138000  | 0.214964000  | 1.417499000  | C | 1.881265000  | -4.740551000 | 2.040587000  |
| H  | 2.309192000  | 1.870514000  | 1.874203000  | H | 2.233685000  | -3.840565000 | 2.534501000  |
| N  | 1.022428000  | 0.341712000  | 2.565629000  | C | 4.563065000  | 1.001419000  | -1.610324000 |
| N  | -1.028337000 | -0.354153000 | 2.572119000  | C | 4.689002000  | 1.821578000  | -2.750409000 |
| N  | -1.042249000 | -1.652163000 | -0.332799000 | H | 3.788474000  | 2.185998000  | -3.234121000 |
| N  | 1.625269000  | -1.065994000 | -0.301239000 | C | 5.947009000  | 2.168616000  | -3.251632000 |
| N  | 1.030318000  | 1.654759000  | -0.343589000 | H | 6.020805000  | 2.795217000  | -4.135349000 |
| N  | -1.642056000 | 1.059410000  | -0.264060000 | C | 7.109555000  | 1.708260000  | -2.618147000 |
| C  | -2.370008000 | -1.755275000 | -0.732175000 | H | 8.086917000  | 1.976920000  | -3.006761000 |
| C  | -0.653169000 | -2.902738000 | 0.138190000  | C | 7.000637000  | 0.907762000  | -1.474160000 |
| C  | 1.746558000  | -2.403064000 | 0.060220000  | H | 7.895321000  | 0.561773000  | -0.965188000 |
| C  | 2.866272000  | -0.653794000 | -0.813336000 | C | 5.740805000  | 0.563393000  | -0.972059000 |
| C  | 2.365915000  | 1.759261000  | -0.740059000 | H | 5.659533000  | -0.034961000 | -0.071298000 |
| C  | 0.643902000  | 2.904397000  | 0.136014000  | C | -1.050811000 | 4.606751000  | 0.919272000  |
| C  | -1.755619000 | 2.397422000  | 0.072374000  | C | -0.598918000 | 5.782591000  | 0.284590000  |
| C  | -2.870288000 | 0.651918000  | -0.799463000 | H | 0.022478000  | 5.698147000  | -0.599579000 |
| C  | -2.826105000 | -3.083283000 | -0.484339000 | C | -0.968111000 | 7.043648000  | 0.763049000  |
| H  | -3.827321000 | -3.435267000 | -0.677979000 | H | -0.614825000 | 7.935668000  | 0.254179000  |
| C  | -1.777043000 | -3.783576000 | 0.094460000  | C | -1.804215000 | 7.159843000  | 1.881823000  |
| H  | -1.780535000 | -4.809052000 | 0.425682000  | H | -2.090105000 | 8.139673000  | 2.251763000  |
| C  | 3.098480000  | -2.842846000 | -0.234834000 | C | -2.274073000 | 6.001143000  | 2.513820000  |
| H  | 3.456805000  | -3.847698000 | -0.074171000 | H | -2.926064000 | 6.079371000  | 3.378876000  |
| C  | 3.755718000  | -1.801935000 | -0.823532000 | C | -1.900720000 | 4.740350000  | 2.037553000  |
| H  | 4.758085000  | -1.798945000 | -1.220605000 | H | -2.260150000 | 3.840615000  | 2.526870000  |
| C  | 2.819857000  | 3.084558000  | -0.484278000 | H | 0.510119000  | 0.809570000  | -2.527734000 |
| H  | 3.821491000  | 3.438232000  | -0.672748000 | H | 0.481099000  | -0.805227000 | -2.547441000 |
| C  | 1.769731000  | 3.781486000  | 0.098927000  |   |              |              |              |
| H  | 1.775901000  | 4.804030000  | 0.438969000  |   |              |              |              |
| C  | -3.102280000 | 2.845293000  | -0.243675000 |   |              |              |              |
| H  | -3.453868000 | 3.854984000  | -0.100130000 |   |              |              |              |
| C  | -3.756413000 | 1.802353000  | -0.830269000 |   |              |              |              |
| H  | -4.751872000 | 1.799443000  | -1.244358000 |   |              |              |              |
| C  | -3.213781000 | -0.663317000 | -1.080469000 |   |              |              |              |
| C  | 0.698617000  | -3.251593000 | 0.415213000  |   |              |              |              |
| C  | 3.210593000  | 0.664826000  | -1.089387000 |   |              |              |              |
| C  | -0.706085000 | 3.250372000  | 0.423161000  |   |              |              |              |
| C  | -4.560353000 | -0.997019000 | -1.615934000 |   |              |              |              |
| C  | -4.671275000 | -1.808411000 | -2.763605000 |   |              |              |              |
| H  | -3.763509000 | -2.160589000 | -3.242064000 |   |              |              |              |
| C  | -5.923834000 | -2.152628000 | -3.280154000 |   |              |              |              |
| H  | -5.987983000 | -2.771219000 | -4.170278000 |   |              |              |              |
| C  | -7.093638000 | -1.699146000 | -2.654799000 |   |              |              |              |
| H  | -8.066552000 | -1.966462000 | -3.055546000 |   |              |              |              |

**9,10-dihydroanthracene (DHA)**

|   |              |              |              |
|---|--------------|--------------|--------------|
| C | 3.725398000  | 0.701597000  | 0.000000000  |
| C | 2.511681000  | 1.389179000  | 0.000000000  |
| C | 1.283565000  | 0.702240000  | 0.000000000  |
| C | 1.283565000  | -0.702240000 | 0.000000000  |
| C | 2.511681000  | -1.389179000 | 0.000000000  |
| C | 3.725398000  | -0.701597000 | 0.000000000  |
| C | 0.000000000  | 1.508234000  | 0.000000000  |
| C | 0.000000000  | -1.508234000 | 0.000000000  |
| C | -1.283565000 | -0.702240000 | 0.000000000  |
| C | -1.283565000 | 0.702240000  | 0.000000000  |
| C | -2.511681000 | 1.389179000  | 0.000000000  |
| H | -2.504187000 | 2.476441000  | 0.000000000  |
| C | -3.725398000 | 0.701597000  | 0.000000000  |
| C | -3.725398000 | -0.701597000 | 0.000000000  |
| C | -2.511681000 | -1.389179000 | 0.000000000  |
| H | 0.000000000  | 2.177600000  | 0.874972000  |
| H | 4.662698000  | 1.249235000  | 0.000000000  |
| H | 2.504187000  | 2.476441000  | 0.000000000  |
| H | 2.504187000  | -2.476441000 | 0.000000000  |
| H | 4.662698000  | -1.249235000 | 0.000000000  |
| H | 0.000000000  | -2.177600000 | -0.874972000 |
| H | -4.662698000 | 1.249235000  | 0.000000000  |
| H | -4.662698000 | -1.249235000 | 0.000000000  |
| H | -2.504187000 | -2.476441000 | 0.000000000  |
| H | 0.000000000  | 2.177600000  | -0.874972000 |
| H | 0.000000000  | -2.177600000 | 0.874972000  |

**mono-hydroanthracene (MHA)**

|   |              |              |              |
|---|--------------|--------------|--------------|
| C | -3.697725000 | 0.757749000  | -0.011799000 |
| C | -2.480025000 | 1.429029000  | -0.000148000 |
| C | -1.250063000 | 0.717114000  | 0.008353000  |
| C | -1.285051000 | -0.710195000 | 0.006172000  |
| C | -2.519501000 | -1.365435000 | -0.006911000 |
| C | -3.723473000 | -0.648423000 | -0.015977000 |
| C | 0.000000000  | 1.404111000  | 0.014906000  |
| C | 0.000000000  | -1.517199000 | 0.025420000  |
| C | 1.285051000  | -0.710195000 | 0.006172000  |
| C | 1.250063000  | 0.717114000  | 0.008353000  |
| C | 2.480025000  | 1.429029000  | -0.000148000 |
| H | 2.450590000  | 2.515196000  | 0.001755000  |
| C | 3.697725000  | 0.757749000  | -0.011799000 |
| C | 3.723473000  | -0.648423000 | -0.015977000 |
| C | 2.519501000  | -1.365435000 | -0.006911000 |
| H | -4.627319000 | 1.318410000  | -0.018326000 |
| H | -2.450590000 | 2.515196000  | 0.001755000  |
| H | -2.539759000 | -2.452666000 | -0.009530000 |
| H | -4.671072000 | -1.177487000 | -0.026094000 |
| H | 0.000000000  | -2.164287000 | 0.918447000  |
| H | 4.627319000  | 1.318410000  | -0.018326000 |
| H | 4.671072000  | -1.177487000 | -0.026094000 |
| H | 2.539759000  | -2.452666000 | -0.009530000 |
| H | 0.000000000  | 2.490690000  | 0.017096000  |
| H | 0.000000000  | -2.212850000 | -0.829388000 |

**Anthracene**

|   |              |              |             |
|---|--------------|--------------|-------------|
| C | 0.000037000  | 0.715128000  | 3.668102000 |
| C | 0.000003000  | 1.411675000  | 2.482779000 |
| C | -0.000040000 | 0.725049000  | 1.225423000 |
| C | -0.000040000 | -0.725049000 | 1.225423000 |
| C | 0.000003000  | -1.411675000 | 2.482779000 |

|   |              |              |              |
|---|--------------|--------------|--------------|
| C | 0.000037000  | -0.715128000 | 3.668102000  |
| C | -0.000034000 | 1.409011000  | 0.000000000  |
| C | -0.000034000 | -1.409011000 | 0.000000000  |
| C | -0.000040000 | -0.725049000 | -1.225423000 |
| C | -0.000040000 | 0.725049000  | -1.225423000 |
| C | 0.000003000  | 1.411675000  | -2.482779000 |
| H | 0.000032000  | 2.498196000  | -2.477097000 |
| C | 0.000037000  | 0.715128000  | -3.668102000 |
| C | 0.000037000  | -0.715128000 | -3.668102000 |
| C | 0.000003000  | -1.411675000 | -2.482779000 |
| H | -0.000061000 | 2.496319000  | 0.000000000  |
| H | 0.000093000  | 1.247068000  | 4.614328000  |
| H | 0.000032000  | 2.498196000  | 2.477097000  |
| H | 0.000032000  | -2.498196000 | 2.477097000  |
| H | 0.000093000  | -1.247068000 | 4.614328000  |
| H | -0.000054000 | -2.496319000 | 0.000000000  |
| H | 0.000093000  | 1.247068000  | -4.614328000 |
| H | 0.000093000  | -1.247068000 | -4.614328000 |
| H | 0.000032000  | -2.498196000 | -2.477097000 |

----- End of coordinates -----
